# Supplementary material for: Experimental production of charcoal morphologies to discriminate fuel source and fire type: an example from Siberian taiga
Source: Copernicus journal article supplement (doi:10.5194/bg-18-3805-2021), 2021-06-28
Supplement: Supplementary file 1 [file bg-18-3805-2021-supplement.zip]

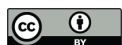

## *Supplement of*

# **Experimental production of charcoal morphologies to discriminate fuel source and fire type: an example from Siberian taiga**

**Angelica Feurdean**

*Correspondence to:* Angelica Feurdean ([angelica.feurdean@gmail.com](mailto:angelica.feurdean@gmail.com), [feurdean@em.uni-frankfurt.de](mailto:feurdean@em.uni-frankfurt.de))

- [bg-18-3805-2021-supplement-title-page.pdf](#)
- [File\\_S7\\_all\\_measurements\\_final.xlsx](#)
- [Supplementary Material\\_revised\\_28052021.pdf](#)

The copyright of individual parts of the supplement might differ from the article licence.
