# Supplementary material for: Experimental production of charcoal morphologies to discriminate fuel source and fire type: an example from Siberian taiga
Source: Copernicus journal article supplement (doi:10.5194/bg-18-3805-2021), 2021-06-28
Supplement: Supplementary file 1 [file File_S7_all_measurements_final.xlsx]

## Sheet: species_250 degrees
L:W ratio	Lenght	Area	L:W ratio	Lenght	Area	L:W ratio	Lenght	Area	L:W ratio	Lenght	Area	L:W ratio	Lenght	Area	L:W ratio	Lenght	Area	L:W ratio	Lenght	Area	L:W ratio	Lenght	Area	L:W ratio	Lenght	Area	L:W ratio	Lenght	Area	L:W ratio	Lenght	Area	L:W ratio	Lenght	Area	L:W ratio	Lenght	Area	L:W ratio	Lenght	Area	L:W ratio	Lenght	Area	L:W ratio	Lenght	Area	L:W ratio	Lenght
Graminoids									Wood & twig from tree															Twig from shurbs												Needleleaf trees									Broadleaf trees			Broadleaf shrubs
Carex	Carex	Carex	Calamagrostis	Calamagrostis	Calamagrostis	Eriophorum vaginatum	Eriophorum vaginatum	Eriophorum vaginatum	Pinus sylvestris (w)	Pinus sylvestris (w)	Pinus sylvestris (w)	Pinus sylvestris (t)	Pinus sylvestris (t)	P. sylvestris (t)	Pinus sibirica (t)	Pinus sibirica (t)	Pinus sibirica (t)	Picea abies (t)	Picea abies (t)	Picea abies (t)	Betula pendula (t)	Betula pendula (t)	Betula pendula (t)	Vaccinium myrthillus (t)	Vaccinium myrthillus (t)	Vaccinium myrthillus (t)	Ledum palustre (t)	Ledum palustre (t)	Ledum palustre (t)	Oxycoccus palustre (t)	Oxycoccus palustre (t)	Oxycoccus palustre (t)	Chamaedaphne calyculata (t)	Chamaedaphne calyculata (t)	Chamaedaphne calyculata (t)	Pinus sylvestris (N)	Pinus sylvestris (N)	Pinus sylvestris (N)	Pinus sibirica (N)	Pinus sibirica (N)	Pinus sibirica (N)	Picea abies (N)	Picea abies (N)	Picea abies (N)	Betula pendula (L)	Betula pendula (L)	Betula pendula (L)	Vaccinium myrthillus (L)	Vaccinium myrthillus (L)
10.7674	190.099	2256.77	8.40057	383.832	12161.8	3.4664	169.055	6186.72	4.12154	163.013	3990.42	3.8567	1990.32	643409	4.57094	192.335	5742.47	1.39389	165.404	15014	2.12293	311.485	33061.6	2.71324	1533.59	582815	10.9355	339	7371	4.31885	2439.22	1002407	2.27423	331.007	32819.7	3.08139	1742.86	662722	8.80173	1300.27	115156	1.52823	235.883	25263.4	3.08268	1027.34	236677	6.48166	1553.72
10.4174	217.146	3338.49	6.6776	437.92	21405.8	13.1041	309.136	5274.55	4.16324	711.198	76295	3.81932	1358.5	336170	1.60279	156.533	11325.9	3.25144	416.811	39742.5	1.90697	154.812	8745.8	8.85724	437.86	13406.5	4.74545	261	11022	2.12874	164.916	9819.63	5.77706	217.894	3732.8	4.21891	596.624	62914.8	5.35763	1409.45	267875	3.36825	319.171	13219.9	1.35046	2459.09	2.82874e+06	1.44762	198.762
20.2416	814.173	22860.8	3.95596	204.583	7671.96	3.66365	314.66	20356.9	1.19771	186.433	20976	2.28606	744.436	177179	1.49341	202.265	19740.5	1.71036	411.311	74050.1	4.2859	430.649	22919.9	5.32046	485.987	30794.3	6.33333	456	32714	2.44974	328.995	33561	2.17613	510.643	87153	1.91672	1025	388238	16.8179	375.182	5298.21	2.40958	360.975	40465.4	1.57355	210.778	19060.9	2.46894	747.439
11.8922	896.085	51381.2	11.3934	307.9	6167.01	24.7751	900.644	23531.1	1.87517	271.144	23014.6	1.82048	376.658	49255.9	2.03246	332.699	42385.7	4.05892	324.305	18753.4	2.80902	766.945	119189	2.46573	161.561	7975.58	6.5102	957	134951	2.43958	243.839	12431.3	1.41012	152.824	11093.3	12.766	585.206	19296.2	4.92919	427.163	27968.4	3.1811	315.27	20610.6	2.36596	279.401	6398.34	2.43382	1495.68
8.0621	318.4	9516.01	17.9966	292.624	2448.67	5.09037	370.33	20224.2	1.65679	1878.83	1592813	2.8948	1593.18	667579	1.47885	226.281	26785.5	2.15447	368.346	43443.8	1.50514	298.316	28887.2	10.3611	635.654	29629.8	12.3261	567	71657	1.29038	172.287	17766.3	2.59192	692.338	131836	4.51623	1371.04	296777	8.29653	1298.53	121768	2.32432	318.923	24413	3.81529	171.844	2811.43	1.64715	156.858
6.85654	2770.78	325939	3.64024	869.145	74691.5	4.7581	1234.05	180782	3.5373	686.914	65104.5	2.83259	154.827	3819.55	1.93879	329.961	39889.7	3.61465	1039.03	219058	2.95227	548.726	59405.4	2.86894	576.426	87191.1	3	258	25266	3.02547	1416.84	500276	2.15808	318.63	31638.1	4.13026	2102.59	785494	4.27377	456.861	36900.8	6.20872	170.969	2973.1	1.39633	160.124	13906	1.64166	187.08
12.6939	445.099	10447.9	5.83642	1546.51	150446	3.57377	219.881	10426.9	5.16058	273.168	9803.86	2.87965	179.245	7706.13	1.83752	1158.73	523975	1.87998	240.171	23259	1.09176	319.408	53480.3	14.7156	371.506	6665.15	3.26471	150	3306	6.57041	601.174	37289.9	2.66342	189.961	8865.4	1.94567	287.262	29734.9	5.05336	154.913	2919.21	7.43441	2848.71	680973	1.42239	181.158	17186.7	1.32369	187.823
4.38272	156.331	4296.66	2.25442	229.281	14743.3	2.56086	254.932	18615.4	2.54959	199.079	10465	9.97006	150.119	916.114	3.72909	199.377	7045.01	1.92712	384.958	53231.9	1.07086	367.385	90713.6	7.06233	485.413	19521	2.95522	198	7952	3.79856	466.946	39921.3	5.25137	547.841	40155.2	3.24566	584.961	71371.4	4.27367	301.081	15771.1	1.85443	162.193	8202.96	2.18861	186.87	11385	1.75834	243.517
5.24907	276.501	10769.9	4.10996	177.523	4643.66	4.01399	1607.9	283136	1.07688	392.802	107187	2.55337	234.754	13020.1	2.11959	160.404	8001.86	7.12359	381.954	11619	2.69834	352.834	34048.7	1.72084	193.163	16225.9	5.67606	403	18635	1.59074	154.884	6596.81	4.26314	210.988	7880.94	3.70614	1300.15	324057	4.14776	815.933	119505	2.99355	204.501	10132.5	1.46384	404.533	63449.7	4.27765	173.597
16.3635	583.645	13455.2	7.31009	240.859	5921.22	7.16863	177.638	3225.46	1.17101	158.644	15782.9	1.90469	184.666	9759.17	3.34563	512.183	56554.6	1.81251	330.466	46620.6	1.99514	159.633	6205.13	10.1463	249.146	3715.71	8.3125	532	34073	2.90147	253.346	15475.4	2.46442	171.076	6575.78	5.58802	825.118	78687.2	1.67482	998.951	239187	1.27198	161.225	15136.2	1.31669	343.626	63861.1	3.12356	324.122
4.7361	204.324	6106.55	13.3214	1272.7	73173.4	3.2734	282.527	9884.04	1.64121	269.199	34085.5	3.96649	2186.24	790347	1.84505	170.985	11433.7	2.52415	300.103	24654.9	3.12283	343.965	28318	3.15262	249.597	12656	3.67308	191	191140	1.80417	353.475	50784.5	6.15329	1162.91	162880	3.11724	293.585	17159.1	9.77616	509.018	17486.3	3.5702	494.318	51114.4	1.41109	393.821	71249.2	2.4154	196.391
6.21524	161.536	2702.34	2.34451	1021.08	120454	2.67059	233.085	14735.4	1.306	315.549	51025	3.61979	1558.46	445894	1.5808	785.67	268820	2.41764	962.872	283769	1.08039	695.078	234764	3.3682	2202.2	754723	7.32609	337	15474	1.3741	160.346	13552.4	3.12981	201.007	8438.23	1.3398	300.245	50495.3	4.07547	833.465	129703	2.27245	595.602	112965	1.39431	326.282	52753.4	2.93774	562.389
4.58306	399.767	26518.7	8.91833	548.782	20576.4	3.11155	508.859	45567.8	1.45699	2036.15	1624024	5.95853	191.841	4212.55	2.37285	451.025	62775.5	1.15786	340.67	77085	1.33498	165.238	15760.6	4.45174	161.274	2330.37	5.90476	496	40661	2.46745	2216.43	1453207	5.615	179.29	4163.91	5.62562	3647.84	825163	2.9187	624.075	101315	6.17465	367.773	15905.2	2.0983	1280.13	474072	1.55395	259.461
19.1027	1312.37	63520.7	4.37379	220.501	8158.27	11.7219	172.804	1869.03	1.57636	196.685	17700.6	2.05949	289.149	27383.5	2.04475	324.688	38829	1.78533	325.104	43953.7	1.45708	184.988	16687.2	3.82092	169.978	5625.49	5.06818	223	9440	17.8471	257.508	2492.04	3.73383	305.013	17742.6	5.60091	169.397	3559.31	1.40333	160.311	13860	1.90535	333.055	42057.1	2.66151	809.095	108671	1.94231	219.029
3.99519	309.993	16900.1	6.12093	733.466	64794.3	4.75017	235.868	8546.01	1.4459	309.121	48284.6	5.69483	173.621	3784.06	5.35995	299.354	12284.1	2.16588	530.847	96560	2.99046	617.627	92277.7	9.39479	185.114	2595.87	6.21127	441	22840	4.61629	1040.94	167562	2.14271	268.01	25410.7	2.15038	172.652	9304.4	2.59821	406.555	33938.3	2.6716	434.512	50177.3	1.99998	153.282	8722.14	1.59965	542.271
6.33093	204.315	4718.58	9.17861	346.066	9558.07	5.63893	408.707	20546.2	1.42676	247.97	33078.7	3.19937	428.443	42053.2	2.81155	787.471	119041	2.16333	202.267	14339.7	4.24378	1615.69	446270	10.3312	221.302	3505.42	3.4918	213	10625	2.82701	248.309	15564.7	2.42773	193.378	3998.3	4.02203	472.12	32949.9	1.93162	2464.77	1205139	1.75568	310.375	40002.8	2.00353	349.137	44290.2	2.76868	181.929
7.47508	158.041	2389.52	12.0354	173.001	1677.13	5.63457	929.013	65469.9	3.17012	407.319	35545.7	4.00394	278.506	10238.9	1.27613	533.079	138250	1.43264	159.789	11570.4	2.308	219.346	14794.5	1.85083	251.733	23820.3	8.53333	384	755047	2.81647	272.915	19121.4	1.93892	375.389	53179.3	2.22705	186.992	10265.2	2.82709	373.878	37885.3	1.4106	172.996	12652.1	2.94349	457.142	41338.1	5.26971	1190.78
7.13835	202.671	3964.13	3.61989	248.603	12733.6	6.49243	446.595	21956.5	1.32899	717.663	282862	2.11711	153.072	8226.62	2.21624	474.932	71684.2	1.04745	828.165	483503	4.3521	248.194	8735.28	4.46691	175.08	4412.33	5.59155	397	22299	1.88425	193.602	15207.2	3.72182	241.953	8247.65	11.2733	1290.78	88342.5	8.05997	192.026	3083.5	2.33475	260.653	16908	2.00283	151.239	8281.82	3.59035	165.859
4.65015	311.296	15902.5	5.53035	670.938	40812.4	9.86535	2738.86	350093	2.28003	265.858	20267.5	4.56632	197.19	6121.01	1.99702	1460.43	759646	6.74342	196.064	4111.34	3.06447	364.628	32520.1	2.82785	468.534	50835.8	3.36364	370	44172	1.44212	622.095	182552	1.53306	150.937	9682.94	1.36151	335.807	62725.5	3.42444	325.361	22672.8	1.54602	293.328	36643.2	1.19635	220.503	21245.4	2.9741	150.839
4.47148	342.948	17793.9	5.27609	896.81	112800	4.14457	378.304	25187.2	1.0907	1090.2	790088	3.05215	161.319	5037.97	1.6594	185.866	14033.5	1.85415	278.043	29767.8	1.68988	183.748	10474.2	6.91157	245.141	5545.31	6.51111	293	14204	3.75686	190.749	6052.66	3.79148	200.679	6595.49	15.4709	768.963	24522.1	2.83266	312.724	25617	2.96461	314.042	16658.3	1.59854	354.341	59646	2.62444	228.868
12.4755	329.292	6186.72	4.25551	200.969	3761.72	8.96219	445.835	16747.7	1.32439	187.325	18874.3	5.01133	771.686	90005.2	2.03369	495.16	88200.6	1.77465	726.032	223450	1.65352	537.764	128093	5.56978	236.646	7263.19	6.65217	306	10664	18.8466	297.911	2887.66	1.32181	283.735	39207.6	5.27592	462.21	29251.2	1.8603	184.835	12561.4	12.0547	922.241	47411.8	1.28028	400.728	78507.1	2.13262	1255.72
5.63843	335.441	13294.8	8.24235	162.356	1813.83	6.79382	430.68	15961.7	1.54881	361.556	62914.8	4.90951	1582.14	206185	2.74224	319.711	28247.1	1.10947	329.059	66228.3	1.02996	340.201	82622.4	1.69116	303.141	17134.1	4.89899	485	27650	4.59998	934.033	121254	3.87524	186.934	6611.26	5.0016	1190.07	178965	2.81732	499.683	58189.6	2.79953	474.372	59264.8	1.2078	343.386	65974.6	2.00965	717.299
27.0521	242.423	1263.11	4.78032	1247.14	163357	14.4308	1480.82	91757.3	2.03988	233.927	20338.5	3.16833	204.356	7907.23	3.30813	322.636	23581.1	1.57729	976.218	461328	2.64505	267.333	20577.7	4.67366	195.803	6107.86	3.67273	202	8746	4.46	345.942	19384.3	1.91063	206.6	13937.5	1.23201	167.919	17118.3	4.37584	730.344	88792	1.85064	608.699	150074	1.73404	588.383	111386	1.58447	196.748
19.5324	1916.27	127463	26.3215	1821.87	70553.9	9.76333	275.577	5083.97	1.25577	633.993	236123	1.53419	227.561	25406.7	1.34157	242.504	33051.1	2.61618	375.88	39820.1	1.5575	170.805	12387.9	3.09155	291.846	21089	6.31933	752	67565	5.26106	252.245	8836.49	3.33256	1487.19	499989	3.05825	177.903	8026.84	1.59262	207.968	17787.3	3.29803	216.887	9254.46	2.09555	154.048	7071.29	2.46009	471.316
5.24257	363.533	18742.9	7.97883	533.945	27143	8.47208	249.828	4815.84	2.91	256.017	14723.5	1.55653	318.898	47602.4	2.35829	485.354	70618.3	2.06201	455.8	74987.2	1.72115	613.765	154772	7.13449	243.481	5814.76	4.21687	350	23416	1.75341	212.302	18854.6	1.7398	195.528	15179.6	3.07202	604.484	86936.2	4.48074	205.439	4535.88	5.16949	1370.09	166689	3.92094	189.685	3759.09	1.80611	313.174
17.2079	2767.45	220666	8.1272	174.663	2566.96	3.31835	157.794	5382.33	2.35553	262.953	19580.1	2.35392	2005.68	1201010	2.71972	269.705	15240.1	2.08807	184.843	10174.5	2.25008	158.142	8221.36	4.59871	241.343	6776.87	2.72193	509	91207	1.84858	174.992	9274.17	2.88122	168.536	6817.62	3.36369	530.383	60596.2	3.54433	977.347	171616	6.84484	768.987	56382.4	2.06625	197.383	13994.1	2.88903	177.012
7.29043	338.621	11101.1	5.58061	217.506	4920.99	9.12514	880.105	64326.4	1.74303	1008.76	435237	5.05657	759.316	65673.6	1.71393	184.998	13754.8	1.85466	155.255	9259.71	2.50489	212.67	8886.43	3.33458	193.69	8177.99	10	950	97373	2.20091	349.391	35635.1	5.64744	199.41	4764.58	6.88804	894.61	72014.2	2.95858	250.097	13017.5	1.52553	518.198	72164	2.79206	552.803	82977.3	1.66347	477.847
9.00039	187.451	2800.92	20.7306	167.544	801.764	8.25343	168.28	2235.74	4.99964	405.753	17754.5	1.68644	908.845	371173	3.21753	489.727	56918.7	1.13225	385.645	93530.3	1.65878	1157.02	610807	4.95311	171.462	3446.27	4.5	405	34848	1.98391	1241.94	416044	2.82181	389.965	40545.6	1.355	333.243	62026.3	5.44443	816.958	51872.8	2.15084	217.247	15910.4	1.51494	217.916	21988	1.40586	170.428
3.32742	772.305	45082.8	14.71	2020.29	168815	3.95901	414.146	31651.3	1.65393	352.004	47833.7	2.14446	539.629	91131.6	1.6171	1548.2	1058716	1.56948	288.021	39679.4	2.17705	241.591	18286.8	7.189	314.321	8503.95	5.925	237	10141	4.04654	188.301	6414.11	3.45935	181.279	5863.39	2.08838	178.302	10235	3.2099	410.958	38982.8	2.26465	2692.35	1989924	1.2881	346.46	66386	3.88971	185.712
7.8372	187.004	3239.91	5.96028	152.833	2561.7	4.85685	489.926	35795.5	1.61027	177.955	14569.8	4.06357	532.093	35347.3	1.30128	477.194	125728	1.62034	287.885	37494.9	1.28223	349.678	64047.8	2.25448	248.299	20454.2	6.01471	409	16989	3.03942	450.936	41954.6	1.66402	753.447	157085	1.36234	330.986	60949.8	3.92705	360.235	22968.6	1.42377	159.939	10579.3	1.71835	245.956	23303.7	3.44901	1165.21
20.0204	488.352	7104.15	14.7137	223.266	2515.7	17.075	422.787	7447.2	2.612	383.821	31973.3	1.89805	161.927	3398.95	2.07155	384.417	40702	2.66269	154.623	6897.8	3.40078	472.496	46619.3	2.77275	151.986	4287.46	8.09524	856.8	33213	1.84991	205.457	17126.2	3.1527	388.903	23533.7	6.24845	523.307	32831.6	2.40697	253.972	19966.5	1.48651	2193.89	498706	3.09194	162.168	3738.06	2.56531	184.174
4.35598	456.121	17820.2	7.13007	233.349	5354.73	10.3245	548.381	20655.3	2.16043	225.011	11887.1	4.59532	214.304	4903.9	5.73844	189.753	4654.17	1.2117	205.071	26627.8	2.88668	471.008	56001.2	6.43743	176.314	2703.65	4.60714	388.4	33542	4.12178	1048.33	177358	3.81636	166.12	4714.63	4.87647	1159.22	169191	1.56685	304.855	36074.1	4.84885	495.779	35928.2	2.49723	975.113	258130	2.061	1025.76
16.0666	213.491	1891.37	12.5423	2659.98	416189	2.24955	274.248	24534	1.19336	382.591	90354.8	2.79445	339.082	30369.8	1.32059	234.915	31617.1	2.30135	1186.53	445133	3.18855	202.105	8695.85	9.84298	529.965	18855.9	4.67347	298.4	60035	3.88108	176.942	5550.57	3.11606	227.735	9438.47	1.23926	157.861	15039	2.43072	923.971	236795	2.05166	350.551	35820.4	1.90492	177.73	12415.5	3.05053	316.208
8.28311	306.789	7334.17	6.16071	1615.66	255513	5.98066	289.966	9957.64	3.35051	212.427	9335.95	1.39093	808.262	221249	1.60494	234.797	26025.8	2.00433	263.458	21107.4	4.01602	162.594	3523.82	8.46324	492.291	14334.5	5.7	150	20367	3.54107	239.86	11896.3	1.26345	239.534	32379.4	2.8285	379.004	38262.5	3.77909	267.761	12247.3	2.41324	783.833	114981	2.48366	214.887	8478.98	3.89107	301.591
9.26406	391.56	4934.13	4.0602	279.65	14543.5	4.37203	169.439	4973.56	1.36083	215.732	24576	2.09037	169.234	8697.16	1.58586	237.491	26601.5	2.10317	270.992	19772	1.45288	301.232	40240.7	2.10309	753.317	131460	12.9556	250.4	14346	6.86292	231.041	5718.81	5.78486	261.301	8469.78	1.26106	197.124	22023.5	2.04019	856.834	141285	2.39133	226.189	14577.6	1.64335	380.914	58351.3	1.76336	227.992
9.57425	182.421	2511.75	5.51739	265.652	8630.13	6.29344	752.884	55549.1	2.24474	278.697	26113.8	2.3087	574.037	87099.1	2.19658	1470.94	731281	2.36386	243.159	18775.7	2.14011	248.74	21266.5	7.58653	201.632	3860.3	11.2558	565.8	16238	5.04487	323.603	13731.2	6.10357	1168.34	110434	10.0348	1398.01	139711	3.77346	2111.5	489398	1.06016	470.001	144103	2.06133	2059.89	1.49015e+06	1.97956	295.144
3.37867	226.718	9280.74	6.75281	157.699	2329.06	7.3049	181.028	1983.38	2.77319	494.599	65124.2	5.83504	1502.27	244098	2.15192	218.941	15460.9	1.72629	305.681	34360.2	1.28904	437.906	109752	14.366	174.494	1395.86	4.52	289.4	8291	2.18777	2421.18	1345087	1.33516	213.459	11159	1.3771	199.861	19875.9	4.08123	273.999	12083	2.88627	1505.29	512364	1.31074	158.122	14400.2	1.82021	754.919
9.32234	520.328	18695.6	5.47299	1996.6	399750	33.5714	637.628	7689.05	2.57703	779.234	160000	1.55046	1065.85	422849	3.82952	186.058	6736.13	4.21444	432.184	17960.8	1.52228	483.562	113396	6.2314	150.346	2538.04	4.1039	289.3	22343	2.19841	708.354	148307	3.7445	525.322	46412.9	3.13243	215.815	10591.2	1.28621	199.995	21646.3	3.43274	2294.41	1104727	1.82242	183.138	11993.6	1.2401	295.67
1.95767	198.6	13919.1	8.12332	874.807	71328.1	18.0375	1015.95	35045	2.04237	222.759	18514.2	2.0466	454.532	73588.8	1.64094	317.836	27133.8	3.29718	182.82	6119.69	5.65525	320.914	10720	2.97333	1953.3	952064	3.09375	205.8	10175	2.30519	1005.07	328151	3.42294	155.882	4901.27	3.17764	305.116	21397.9	4.0179	583.124	44656.9	1.36754	206.12	23348.4	2.65568	575.069	94704.1	1.6582	173.728
4.13096	225.699	9318.86	3.48327	156.44	4655.49	1.33949	151.467	11013.1	1.7481	269.382	31615.8	2.16704	475.132	51076.3	1.51513	959.262	450408	1.50642	276.818	37610.6	1.56199	320.672	47549.8	3.36162	369.122	26025.8	7.50769	542.6	31844	13.3718	518.753	12799.3	10.1629	341.827	7491.89	6.59439	1558.96	246069	4.42872	566.631	45059.1	2.37679	210.94	11745.2	1.38433	228.831	27292.8	2.58666	277.524
6.99133	1071.98	58954.6	3.43894	419.646	31508	6.26812	208.871	4209.92	1.23487	358.952	79227.4	5.41265	175.746	2800.92	1.24523	170.493	17366.7	3.15405	197.5	8701.11	2.43048	339.636	32885.5	6.06481	159.228	2488.1	3.98734	482.1	25247	1.67008	189.789	16214	3.14882	461.037	48154.5	3.51872	314.402	19166.1	2.76561	647.576	95417.8	1.28487	432.321	101200	4.84436	400.903	21037.8	1.93712	165.99
8.21805	184.514	2936.3	13.1764	163.78	1232.88	12.3963	1009.84	55926.3	1.67966	637.475	174665	4.23292	574.221	59180.7	4.44145	699.873	68851.8	1.39471	332.324	56629.5	1.4314	313.216	47472.3	14.8486	503.411	12720.4	6.29787	151	60411	2.39931	394.406	48985.1	2.14579	224.409	13089.8	4.38732	1080.15	186598	2.70258	252.834	16475.6	2.42312	151.906	6935.91	1.76217	545.431	97486.6	4.11085	744.18
9.23756	493.705	17513.9	10.4834	203.81	2881.09	2.75918	208.81	5593.94	3.11341	298.433	16449.3	2.95768	296.774	19966.5	3.64768	336.849	17482.4	1.94646	225.771	16553.1	6.61124	313.967	9186.11	2.61329	222.692	13494.6	4.75	857.1	21413	3.13953	172.722	6026.37	3.83826	189.491	6811.05	4.6347	1833.28	551352	4.36518	500.847	19422.4	1.92873	365.896	51294.5	1.43533	197.572	18402.4	1.4232	399.923
3.17081	161.689	6005.34	4.79224	228.933	6465.37	2.46917	203.301	5373.13	2.0697	163.409	9199.25	7.23298	196.216	3919.44	1.66635	204.792	17958.2	1.90688	509.329	91762.5	2.33886	224.374	15945.9	1.51655	295.778	42281.9	5.20139	206.7	92779	1.59429	484.082	94077.1	2.65719	250.025	15915.7	5.2298	349.482	11881.9	1.9305	436.983	67039.3	1.55149	164.462	11145.8	3.21415	205.979	8262.11	1.82696	285.205
8.9707	1780.21	235059	3.95635	2239.82	544893	4.12256	379.917	19977.1	1.74011	277.992	33395.4	4.21731	581.579	55086.4	4.41878	283.808	12690.2	1.80062	581.161	142718	1.51522	441.134	94876.2	2.08215	288.649	27429.5	3.65476	345.3	20049	3.93134	2231.02	899177	3.20305	296.24	20019.1	9.03759	786.6	36831.2	4.32194	733.467	90929.2	2.06618	165.873	9810.43	1.12338	1004.68	456565	2.80602	1117.75
9.39197	296.777	6629.67	4.48257	279.65	13109.5	6.49537	2089.85	279342	2.53426	461.098	62934.5	1.3041	153.472	12335.3	1.0291	265.184	45764.9	1.51815	253.905	26635.6	2.03836	211.825	16954	2.07031	443.784	70335.7	3.02804	149.2	30714	2.11183	475.773	68592.9	1.4132	194.76	9126.96	3.70007	467.586	34791.3	1.64803	208.046	17581	2.80123	515.612	67413.9	1.45799	474.501	115048	1.81089	353.421
18.4511	238.33	1617.99	5.77345	154.658	2799.6	2.8551	322.232	25974.5	1.3933	161.447	13317.2	2.78005	335.419	29963.6	2.22009	184.131	10244.2	1.09587	328.359	73331.1	3.69606	340.448	23328.7	4.12348	310.697	16064.2	2.34074	209	29024	1.93326	165.232	10098.3	3.5579	283.934	10889.5	4.82955	428.928	27620.1	3.8118	166.593	3851.09	2.26698	289.861	26467.4	2.62089	491.224	58076.6	1.74016	163.544
2.26046	239.536	17782.1	3.81243	193.857	5826.59	8.52626	363.659	11757	1.70489	214.413	19514.4	1.7151	1616.5	598153	2.93454	1796.28	733518	1.58207	158.243	8730.02	3.2665	314.527	18636.4	1.5951	1479.94	1003436	4.81301	150	66311	1.35082	167.609	15832.9	2.58948	297.397	19471	2.01854	294.054	32182.3	2.92052	962.726	186484	1.72257	183.946	14217.5	1.7311	533.843	118472	1.43901	212.885
6.78095	224.165	5303.47	8.58588	279.34	6857.05	3.85992	1069.03	101164	1.25696	382.355	86619.4	2.02885	165.715	8756.31	3.57059	517.856	56722.8	1.85743	332.682	42672.2	5.6388	606.883	43092.8	7.40342	350.412	11320.6	3.26415	337.5	21098	9.88853	935.349	60169.1	4.56731	288.764	9396.41	1.37846	278.39	27663.5	3.33686	417.38	39407.3	4.10304	750.072	95850.2	1.2734	733.334	263201	2.00531	153.894
5.76961	422.889	19100.4	6.76228	320.952	9877.47	8.78027	182.244	2277.8	2.25525	224.933	13522.2	2.23783	573.877	89056.2	1.4087	168.12	13290.9	2.0081	310.714	35903.2	2.0239	610.924	137652	4.36804	684.395	81057	2.40164	215.1	35234	1.83365	248.081	24697	1.22446	198.754	11771.5	5.24619	352.4	17796.5	3.63069	378.922	27944.8	1.77722	299.482	37162.4	3.24111	637.167	78420.4	3.68145	664.272
9.17431	1311.4	106119	5.12311	583.283	35907.2	14.5813	234.256	2422.38	2.25604	307.653	27618.8	2.07094	469.082	77534.5	1.84024	552.878	124440	2.09127	185.688	10404.5	2.41459	169.196	9175.59	1.54301	461.225	104287	2.94118	175.4	26031	8.96003	377.738	11407.4	2.57459	170.785	4596.34	1.51663	1471.42	389112	3.7106	342.551	19656.4	1.01791	155.429	13628.7	1.53154	168.372	14118.9	1.47206	389.471
2.87438	194.029	9852.49	7.91495	839.423	62145.9	10.8131	1116.98	84867.3	1.56323	245.39	26137.5	1.7005	303.559	35409	1.53242	478.182	112045	1.72503	167.328	11110.3	4.43073	272.289	11348.2	4.09577	2493.15	490694	2.7393	199.2	170509	4.00386	1814.41	339247	1.64508	207.536	11109	1.97083	309.375	36110.9	3.75678	354.377	23382.6	2.13116	763.995	177223	1.67128	2070.34	1.10448e+06	2.93307	360.931
10.1789	717.004	38037.8	13.519	320.723	4411.01	5.7925	312.424	9195.31	2.14327	193.146	13509.1	4.83844	182.3	4838.18	2.20215	1393.25	527058	1.77363	509.952	110362	3.84693	325.844	16716.1	4.8519	274.582	10789.6	2.92593	168.2	5555	1.18832	240.367	35619.3	4.63127	496.734	31710.4	3.43642	432.743	38334.8	2.39445	253.276	19924.5	1.57748	579.058	158318	1.93907	680.448	111863	5.44068	596.95
13.6233	183.439	1698.16	11.6475	578.179	20584.3	2.89197	178.76	5123.4	1.47963	323.624	52217.2	1.53253	211.677	22378.4	2.16029	876.241	263276	1.5224	242.759	29194.7	3.95351	1775.4	504771	2.54958	151.244	4376.84	3.15942	173.4	50177	3.53381	416.368	32286.1	4.55193	458.312	25761.6	2.79458	214.085	7226.39	1.48263	291.968	34617.8	1.25272	261.532	36501.3	1.59519	386.019	57624.5	3.04583	240.452
9.56194	1568.24	121442	5.95414	169.51	3623.71	9.6691	471.022	14370	2.17364	464.087	72830.4				2.44849	225.869	14628.9	2.64903	224.467	14561.9	4.98964	296.989	12936	8.29233	578.046	30459.1	2.79377	273.8	27027	3.05176	511.301	60801.3	2.77522	733.695	47219.9	5.00576	171.343	3972.02	2.74092	1041.08	277556	1.61456	184.62	13452.5	2.28829	153.138	5760.87	2.19587	215.492
5.51644	1879.76	184103	4.24753	156.979	4104.77	4.02571	164.219	5059	1.4481	162.309	13206.8				1.7967	495.669	93977.2	1.85301	237.808	22308.7	2.16409	342.476	39838.5	3.92896	258.981	7051.58	1.38414	579.4	62148	2.74455	258.339	16960.6	2.38185	426.096	50520.3	3.47093	1183.42	196755	3.94572	264.585	11567.7	1.29633	341.092	63966.3	2.46244	1098.51	283024	2.80435	159.545
3.70424	160.723	5189.12	1.37834	857.609	370778	2.0536	2234.13	250154	2.81411	156.834	5771.38				2.62562	764.454	166379	1.25154	398.065	95064.2	1.61947	219.016	19518.3	6.36785	568.008	37801.2	2.19504	758.6	35027	1.77988	170.952	9721.06	4.77311	320.439	9655.34	1.90267	188.057	11600.6	3.42446	298.294	10070.7	3.01355	1357.27	260907	1.5075	588.432	155166	1.27534	1075.95
4.02728	203.83	7523.44	7.39356	914.999	83634.5	3.51753	150.808	3615.82	2.92417	242.832	13155.5				1.25634	705.316	291197	1.50809	166.821	13159.4	2.92513	257.115	16128.6	12.2842	745.082	30296.2	1.7931	357.5	37029	4.43033	1701.67	467025	2.37957	649.444	128144	4.97549	2467.36	919852	3.70117	617.006	44969.7	1.69131	792.205	143865	2.39968	175.026	8454.01	7.99427	478.678
2.30795	192.439	4756.69	4.27866	163.361	4132.37	15.7092	1467.17	80692.9	1.73327	168.006	11290.4				7.20295	190.342	3603.99	1.44864	164.653	14150.5	2.80876	159.794	5827.9	10.2229	388.832	10070.7	2.24441	584.7	26322	5.00149	563.384	42425.1	4.81433	334.545	14222.8	4.81142	870.143	116139	1.9688	2652.4	1256027	2.40201	600.231	87964	1.39875	261.441	21441.3	1.89811	268.506
7.75999	317.939	9627.74	3.44911	152.341	4930.19	2.63914	155.063	6531.09	2.52944	168.957	8372.52				1.1612	260.686	31264.8	3.92047	251.072	10287.5	2.99671	1062.35	209417	2.77944	945.445	100316	3.50725	161.1	10683	2.84461	192.768	8910.09	8.74733	368.971	11385	1.71058	164.776	10459.7	2.78979	332.332	26107.3	1.56521	183.779	11456	2.18773	804.574	131747	2.00508	494.075
16.8674	976.681	23382.6	4.22611	176.133	5579.49	13.9636	375.576	6935.91	1.38666	166.409	13001.7				2.10441	186.449	12548.3	2.4729	1030.85	305067	7.03549	576.093	26288.6	3.30249	211.831	9956.33	4.51002	208.3	38217	3.26633	1203.68	308829	2.99648	169.445	5993.51	3.54461	651.821	88722.4	1.84486	217.631	18526	2.14894	261.488	22327.1	1.50407	229.275	23473.3
4.65451	261.557	10359.8	10.4579	212.458	2555.13	5.031	167.642	4103.45	3.42961	300.755	20116.4				2.39065	182.053	10102.2	1.82442	254.19	24953.3	3.01204	187.75	8723.45	3.08829	183.727	6949.06	1.1882	405.1	122920	1.86058	165.467	7156.73	6.17772	192.218	3664.45	2.23739	335.177	33745.1	6.57462	228.967	4328.21	1.9286	289.366	16838.4	1.44308	882.43	234634
6.80475	245.571	6544.23	5.19686	672.615	59239.8	7.57673	204.192	4014.08	1.31638	150.946	12595.6				1.48578	247.785	23211.7	1.56388	268.674	34031.6	3.03784	967.398	222773	2.30837	748.983	105165	5.20601	589.7	27242	1.86208	476.189	91443.1	2.85453	305.928	14498.8	5.03259	697.086	46073.8	2.86324	374.313	36807.5	1.57542	192.866	11270.7	2.64063	183.433	7512.92
2.05114	156.199	8937.69	1.28968	304.447	51471.9	5.32987	177.651	4466.22	2.19091	248.465	21025.9				2.41948	269.12	19911.3	3.88796	414.253	27100.9	3.18444	173.799	6985.86	10.4739	508.434	15756.6	3.93343	147.9	76156	2.98092	199.738	9437.15	7.44351	216.143	4568.74	3.38254	1750.99	688593	3.41983	326.509	22883.1	3.52706	229.264	8944.27	1.87438	156.047	9078.33
4.06748	229.988	8246.34	11.9887	839.592	43240	12.5418	245.113	2694.45	1.75139	485.659	102100				1.83684	151.646	9196.62	1.65409	155.45	10228.4	1.16488	251.822	38879	5.17696	213.808	6386.51	2.83174	208.4	199568	2.07489	152.499	8639.33	1.85172	179.981	11688.7	3.73572	1050.05	189892	4.81653	218.586	6220.9	6.62478	1932.8	388955	1.56833	236.265	20412.1
1.89311	322.896	32630.5	3.45071	330.244	22847.6	8.88053	229.83	3565.88	2.60549	747.33	160450				1.3184	1064.01	629006	1.51421	283.145	38672.6	2.20936	166.449	3915.5	3.25181	174.584	5119.46	2.05912	382.9	81567	3.65318	670.948	91403.7	2.04878	214.738	6377.31	2.96888	285.61	20643.4	1.80615	182.1	13016.2	2.87304	192.153	8882.49	1.90511	458.746	53535.5
13.2926	559.426	15563.4	4.00171	302.363	17001.3	21.207	345.697	3726.23	1.08829	185.203	22679.4				1.11711	176.392	17633.5	2.22245	340.92	34077.6	1.81172	433.289	67417.8	3.55773	1603.01	371360	5.03935	180.2	16086	3.43102	256.295	13238.3	3.55231	196.095	3008.59	2.37122	176.036	8498.7	2.28092	450.609	54146.7	3.02104	643.123	101388	1.8193	170.404	11421.8
7.61016	184.166	3381.87	15.1975	1544.41	61408.5	10.7938	150.617	1272.31	2.33191	194.838	11977.8				3.71353	300.202	18275	1.75765	861.297	294296	4.06768	266.664	13166	4.12511	193.952	6320.79	2.65943	146.4	41124	9.05009	174.853	1625.87	4.149	228.888	9467.38	4.61474	192.923	5670.18	1.93674	1258.02	257643	1.36192	327.503	60807.9	1.59091	206.609	16530.8
4.57096	167.427	4340.04	8.23267	516.718	16838.4	5.01655	156.545	3572.45	1.76888	169.223	11971.3				2.71824	217.446	12799.3	3.06707	526.67	62516.5	2.23093	1044.26	376512	3.74515	2129.78	329604	2.1103	411.7	35983	5.27932	1185.51	170766	3.77384	190.956	5859.45	4.24054	756.257	100882	4.98363	177.727	3928.64	1.72291	781.44	241277	1.22187	192.19	21731.7
26.7998	346.517	3191.28	2.47692	1622.93	547683	7.2176	911.046	87116.2	1.4657	437.717	94592.3				7.03137	176.711	2756.23	2.02533	424.07	64647.1	2.77694	289.304	21959.1	4.49428	179.101	4086.37	5.93252	205.9	9376	2.60223	195.312	9910.32	3.66086	566.383	18984.7	6.51527	204.084	4558.22	4.0668	420.643	25975.8	1.49055	190.343	16680.6	1.85636	948.535	334617
9.28045	620.993	26826.2	16.5471	248.367	2141.1	2.42321	302.962	27395.3	2.66658	201.126	10265.2				1.2517	166.944	16759.5	1.56067	411.907	65952.3	1.5868	1936.2	1633638	8.5008	184.78	2911.32	4.82239	352.2	8775	1.98332	1002.1	328702	2.1361	152.894	4825.04	5.77951	285.726	10204.7	3.59239	191.27	6629.67	2.49105	908.541	209992	3.74669	251.923	11019.7
7.09303	407.396	17341.8	11.1574	158.928	1160.59	3.43573	1367.17	109124	2.86732	2135.7	1000175							3.83494	268.711	13172.6	1.02934	160.128	18870.4	2.09443	205.371	13674.7	3.21579	235.3	50014	1.46439	985.311	383902	1.82342	180.422	9208.45	6.36781	283.764	8452.69	5.38995	183.195	4103.45	1.05626	155.689	17134.1	1.23616	673.009	262365
6.01588	339.212	14548.7	15.0441	618.557	18247.4	10.444	740.223	38236.2	1.98585	461.006	81724.7							2.37231	233.17	15935.4	1.83049	155.583	10031.2	2.03202	157.472	7460.35	2.98083	148.2	7116	2.53041	358.46	22377.1	1.83343	457.269	86039.8	1.85382	171.577	9702.66	5.39038	1680.23	380474	2.49702	384.566	44559.7	1.8884	200.471	12641.6
5.89411	188.031	3753.83	7.63133	431.523	17046	8.67401	163.62	2016.24	1.49941	221.977	21805.3							5.81751	761.373	71467.4	2.04517	274.475	27058.9	6.07834	1346.45	225343	3.89956	209.8	35983	3.88805	229.377	7414.34	6.06738	238.993	6586.29	6.98162	730.188	47400	1.88974	421.632	67319.2	6.43913	2465.91	500513	1.82545	587.132	118810
17.1764	600.356	14769.5	9.55622	393.357	12071.1	1.43244	860.146	142475	1.52066	640.809	179675							1.43445	317.338	49767.2	6.03887	758.721	71911.6	2.5295	1044.41	311439	3.09949	187.8	51473	1.75197	166.533	9019.18	1.97246	1241.21	289438	2.58745	2374.1	719898	2.83913	270.225	18702.1	2.46936	843.583	205504	1.52854	384.414	62680.8
6.53764	174.079	3451.53	8.55397	320.793	8665.62	5.77385	163.286	3398.95	1.25956	838.183	294481							1.5277	491.43	116265	3.43886	176.557	6562.63	9.69027	426.949	13658.9	3.13911	191.3	8662	8.09463	2545.07	570452	2.8102	514.784	66241.5	2.52942	330.345	32708	7.60888	719.215	50498	6.06052	1111.49	132603	2.12008	188.402	11565.1
4.76969	476.46	31327.9	8.57985	617.477	29316.9	1.30353	606.457	64264.6	1.39131	171.623	15194.1							2.1096	506.734	87363.3	1.82859	595.514	147994	10.9688	736.825	35351.2	2.84287	152.3	35373	2.59303	181.203	9034.96	2.07344	303.48	24779.8	2.9627	159.388	6084.2	4.42828	2569.31	1066039	3.04117	912.529	168393	2.59168	270.798	21160
3.76261	517.157	52361.7	6.85584	626.061	32690.9	5.07031	218.053	6989.8	1.8202	515.61	101235							2.6047	237.691	14577.6	4.03639	180.344	3756.46	9.03137	360.159	9887.98	1.20965	330.3	5216	8.10286	436.435	17368	3.48995	544.305	45281.2	3.5722	363.494	27927.7	4.87319	511.884	39519.1	4.55834	1285.3	180258	1.12569	247.742	35055.5
2.61137	167.474	7828.37	4.80362	509.932	40914.9	3.72291	151.391	4158.66	2.49972	198.564	11300.9							1.46944	638.074	207101	5.00961	159.633	3682.86	11.3283	294.669	5450.68	4.02794	174.5	20173	6.79721	2439.53	514628	3.19172	213.715	8814.14	3.99543	269.933	12252.5	9.66237	499.434	17064.4	4.63851	333.878	17567.8	1.38488	457.004	109077
6.75674	275.935	8547.33	1.18642	391.158	85963.5	13.2448	2743.35	225733	2.03314	619.203	135899							2.17506	1109.17	399974	3.11835	427.806	27171.9	7.58596	301.518	8898.26	1.70934	383.7	16725	9.08143	976.07	73755.7	4.46491	754.788	67214.1	3.52254	163.056	4993.28	6.53497	266.448	7231.65	1.87491	522.536	95244.3	1.54227	280.114	30494.6
6.54982	169.403	3308.26	8.9062	2236.93	416943	9.07181	194.683	1947.89	1.60533	363.142	60877.5							2.38821	329.902	34072.3	5.14201	157.995	3452.84	4.30869	234.168	7691.67	1.18517	190.9	239149	5.02344	1174.19	193841	12.4394	459.759	12031.7	2.72502	1998.38	1007620	2.53277	184.151	9793.35	2.43123	520.53	55307.2	1.86961	564.895	69330.2
8.9346	612.36	32209.9	4.07497	298.99	16338.9	27.1553	2396.03	140194	1.27374	233.349	24369.7							2.14713	805.106	225248	2.28353	182.105	5894.93	6.09587	591.012	42996.9	1.47894	197.9	560012	2.52269	281	14557.9	4.87824	430.814	17234				2.30114	308.344	29812.5	1.46178	1050.53	525444	1.91734	196.445	14214.9
2.86036	156.841	6232.73	10.8812	623.312	26753.9	2.28418	394.325	50382.3	1.23951	663.072	255017							1.48902	237.301	27403.2	7.28247	152.994	2070.13	1.4656	601.199	40888.6	3.10467	150	127761	9.56068	478.321	16236.4	2.33896	155.055	7068.66				3.50774	269.777	14310.8	1.72129	1300.25	394357	1.94868	393.164	39762.2
4.95227	158.826	3533.02	2.60196	657.739	125525	10.2748	359.419	8305.48	3.56347	1193.51	292510							1.56487	151.645	11165.5	1.98199	625.955	141749	6.97826	339.317	12395.8	3.34098	344.4	361563	4.34508	185.554	4230.95	1.03163	177.206	14542.2				3.96693	381.969	23945.1	1.80738	184.724	10029.9	1.84585	933.611	323752
2.56911	374.736	36350.1	5.57987	492.578	28933.2	7.45511	242.309	3162.37	1.21943	152.155	10010.2							1.87766	164.459	6541.6	4.18353	300.341	15930.1	6.08534	434.914	23452.2	3.82589	177.3	53694	1.15157	541.343	193296	4.81951	205.563	3856.35				8.69205	1951.17	250788	1.24611	178.179	19130.6	1.20189	379.253	79899
6.72859	321.702	9211.08	2.63441	164.101	7184.33	4.3326	215.845	3890.53	3.14119	251.504	13113.4							2.05449	160.928	7315.77	2.83526	177.736	8359.37	5.50732	153.262	2977.04	3.53755	147.5	20722	7.7133	2292.67	449947	2.18463	311.053	14689.4				2.78826	356.123	34839.9	1.90132	152.962	8582.81	1.51818	167.596	13075.3
3.6366	266.736	14379.2	5.66947	611.243	27978.9	16.3037	477.335	9245.26	3.18064	934.393	200601							1.77475	187.934	14400.2	3.95235	164.45	4537.19	6.7681	486.159	20217.6	2.38118	143.5	13003	1.87519	441.348	64000.5	4.10805	208.126	5392.85				4.94556	1023.18	154102	2.85727	393.516	31204.4	1.90571	543.872	98013.6
8.9065	1321.06	60253.2	7.36367	339.349	10788.3	10.5679	234.157	3041.44	1.26145	216.451	26734.2							2.8114	895.241	213866	3.50557	395.269	27032.6	2.3997	660.224	133981	4.05752	859.7	55664	1.2983	151.099	13304	1.44441	211.156	13574.8				1.69557	196.889	16457.2	2.26964	399.294	51744	2.27838	826.152	200211
4.11892	1592.2	155150	2.40685	1301.04	507368	1.96612	512.185	61818.6	2.54257	662.988	129106							1.49476	272.606	35732.4	1.78267	170.662	11637.4	7.45392	150.412	2279.11	4.36442	273.2	26054	10.9955	201.261	2612.96	2.67821	157.302	3970.7				3.14325	683.469	110935	1.34585	278.884	29322.2	1.41367	459.006	108045
7.18396	354.197	13218.6	6.49574	317.068	11346.9	4.01593	320.077	14423.9	1.40241	177.006	15554.2							2.40062	259.427	20976	1.53393	965.376	457785	1.61925	707.311	221341	1.86815	190.5	5758	2.52038	370.473	41244.8	4.34589	156.201	3454.16				2.87401	210.802	10400.6	1.9874	160.274	7242.16	2.52743	677.055	103017
5.14765	996.975	104675	3.37512	305.942	20655.3	5.08903	1033.7	128648	1.36095	1218.45	635312							3.10236	2371.02	1212058	1.48545	1656.81	1170216	2.8235	570.109	87036	2.02063	149.1	4428	2.7476	866.993	137233	1.72888	372.989	35018.7				5.79349	291.503	9375.38	6.35862	166.476	2708.91	2.57539	204.994	10355.9
16.2522	483.242	10839.6	16.7008	154.492	952.916	2.06367	157.153	8856.2	1.50116	658.156	193020							1.65711	302.811	42673.5	6.97483	283.854	8720.82	4.40489	176.399	3688.11	1.2959	241.8	95667	2.03349	940.113	303564	1.20073	202.513	16626.7				5.77303	170.269	3651.31	1.40179	1288.79	429114	2.01144	332.776	28346.9
9.39154	391.531	6293.19	6.1278	1635.78	259164	8.93757	175.645	2565.64	6.69222	274.263	4376.84							4.35741	183.995	5636	1.97887	293.684	27133.8	5.80402	156.59	3109.79	4.29245	627.4	23225	4.59639	191.193	3634.22	3.0761	363.174	26000.8				7.51831	308.904	8189.82	4.63416	309.437	14550	1.52768	496.006	83284.8
6.72895	227.063	5465.14	7.5484	239.091	5254.84	5.93089	153.615	3005.96	1.63281	236.78	26169							6.74608	960.637	75317.2	2.04373	862.616	269609	4.47583	170.142	4198.09	4.22678	143.6	24007	6.7675	2345.25	596055	3.69493	517.056	43106				1.95085	1056.09	110279	1.62816	214.501	15279.5	1.52728	151.863	11127.4
9.6073	183.788	2060.93	4.6292	349.391	19577.5	12.8874	242.562	3122.94	1.78543	521.106	105314							3.58149	1336.43	372229	7.93606	266.727	5666.23	2.64568	779.682	168322	4.00802	215.8	17460	3.27734	937.003	203195	2.98803	778.151	72583.3				4.02083	199.993	6460.11	2.1743	270.174	15846	4.64158	230.486	8130.67
2.13823	2760.07	958465	3.69827	215.194	9155.88	2.97902	261.617	15312.4	2.8211	252.453	15880.2							1.50084	264.858	33474.3	1.71567	767.097	204317	9.32531	309.611	5998.77	2.18601	232.3	9881	1.78733	697.799	201001	2.38832	171.065	7419.6				9.07982	358.236	9626.42	2.69401	1300.49	292691	2.22821	3065.94	2.68649e+06
7.38948	205.82	4216.49	5.89462	2516.05	807507	5.78288	1289.05	182530	3.03003	332.623	26096.8							4.84455	1576.57	376247	2.26805	160.608	8635.39	4.95024	172.431	4612.11				2.04109	1566.89	400661	2.61802	608.236	75200.2				2.42541	153.656	6679.61	1.12487	182.023	15508.2	3.34727	232.487	10864.6
3.9221	162.632	5181.23	4.64137	3093.06	1502874	3.40432	150.769	4304.55	1.31138	221.057	27288.9							2.94432	168.718	6604.69	1.87402	219.879	18894	1.47532	183.58	16898.8				2.26181	421.12	58068.7	2.80103	536.374	41417				5.70614	162.941	3026.99	3.5268	570.475	60847.3	1.09639	229.785	30452.6
35.9636	862.84	13134.5	24.8713	1450.74	54194	8.22562	383.758	7854.66	3.33991	320.887	23478.5							1.95565	171.699	9654.02	2.73761	987.47	262964	7.88188	255.412	6184.1				4.26271	2675.14	1176241	1.76224	178.548	4907.85				5.40776	2248.51	664887	1.15578	428.595	106812	1.70806	224.256	21486
17.6262	731.605	22333.7	4.21709	528.463	44265.2	19.9495	2711.12	257308	1.47878	213.632	23101.3							1.64493	242.144	27237.6	2.17426	310.838	28609.8	4.88512	318.579	14853.7				2.90481	1889.83	575022	2.74776	176.493	6857.05				3.65321	891.952	131003	2.51765	1060.92	275780	5.15792	199.503	4551.65
6.86264	332.951	12165.8	11.6831	415.274	10668.7	8.08071	987.468	81091.2	1.53346	423.138	84611							2.28596	419.832	51734.8	2.31063	1210.18	480780	3.43191	735.857	78354.7				4.79311	228.439	7273.71	1.6869	593.436	102258				2.81858	300.947	23769	2.11048	388.621	29143.5	1.87175	921.755	334776
6.20089	609.737	43211.1	6.63293	318.243	10911.9	9.57594	191.983	2456.55	2.58506	312.068	28343							3.93471	1882.31	642895	2.15833	509.292	89432.1	7.83756	193.82	2786.46				1.80458	519.18	110772	1.63691	191.994	9647.45				2.27871	616.372	124155	1.95179	273.123	24089.7	1.67029	433.21	81231.8
9.44484	358.285	6243.24	6.56921	656.783	38691	5.41866	317.578	6407.54	1.7456	492.02	105544							1.86393	497.613	101130	2.22151	966.851	319566	2.94053	348.827	27785.7				1.79989	589.629	137250	8.41039	737.089	46284.1				2.19825	429.485	59397.5	4.13854	284.168	8900.89	1.63031	440.131	90098.5
5.3394	376.552	19246.3	8.9518	150.352	1875.6	4.86021	569.691	50269.3	2.61027	759.074	165439							1.65809	201.832	18418.2	2.19487	211.252	15559.5	2.4987	882.531	203954				1.79458	307.083	38383.5	2.21908	227.049	17077.6				4.06454	190.895	6577.09	2.12609	524.817	85252.5	2.63264	1069.36	252235
2.05684	755.901	92681.3	4.8039	419.029	27225.8	8.77717	758.898	41079.2	1.10363	194.849	25275.3										2.47389	1033.09	303429	3.63358	320.573	20573.8				1.96393	635.997	141402	3.04852	1918.4	821847				3.17516	829.051	157528	1.56633	243.314	24773.2	1.43106	161.939	14209.6
4.12201	404.453	21114	3.29167	291.065	18159.3	3.80556	341.238	20809.1	2.34719	188.369	11279.9										1.86156	158.433	10060.2	5.41543	158.44	3498.84				2.93042	1313.58	408625	4.87827	168.699	3481.76				4.27434	2832.7	1345716	3.23162	173.487	6370.74	2.83673	2705.32	1.76347e+06
3.84744	190.402	6880.71				7.13068	525.503	29382.7	2.32639	301.492	24306.6										1.90039	2329.78	2190083	8.18733	298.734	7913.8				1.5303	157.833	11796.4	1.70691	181.748	12762.5				4.92188	212.768	6870.19	2.53546	150.164	6281.36	1.07724	330.598	70221.4
3.88003	1203.77	182410				4.92531	152.154	1845.37	1.59561	241.732	24691.7										2.07152	644.151	134623	4.71378	219.554	4121.85				2.41004	621.125	82193.9	1.806	472.005	78175.9				8.45586	1921.26	288426	1.4395	190.905	15326.8	5.81366	155.817	1849.31
5.38639	247.234	7299.99				2.53055	176.863	8925.86	1.48055	305.64	45834.6										2.24663	225.424	17149.9	1.61974	294.538	35431.4				1.22373	160.678	13434.1	3.6183	209.179	6920.14				2.79454	247.293	13424.9	1.64419	161.084	8126.73	1.64163	531.327	119680
6.99654	218.853	3818.24				8.02599	157.749	2204.19	2.19834	453.801	68276.1										2.63519	545.454	68719	6.564	982.119	96098.6				6.7499	2346.72	598627	3.67363	244.362	7411.71							1.5119	570.682	139457	1.85252	261.91	27079.9
1.7894	155.805	8020.27				4.73239	246.264	2967.84	2.7833	220.727	11688.7													3.12329	1993.99	921095				2.34649	216.513	13656.3	1.68644	210.13	11243.1							2.40699	188.475	5391.53	1.89413	830.067	216384
8.07385	261.934	5375.76				5.61666	562.832	26100.7	1.7736	160.709	10211.3													2.26999	155.759	7364.4				3.2764	941.498	205166	3.08764	152.549	4794.81							2.26769	211.532	14974.6	4.01705	372.282	26351.7
8.31487	429.7	8187.19				3.36128	156.432	5256.15	2.09464	315.525	37073													1.80154	210.067	16976.4							1.13439	542.535	58210.7							1.57271	322.262	39449.4	3.62455	323.681	15435.9
25.9784	891.801	18627.2				5.89758	1135.04	103491	2.58228	410.006	47333													8.36867	478.296	20651.3							3.20088	1149.04	228875							2.30716	637.268	96042.1	1.7252	1147.71	559225
8.81298	669.025	25175.4				9.09576	1082.56	45941.1	1.97609	397.918	60697.5													7.30786	272.327	7395.94							1.86847	264.288	16844.9							2.85115	279.233	20142.7	2.32444	1213.25	330939
21.1097	1797.11	102582				9.81098	992.02	74436.5	1.42767	253.627	33119.4													2.30882	228.705	13109.5							1.78612	786.725	176166							2.24615	352.745	41300	1.79455	292.493	33751.6
3.69191	285.604	11904.2				6.82851	237.511	6140.72																9.6776	611.425	25130.7							2.46111	1152.9	342949							2.1343	263.864	16578.1	1.43148	239.604	18031.8
2.19374	176.218	10463.7				5.08043	251.751	9032.33																1.28576	211.453	22672.8							1.75797	300.89	33106.3							3.04327	702.282	110463	1.53418	286.398	34394.3
3.4077	292.732	11354.8				3.51975	544.047	18460.3																4.13974	160.437	4684.4							3.19361	192.118	8538.13							1.96801	247.676	23136.8	2.92047	153.656	4718.58
2.40469	201.669	12131.6				6.68232	378.964	7527.38																6.58696	170.322	3208.37							5.88325	389.152	18437.9							2.2233	1421.31	591566	3.99512	173.585	3945.73
3.31815	305.234	11785.9				5.5949	156.989	3280.66																2.28119	365.536	44420.3							2.57878	413.055	25919.3							2.17607	375.915	43428	1.61411	160.078	8352.8
7.34766	231.114	5374.45				5.09456	185.543	4976.19																2.05886	431.276	64154.2							3.40361	255.753	12246							1.25405	539.817	123678	12.4133	401.244	8191.13
10.2996	306.45	6481.14				1.40044	521.896	61217.9																2.42979	229.06	12721.8							5.30301	190.47	4767.21							1.60683	1382.85	808182
4.93633	1438.18	96017.1				3.2673	289.044	16566.3																3.52277	728.073	106418							2.59622	160.501	6023.74							1.90128	211.258	17258.9
2.10079	224.448	17362.8				12.8335	320.877	5826.59																2.23645	441.025	48460.7							2.86542	219.288	8430.35							1.6244	350.578	50572.9
5.40781	168.508	3552.73				5.9144	214	5624.18																2.47017	186.937	10589.9							2.75102	532.882	47486.8							2.06971	303.345	33465.1
2.01751	324.58	34763.7				26.2736	359.535	2519.64																1.56513	316.149	45149.8							9.01748	169.573	2241							2.28208	727.849	140424
5.44081	202.215	5533.48				6.10944	259.452	4609.48																1.67135	312.606	37768.3							6.04264	308.41	10119.3
3.88405	246.14	11864.8				5.10627	408.005	24361.8																									1.04083	821.313	473987
3.73074	184.779	4489.88				6.56162	525.233	19197.6																									10.8053	272.033	4159.97
3.26649	626.356	74063.2				5.5581	163.675	3166.31																									3.14088	320.105	14404.1
6.67195	198.373	3826.12				5.13329	213.73	6814.99																									2.46594	261.613	19928.4
14.2411	603.149	18324.9				12.0303	324.718	4738.29																									3.10397	1010.19	225267
4.02659	156.646	4075.85				3.35823	353.262	9853.81																									3.2898	160.456	5641.26
5.2498	1144.24	144622				5.18429	522.857	39024.9																									1.41115	535.032	145353
10.3868	1550.26	83593.7				3.15788	272.509	13913.9																									4.17694	180.978	5867.33
9.54527	218.016	3542.22				6.865	278.122	8116.21																									6.04785	223.829	5908.08
12.0891	246.416	3128.19				11.2078	342.176	7043.69																									6.57101	360.923	14164.9
5.23056	568.094	46824.3				7.47275	310.894	9330.69																									9.63992	314.242	6485.09
4.00803	191.67	6972.72				7.01093	362.186	13112.1																									2.77899	188.478	7650.93
6.46545	155.101	2292.26				3.10349	193.187	8862.77																									2.93584	428.866	31820.8
5.75702	1334.23	150987				3.00664	338.021	16306																									3.50553	2055.29	782722
7.14951	206.122	4396.56				14.2828	3295.48	322422																									2.28652	247.367	19965.2
5.23663	307.633	13120				4.27414	339.732	20009.9																									2.0587	928.057	309361
3.80122	172.266	5680.69				8.88575	258.831	5003.79																									1.38124	224.785	16833.1
7.96629	172.01	2745.71				3.14792	376.446	29085.6																									2.45511	179.082	10181.1
8.64909	1162.39	70176.7				5.32734	224.675	6556.06																									4.79061	155.016	2912.64
8.18759	192.498	3214.94				4.23858	253.309	5668.86																									2.46984	169.164	8427.72
7.75531	2844.2	286578				4.62828	1091.39	167713																									1.82589	807.953	233480
2.65393	1623.31	249575				2.15205	234.369	5588.69																									1.93291	185.756	12883.4
4.0994	247.368	10747.6				6.75751	193.273	3780.12																									7.55661	230.857	4622.63
5.2106	413.127	23754.5				3.38626	600.152	76494.8																									1.92175	223.607	15361
10.1312	223.041	3434.44				4.78671	216.381	7115.98																									1.62329	161.503	12194.7
3.22781	238.363	13294.8				8.96949	689.591	28841.1																									2.2257	187.475	10806.7
3.44149	309.509	18815.2				4.353	236.183	7666.7																									1.31465	801.902	326770
4.1936	836.461	37498.9				10.5684	154.08	1686.33																									3.6814	1164.77	261702
3.83327	252.242	6876.77				10.7421	282.263	5349.47																									5.03318	607.839	25062.3
9.83311	418.614	13004.3				8.80966	163.867	2290.94																									1.933	175.8	11528.3
5.39375	152.341	2946.81				11.7854	508.326	14848.4																									2.98851	340.675	25977.1
4.56512	283.133	9161.14				6.66145	298.47	6704.58																									5.25704	376.943	19915.3
5.68869	512.787	20145.3				3.83757	210.456	8168.79																									4.62595	260.693	11051.2
14.1601	1460.8	85862.3				8.88645	660.662	36037.3																									2.01975	155.645	8439.55
3.58568	192.479	7501.09				18.4399	2365.08	213126																									2.79787	159.447	6775.56
5.51595	244.319	8214.79				5.38019	218.792	5062.94																									4.20414	181.689	5516.4
2.13178	310.592	25912.7				3.16042	204.302	8410.63																									6.08016	251.628	7481.38
4.71057	242.839	8831.23				9.62643	871.781	49865.8																									7.54016	490.206	12704.7
7.6152	162.593	2548.56				15.5134	747.282	24338.1																									3.98843	260.045	5578.17
4.89121	268.607	11109				2.09939	1720.15	431223																									6.38615	336.031	12917.6
10.8194	716.867	24348.6				5.23603	229.685	7687.73																									1.66321	740.947	241298
5.93163	598.212	43696.1				2.9355	174.659	3560.62																									4.33511	1017.48	180686
4.06969	280.405	12870.3				7.11363	461.04	16609.7																									3.38758	599.955	71885.3
9.15071	427.396	13189.7				11.5067	175.084	1671.87																									2.50879	161.235	4768.52
1.76352	167.103	7115.98				6.09049	1060.97	43014																									2.34916	190.681	11751.8
4.3881	196.158	5812.13				4.06269	178.705	5809.5																									1.73358	2402.47	1533774
4.17061	301.771	13842.9				3.37526	353.59	18452.4																									3.34204	214.729	9872.21
3.38914	403.407	25479				3.53955	338.232	24344.7																									9.96719	221.338	3568.51
5.14002	226.549	6830.76				6.1782	205.279	4951.22																									5.25272	346.216	16394.1
4.04572	396.514	23013.2				5.1943	588.817	35965																									5.70797	251.507	7946.66
6.38176	446.479	17498.2																															6.70811	220.873	4782.98
3.75892	266.437	5989.57																															5.07304	525.566	21508.3
4.29173	951.222	61922.4																															5.66109	324.346	12335.3
3.17583	214.543	10741																															3.67857	167.943	3175.51
14.2235	165.266	1418.2																															3.09782	320.514	11613.7
4.36348	188.283	5232.49																															4.50732	1143.07	208306
6.93903	412.192	17166.9																															1.89781	234.309	11737.3
9.7011	2281.86	148271																															2.2569	153.219	6283.99
6.92393	342.586	12937.3																															1.44639	370.915	60270.3
15.5122	407.132	7064.72																															4.23638	569.845	38283.6
3.18185	410.98	21117.9																															1.12276	383.779	74673.1
3.42464	289.768	17274.7																															3.55172	442.681	34866.2
3.36049	195.054	7620.7																															1.25339	1650.24	1261736
4.09598	205.776	5111.57																															2.49147	158.908	5126.03
7.86447	428.94	15798.7																															3.01565	371.966	25921.9
4.77897	413.884	23964.8																															2.12264	179.822	9182.17
2.75362	237.785	10370.4																															3.02718	174.397	6895.17
4.51799	158.495	4070.59																															3.90281	190.176	5249.58
4.66611	205.263	6737.44																															1.22763	362.317	80046.2
4.2541	189.972	6544.23																															4.22707	343.477	20058.6
5.42137	177.604	4135																															4.7699	213.084	6395.71
9.12299	871.698	44043.1																															1.82896	315.568	26742.1
10.7473	612.431	20968.1																															2.66591	185.044	8801
9.40841	612.102	25783.9																															7.32313	292.389	6836.02
10.642	1282.54	112299																															3.94051	226.066	6023.74
4.47232	588.148	54367.5																															2.31768	351.255	36831.2
23.9823	229.094	1401.11																															3.06323	578.532	75577.4
14.7481	326.124	5030.08																															2.45358	214.547	14263.5
4.27158	352.998	12536.4																															2.36094	238.076	14883.9
4.60376	262.559	10604.3																															3.26865	227.224	10847.5
2.9742	232.926	13620.8																															2.91813	1398.56	504115
7.40797	780.385	61187.7																															8.51454	188.424	2928.41
6.36957	453.205	22880.5																															3.33411	209.374	9774.95
3.84392	152.961	3251.74																															2.30621	174.285	9188.74
4.94499	311.856	14517.2																															4.19108	243.446	10259.9
3.65895	258.375	7597.04																															2.48104	223.616	15234.8
10.2863	596.095	26088.9																															2.02193	171.895	2.02193
2.97171	159.966	6429.88																															2.23715	385.53	2.23715
10.0295	477.788	14065
9.95072	285.464	5416.51
12.5621	316.162	3657.88
5.37423	177.909	3150.54
2.90538	157.342	6178.84
5.27386	183.937	4485.93
[truncated: 28 more columns]

## Sheet: species 300 degrees
L:W ratio	Lenght	Area	L:W ratio	Lenght	Area	L:W ratio	Lenght	Area	L:W ratio	Lenght	Area	L:W ratio	Lenght	Area	L:W ratio	Lenght	Area	L:W ratio	Lenght	Area	L:W ratio	Lenght	Area	L:W ratio	Lenght	Area	L:W ration	Lenght	Area	L:W ratio	Lenght	Area	L:W ratio	Lenght	Area	L:W ratio	Lenght	Area	L:W ratio	Lenght	Area	L:W ratio	Lenght	Area	L:W ratio	Lenght	Area	L:W ratio	Lenght
Graminoids									Wood & twig from tree															Twig from shurbs												Needleleaf (trees)									Broadleaf trees			Broadleaf (shubs)
Carex	Carex	Carex	Calamagrostis	Calamagrostis	Calamagrostis	Eriophorum vaginatum	Eriophorum vaginatum	Eriophorum vaginatum	Pinus sylvestris (w)	Pinus sylvestris (w)	Pinus sylvestris (w)	Pinus sylvestris (t)	Pinus sylvestris (t)	Pinus sylvestris (t)	Pinus sibirica (t)	Pinus sibirica (t)	Pinus sibirica (t)	Picea abies (t)	Picea abies (t)	Picea abies (t)	Betula pendula (t)	Betula pendula (t)	Betula pendula (t)	Vaccinium myrthillus (t)	Vaccinium myrthillus (t)	Vaccinium myrthillus (t)	Ledum palustre (t)	Ledum palustre (t)	Ledum palustre (t)	Oxycoccus palustre (t)	Oxycoccus palustre (t)	Oxycoccus palustre (t)	Chamaedaphne calyculata (t)	Chamaedaphne calyculata (t)	Chamaedaphne calyculata (t)	Pinus sylvestris (N)	Pinus sylvestris (N)	Pinus sylvestris (N)	Pinus sibirica (N)	Pinus sibirica (N)	Pinus sibirica (N)	Picea abies (N)	Picea abies (N)	Picea abies (N)	Betula pendula (L)	Betula pendula (L)	Betula pendula (L)	Vaccinium myrthillus (L)	Vaccinium myrthillus (L)
5.76923	600	62400	24.96	624	15600	4.91642	1244.7	247499	2.31611	150	4300.61	2.40524	1125.25	413456	5.92938	239.031	15058.7	2.47231	506.225	81409.2	1.40431	535.504	160380	2.89	289	27856	10.9355	339	7371	2.58333	964	4904	4.39474	258.35	23458.8	1.64809	348.267	57800.6	4.46781	292.682	15058.7	2.21661	1262.86	565078	1.38378	909.024	469003	2.03269	1368
6.41667	924	133056	23.7059	806	27404	6.97072	400.412	18064.7	3.62089	1218.11	321848	1.98451	321.05	40792.7	4.04089	193.013	8996.84	1.76259	150	8369.89	6.1043	289.814	10806.7	1.45283	154	18443	4.74545	261	11022	3.35897	676	3106	12.2908	2110.63	1.19893e+06	4.17856	855.494	137562	5.10718	241.876	8996.84	3.07695	333.311	28357.5	1.22176	146.626	13820.6	1.42519	962
9.5	150	608	48.3333	2900	174000	6.8923	323.676	11938.4	9.36827	343.544	9894.55	2.63292	442.676	58455.1	1.75134	270.048	32692.2	1.91097	423.714	73787.2	3.98016	217.114	9301.77	7.85981	841	91726	6.33333	456	32714	3.3	1074	4383	4.7819	323.368	15388.6	1.22558	270.366	46844	2.25254	306.206	32692.2	1.25181	340.928	72925	1.177	195.298	25451.4	3.2118	3048
14	1400	140000	23.44	1172	58600	4.70277	1762.94	224627	2.82433	240.918	16140.4	3.39727	624.479	385913	1.77169	624.479	14050.6	1.88563	486.088	98415.8	7.2713	295.833	9452.92	1.48214	332	69818	6.5102	957	134951	2.72642	809	29647	2.17027	264.601	30585.3	2.12868	530.294	103756	1.92103	185.383	14050.6	3.3884	144.122	4814.52	4.02221	613.942	73600.6	1.85749	756
12.1739	560	25760	21.7059	1476	100368	11.7424	1547.05	56605.8	5.09223	274.298	11604.5	5.09502	133.794	41832.3	3.58226	150	11646.6	2.1648	314.573	35901.9	1.55689	155	7904.6	5.33333	880	128565	12.3261	567	71657	2.07778	743	8162	3.98536	729.276	204630	8.44465	386.841	13917.8	1.8414	165.245	11646.6	2.30341	150	5175.98	1.52985	568.899	166154	1.41265	469
32.4286	681	14301	18.1818	1200	79200	17.6322	1215.6	11674.2	3.51724	188.443	7929.57	1.51867	138.384	9903.75	4.14396	193.175	39233.8	3.54147	578.821	74301.1	8.7327	297.89	7980.84	1.69747	1341	908605	3	258	25266	7.31579	899	23857	7.5176	209.542	13725.9	2.82413	150	3602.68	3.82277	436.992	39233.8	1.28631	211.219	27240.2	1.18156	235.148	36755	2.44	854
13.2436	2066	322296	34.2593	2775	224775	5.40126	227.285	7511.61	2.60669	190.385	10921.1	4.10284	153.754	4525.36	1.69914	686.659	21629.2	1.1815	228.844	34812.3	4.52589	201.28	7030.55	2.67727	1767	1044698	3.26471	150	3306	9.34146	317	14814	13.5556	175.085	11272	10.156	1519.73	178608	7.42826	452.292	21629.2	2.78962	150	4230.95	2.66288	303.302	27132.5	1.105	221
1.85827	236	29972	21.0238	2649	333774	12.8824	1677.39	69273.7	2.50192	696.067	152096	5.22585	957.387	137755	2.26035	150	38638.4	2.16145	340.932	42235.9	4.22023	429.497	34329.9	1.1799	1174	1026156	2.95522	198	7952	5.9881	712	35334	9.70208	1188.18	419483	6.1592	225.63	6491.66	3.17038	394.931	38638.4	2.59895	205.325	12740.2	1.2235	167.509	18012.1	3.95789	376
4.63813	1192	306344	7.1	142	2840	16.0739	430.86	2754.91	7.4683	171.487	3092.7	3.02584	200.477	10432.1	3.19773	145.922	6262.96	1.67305	708.662	235754	3.73893	269.528	15259.8	3.04167	730	138198	5.67606	403	18635	8.73684	318	25069	5.1564	542.666	122629	3.00845	933.433	227464	3.22483	160.361	6262.96	3.7241	182.429	7018.72	1.5402	594.368	180146	1.36534	654
15.3619	1613	169365	20	320	5120	9.79843	190.795	2917.89	4.0141	131.265	3371.35	3.57265	135.082	4011.45	2.91189	152.19	40390.5	2.05855	578.843	127835	2.91238	156.357	6592.86	3.60714	2020	1015761	8.3125	532	34073	6.20769	1217	67738	10.5558	155.076	6351.02	3.28787	510.892	62349.6	2.79142	378.885	40390.5	1.24772	344.253	74598.2	1.42154	150	6050.03	1.7874	681
14.973	1108	81992	11.7771	2061	360675	3.53037	1170.22	304653	6.48694	909.469	100144	3.41404	544.358	68169.6	5.54004	826.469	13739.1	1.35121	251.881	36877.2	8.69526	616.711	34353.6	4.82759	2240	829610	3.67308	191	191140	11.4727	2389	27008	2.38563	150	11576.9	1.36572	281.885	45695.3	3.97722	263.769	13739.1	3.4903	150	4117.91	2.76068	701.968	140188	1.91748	395
7.51748	1075	153725	10.3273	568	31240	9.85168	909.458	36937.6	3.34082	307.048	22164.2	3.78306	401.606	33484.8	3.8639	402.572	7472.18	6.16849	498.513	31642.1	2.09782	579.691	125810	3.46571	1213	322525	7.32609	337	15474	3.22368	662	11776	2.85578	188.921	13995.4	4.33931	150.522	4100.82	6.18379	242.553	7472.18	1.27886	202.028	25066.3	1.27083	415.013	106445	1.31268	445
12.9182	2054	326586	11	187	3179	7.69237	350.295	12528.5	1.81345	271.864	32010.1	5.09245	123.716	2360.6	1.7719	150	10032.6	1.15388	253.135	43614.6	5.41775	283.267	11632.1	4.83705	2167	800901	5.90476	496	40661	5.25	355	6055	7.17089	150	8995.53	3.49403	201.27	9105.93	2.03602	161.269	10032.6	2.12512	371.941	51127.6	2.15292	204.99	15329.5	2.69286	377
2.92126	371	47117	61.1	611	6110	5.89517	380.987	19338.3	2.27109	165.435	9464.75	2.49732	183.853	10630.6	3.00464	182.736	18248.7	2.37024	559.316	103660	1.81263	205.023	18213.2	4.56771	1754	579977	5.06818	223	9440	5.37931	419	96395	3.18873	583.076	143206	1.95852	763.056	233493	5.68196	363.344	18248.7	1.29675	319.707	61906.7	1.98403	432.714	74121.1	3.7533	852
14.4194	1788	221712	7.36	184	4600	13.316	844.952	42109.7	1.9229	173.078	12235.4	2.50294	280.485	24686.4	3.58701	150	25670.9	2.39872	180.132	10624	5.07408	502.877	39143.2	3.51397	1258	377827	6.21127	441	22840	13.9351	275	12635	5.37652	248.49	25695.9	2.99059	356.75	33424.3	3.39572	333.151	25670.9	1.40254	267.398	40039.6	1.39428	402.844	91414.2	1.97122	274
22.2222	2000	180000	8.40909	555	36630	7.60728	435.418	19573.5	4.88652	458.053	33722.7	5.28661	680.069	68709.8	3.58257	175.324	5265.35	1.41484	144.642	11613.7	2.42889	150	6478.51	4.97191	1770	535311	3.4918	213	10625	21.6486	409	26317	7.06771	345.516	33909.3	6.78523	154.934	2778.57	3.99751	163.706	5265.35	1.17512	282.258	53247.6	2.23612	183.744	11858.2	2.66071	298
17.3333	1300	97500	1.39535	150	10320	4.99708	403.759	25622.3	1.99729	216.676	18461.6	2.22176	205.002	14856.3	1.75539	445.092	240557	2.55391	313.265	30179.2	8.53704	334.208	10275.7	3.13125	501	86150	8.53333	384	755047	13.3824	372	19014	3.14593	243.344	26794.7	3.61999	316.076	21675.2	5.55079	1303.89	240557	2.34435	150	6286.62	2.00079	150	7346	1.14375	183
4.77311	568	67592	8.36	209	5225	9.4673	905.547	68027.7	8.52555	144.329	1918.97	2.70788	603.079	105490	1.1743	157.064	22746.4	2.58195	285.605	24812.6	5.7981	719.643	70151.7	2.78458	1228	393900	5.59155	397	22299	5.68639	401	14822	5.7386	203.353	19075.4	2.87517	718.784	141131	2.15679	249.929	22746.4	1.19712	216.696	30807.4	2.85054	256.734	18160.6	1.30636	226
20	1700	144500	5.47059	150	1581	15.1357	220.012	2511.76	4.56653	457.219	35954.5	1.66491	606.662	173617	4.58642	174.339	58264.6	1.46684	358.551	68834.7	4.94344	493.929	38760.7	6.86239	1496	346863	3.36364	370	44172	7.68889	680	37292	2.93183	197.194	20033.6	4.52894	686.687	81773.3	4.4689	575.782	58264.6	2.47793	177.095	9940.56	1.94625	193.418	15096.8	1.01603	317
16.6765	1701	173502	25	1600	102400	14.8569	1415.73	31113.7	14.7423	435.177	10089.1	1.99789	278.572	30506.5	1.24448	456.797	20133.5	7.89156	230.844	5303.47	4.63882	150	3097.96	2.97351	449	59114	6.51111	293	14204	3.93662	456	134329	6.50335	290.696	39993.6	3.29261	165.602	6541.6	2.00127	226.5	20133.5	2.20431	1640	958314	1.94469	1090	479836	3.94608	805
4.18868	444	47064	25.9885	2261	196707	21.9641	1254.09	11394.2	3.31582	138.923	4571.37	2.79152	103.024	2986.24	2.90593	173.051	270570	1.21955	200.515	25893	2.50254	487.896	74707.3	1.66074	1400	1145894	6.65217	306	10664	5.3913	1254	116510	3.11769	150	4798.75	3.87524	182.113	6721.67	3.60383	1114.23	270570	1.04816	200.523	30129.2	1.27164	184.277	20973.3	2.10959	308
4.42614	779	137104	11.7636	647	35585	18.1031	751.132	24477.5	3.34657	204.114	9777.57	1.34391	791.133	365778	1.73556	403.494	2672.11	1.63627	353.357	59932.5	3.40169	653.893	98720.8	1.50671	449	122916	4.89899	485	27650	11.1471	658	340964	9.37449	151	5254.84	3.58569	168.438	6214.33	1.39332	150	2672.11	1.3913	494.258	137903	1.89724	156.327	10116.7	1.04564	252
26.7429	936	32760	10.3208	547	28991	7.30494	150	1982.07	18.0916	366.102	5818.7	4.29265	559.942	57365.5	3.42014	150	4813.21	2.91509	656.316	116055	5.30849	422.694	26434.5	2.66952	2181	1407766	3.67273	202	8746	3.15546	1189	221436	13.3306	183.424	15058.7	5.19881	390.498	23036.9	1.45825	150	4813.21	1.22509	343.193	75509.1	3.58903	185.158	7502.4	2.92893	577
7.7931	1582	321146	10.7	642	38520	6.05827	433.33	24343.4	7.07276	187.018	3883.95	1.63693	351.964	59437	2.04887	230.988	1364.31	2.45851	334.584	35762.6	2.63521	295.729	26065.2	4.77885	994	208041	6.31933	752	67565	4.47222	264	17216	4.82629	241.276	33705.6	8.28108	388.126	14287.2	2.22177	150	1364.31	1.75499	272.983	33349.4	1.83783	316.724	42869.4	3.47706	379
2.90299	389	52126	9.07143	762	64008	8.65588	1338.23	41070	1.96894	142.561	8107.01	1.84365	321.87	44133.8	1.72112	189.115	18554.9	1.22771	213.679	29209.2	3.08631	193.416	9519.96	3.72093	800	140363	4.21687	350	23416	7.7449	1351	148970	2.79641	193.176	11325.9	2.8187	255.315	18163.2	1.3057	175.633	18554.9	1.66375	271.606	34824.1	2.13183	167.754	10367.7	1.37267	221
11.8361	2166	396378	13.0549	2376	432432	6.85458	367.008	15433.3	1.87914	211.281	18657.4	1.23174	183.212	21403.1	3.12443	1070.84	6382.56	1.35619	149.643	223.442	7.02216	240.797	6485.09	1.52995	332	3254	2.72193	509	91207	8.82353	390	3290	4.03286	217.246	29724.4	3.47638	956.342	206628	2.1668	150	6382.56	1.46874	434.999	101187	1.63615	233.779	26234.8	1.40456	493
29.8696	2061	142209	10.7665	1798	300266	9.82035	854.744	58430.2	7.86799	187.148	3496.22	1.43398	285.87	44759.4	3.11028	1116.13	17638.8	2.07513	226.608	19435.5	4.74901	213.919	7568.12	2.30769	300	41305	10	950	97373	10	595	65983	3.65514	1204.25	669311	1.81189	737.376	235687	4.82115	329.053	17638.8	1.63912	150	8552.58	1.07114	209.497	32181	1.78716	529
10.42	1042	104200	13.8222	622	27990	12.7227	880.591	47869.2	7.80307	537.561	29085.6	1.2755	378.151	88052.1	2.72536	694.912	11109	3.72127	484.07	49455.7	5.05046	160.241	3993.05	2.5	300	32818	4.5	405	34848	8.08974	615	43245	6.63425	337.253	63345.9	2.54052	330.887	33847.6	1.84584	161.581	11109	1.95411	518.974	108251	1.81434	223.489	21621.3	1.93939	320
4.37037	354	28674	4.64615	302	19630	12.0868	721.376	10376.9	3.20029	230.392	13026.7	3.01597	393.105	40242	1.93014	150	38294.1	9.88837	285.685	6482.46	4.1331	155.413	4589.77	2.73333	410	70520	5.925	237	10141	2.81818	2147	22761	7.89209	297.197	35788.9	3.24857	223.885	12118.5	4.03959	443.802	38294.1	2.22189	718.661	182564	2.52527	211.86	13959.9	1.71617	520
3.21429	360	40320	34.125	1911	107016	12.7841	1390.47	33356	4.27625	655.433	78901.4	2.44326	419.522	56575.6	2.80901	220.715	20824.8	2.09739	347.971	45341.7	4.49432	625.029	68269.5	3.40315	2161	1104049	6.01471	409	16989	3.53125	666	148554	3.8794	156.053	6864.94	2.19321	495.167	87803.6	7.5718	448.069	20824.8	1.19709	203.113	27066.8	2.53851	150	6683.56	1.34465	515
8.22727	362	15928	6.86905	577	48468	7.54142	715.847	31002	13.509	257.589	3857.67	1.36344	374.372	80735	1.46522	150	5541.37	2.68419	1592.53	742084	3.45228	469.507	50149.7	1.4466	447	912381	8.09524	340	33213	3.02	950	2068	4.01865	209.78	23698	4.0771	444.502	38061.4	3.03491	146.331	5541.37	3.07127	387.564	38411.1	1.14252	150	11091.9	1.44681	748
7.61176	647	54995	7.72222	556	40032	6.76987	2175.02	296495	2.9417	129.623	4485.93	2.43982	395.28	50296.9	1.34206	283.193	37426.6	4.37826	379.674	25858.9	3.13981	336.12	28260.2	1.52358	323	52317	4.60714	387	33542	8.53488	1373	64477	4.79818	181.433	18257.9	3.75356	294.223	18113.3	2.66764	356.541	37426.6	1.32118	162.703	15736.9	2.12725	315.511	36753.6	1.49669	452
12.9388	634	31066	4.28485	707	116655	5.70739	505.601	35177.7	1.62297	520.103	130906	1.16316	213.423	30756.2	3.24624	172.966	13541.9	7.64969	306.286	9631.68	4.7333	181.593	5471.71	1.31061	346	102843	4.67347	458	60035	1.375	374	5229	11.553	593.138	77464.8	5.06015	680.191	71810.4	3.98478	262.119	13541.9	1.58539	322.891	51649.4	1.61566	174.802	14853.7	1.29588	346
14.7303	1311	116679	6.53659	536	43952	6.12863	375.587	18077.8	7.16483	326.451	11682.1	1.06985	266.562	52163.3	1.51347	150	9876.15	5.14609	316.083	15248	4.57946	593.402	60391.2	2.60606	1204	445064	5.7	285	20367	15.3478	654	9821	10.7711	659.944	79348.3	1.66016	354.151	59335.8	2.04811	160.482	9876.15	2.29938	442.597	66910.5	1.78373	152.932	10298.1	1.68465	406
22.119	929	39018	9.54098	582	35502	25.0703	1207.08	7831	1.22749	266.489	45439	1.53004	484.39	120442	1.93027	157.836	17942.4	1.4218	195.712	21158.7	8.94873	535.188	25138.6	5.78189	1405	306391	12.9556	583	14346	8.60606	321	51610	14.1166	275.996	38848.7	1.70531	158.788	11612.4	5.72053	361.503	17942.4	1.91144	525.557	113493	2.4535	654.461	137111	2.44275	320
20.0417	481	11544	29.6296	1600	86400	7.60393	409.038	17281.3	5.5974	220.045	6793.96	7.092	142.918	2262.03	2.23734	162.735	3776.18	1.49628	949.269	472993	2.54395	169.343	8853.57	4.17778	940	207784	11.2558	484	16238	4.64384	427	6695	6.73344	157.901	14594.7	7.12275	176.281	3426.55	3.7763	150	3776.18	1.28645	458.842	128536	1.83193	154.796	10273.1	1.78974	349
8.36667	753	67770	17.5258	1700	164900	5.46085	399.887	22998.8	3.13285	206.533	10693.7	1.63007	296.336	42310.8	1.649	148.192	5137.86	1.62976	146.005	10273.1	3.36569	283.765	18790.2	3.54817	2136	1593476	4.52	226	8291	4.59596	582	8988	8.31998	268.736	10727.9	4.30742	193.459	6824.19	3.98997	161.558	5137.86	1.57196	320.611	51357.6	1.79509	899.103	353690	6.1	671
16.5424	976	57584	7.55714	529	37030	20.5877	1276.32	13453.9	3.63476	593.695	76162.3	1.60888	186.194	16923.8	1.77001	150	22693.9	3.62308	1110	267090	10.597	160.523	1909.78	1.49661	1323	1167321	4.1039	316	22343	8.81132	505	11505	11.8484	150	10019.4	1.49918	339.145	60257.1	2.14847	249.158	22693.9	2.78848	150	5667.55	2.42336	179.581	10451.8	2.47619	364
22.8841	1579	108951	10.1954	887	77169	8.70166	166.776	2510.44	7.20752	374.971	15321.6	4.13874	480.649	43840.7	3.88143	162.954	20675	1.1223	153.639	16519	4.96453	948.166	142226	1.08621	441	161291	3.09375	198	10175	3.09091	405	14044	5.68917	307.039	30189.7	5.70774	420.381	24317.1	1.99566	229.203	20675	1.29714	150	10375.6	1.7971	194.455	16525.5	1.225	392
1.74719	311	55358	3.06207	444	64380	7.0547	322.71	11594	5.59926	816.479	93508	1.39513	446.955	112461	5.40924	292.775	16231.1	1.69533	150	9105.93	2.74373	411.246	48412.1	1.81915	513	106320	7.50769	488	31844	9.6	170	20462	1.89948	156.201	4472.79	1.97348	173.218	11941	3.24267	258.869	16231.1	1.41249	150	9669.8	1.30511	305.412	56132.7	2.09286	586
10.0857	706	49420	11.8889	321	8667	10.1811	1769.64	225963	3.37808	513.732	61361.2	2.69402	137.36	5500.62	4.09684	1040.84	25622.3	2.92275	485.448	63326.2	1.54972	373.656	70758.9	1.38577	370	80782	3.98734	315	25247	3.7619	359	15127	4.22091	530.167	103498	2.03238	219.239	18574.6	4.31756	375.304	25622.3	1.62002	150	9154.56	1.42142	419.692	97326.2	1.06527	408
5.07143	426	35784	5.74359	224	8736	6.14718	150	1656.1	3.78283	210.749	9221.6	1.4273	191.131	20101.9	12.8645	160.394	47206.8	1.08892	633.987	289905	7.9292	603.111	36029.4	1.16779	348	80829	6.29787	592	60411	10.2063	888	46175	10.1985	251.385	31916.8	1.29825	155.832	14690.7	2.92687	419.429	47206.8	1.26938	658.831	268563	1.70866	904.343	375925	3.78082	552
4.07865	726	129228	3.93506	303	23331	18.063	1213.89	11289.1	4.29911	968.887	171497	3.30735	261.787	16274.5	3.22226	163.478	11232.6	1.71131	253.716	29543	3.10976	547.063	75585.3	4.61321	489	44313	4.75	304	21413	3.38596	160	33539	5.49551	150.356	9303.09	8.20903	1069.41	109417	2.17064	176.193	11232.6	1.21597	232.521	34921.4	2.70841	169.785	8359.37	1.68543	509
25.6825	1618	101934	5.31646	420	33180	29.3906	1222.77	7278.96	6.04257	371.147	17904.3	2.26783	883.734	270472	1.58127	169.329	4852.64	1.73978	1316.3	782181	6.7198	788.602	72685.8	3.18577	806	139015	5.20139	749	92779	4.90268	325	39371	4.35916	261.264	27737.1	7.55271	150	1591.7	3.06261	150	4852.64	2.88026	474.264	61333.6	1.75716	320.332	45864.8	3.24545	357
5.31395	457	39302	6.18705	860	119540	9.20162	1755.93	113297	1.18388	270.248	48451.5	1.42604	238.034	31205.7	1.89831	250.757	293184	4.76626	404.608	26976.1	3.75377	168.841	5964.6	2.50694	361	40323	3.65476	307	20049	3.98571	167	10667	7.83789	307.96	6511.37	1.57207	566.661	160422	1.57073	765.731	293184	1.12208	150	13478.8	1.205	150	1512.84	1.40441	191
26	1300	65000	14.5909	642	28248	4.80642	150	2661.59	5.96062	276.513	10074.6	1.8224	413.498	73687.3	3.91824	437.542	7811.28	11.8571	1374.68	125174	6.92313	193.896	4265.12	2.56923	334	32603	3.02804	324	30714	0.681439	346	350906	3.11111	204.628	24407.8	4.83824	420.554	28711	2.43612	155.656	7811.28	1.95731	256.521	26404.3	2.16119	233.733	19853.5	1.84932	270
7.5625	150	1936	26.2267	1967	147525	19.4787	1153.78	7154.1	10.7502	240.009	4208.6	4.71057	146.593	3582.96	2.44125	145.501	12970.2	1.24768	451.739	128458	3.77946	379.473	29924.2	2.18182	240	29047	2.34074	316	29024	9.08333	858	47247	4.18832	150	10992	4.33093	232.246	9781.52	4.85819	283.247	12970.2	2.62593	533.793	85222.2	2.09019	148.178	8250.28	2.20408	216
13.7059	150	3961	3.66874	1772	855876	10.8795	436.606	13761.4	5.33824	179.856	4759.32	6.20889	128.493	2088.53	3.64988	152.671	7376.23	1.94847	342.962	47411.8	1.85377	177.222	13306.6	1.78977	315	55081	4.81301	592	66311	8.06818	527	237991	2.83405	193.542	8845.69	1.69401	188.96	16554.4	5.7559	232.504	7376.23	3.75175	175.578	6453.54	1.31446	177.966	18924.3	1.51989	535
5.19355	161	4991	29.1045	1950	130650	9.91864	156.526	1940.01	3.23795	631.427	96708.5	1.74776	599.039	161257	1.77497	567.936	4914.42	3.80007	171.444	6075	8.66893	354.594	11391.6	1.13478	261	62615	3.26415	346	21098	9.05128	833	52028	4.1724	159	7552.35	2.32003	150	6244.56	1.79169	150	4914.42	1.34069	150	11625.6	1.54895	150	9261.03	1.20122	197
9.69231	252	6552	5.73684	545	51775	11.7104	339.461	7728.48	5.18699	362.306	19875.9	2.34734	317.935	33821.3	2.10932	202.729	7373.6	5.00424	454.35	32399.1	1.16697	148.415	14824.7	1.69774	1202	780608	2.40164	293	35234	10.2564	1580	125327	8.39955	274.291	4065.34	7.34412	760.161	61796.3	2.74317	160.481	7373.6	1.49419	1163.72	711837	1.05647	467.633	162571	3.23404	304
0.817778	184	41400	26.9107	1507	84392	10.4326	337.65	8582.82	1.97119	239.092	22776.7	2.47532	382.469	46414.2	6.94783	152.074	313675	1.76564	357.158	56742.5	1.14278	302.593	62927.9	1.84298	446	75702	2.94118	350	26031	1.81752	1144	6459	7.28399	201.409	23663.9	6.41528	157.617	3041.45	1.57109	792.127	313675	2.69763	154.288	6930.66	1.42274	247.189	33730.6	3.17431	346
5.5625	178	5696	21.4362	2015	189410	10.982	1371.17	36397.4	6.76395	369.968	15893.3	1.46804	266.842	38094.3	1.66302	282.472	45809.6	5.35178	422.817	26236.1	2.80781	387.798	42066.3	2.25688	492	98525	2.7393	704	170509	4.11111	209	94329	6.93705	179.603	7264.51	1.70725	316.884	46194.7	3.71186	465.297	45809.6	1.06122	164.181	19949.5	1.24015	150	10444	1.67521	196
5.46154	142	3692	4.05143	709	124075	2.41029	206.434	13886.3	3.63651	244.337	12893.9	1.79925	169.486	12539.1	7.30102	289.471	16912	1.66812	194.705	17849.1	2.17795	471.426	80143.5	7.23529	1476	317891	2.92593	158	5555	2.1215	375	146712	5.16182	1353.61	643223	2.01399	161.973	10231	5.41429	341.447	16912	1.24878	231.941	33834.4	1.26479	311.481	60246.6	2.76761	786
14.8929	417	11676	8.21918	600	43800	11.138	652.006	29976.8	2.76882	150	3446.27	1.51679	1364.2	963657	1.19566	150	88439.8	1.21422	396.051	101460	2.19067	398.558	56950.2	1.17564	415	148346	3.15942	436	50177	1.65672	779	92739	6.65862	315.778	62126.2	1.19243	150	12318.2	7.52255	920.369	88439.8	4.49691	249.367	10860.6	2.18177	257.613	23889.9	4.92228	950
6.92308	180	4680	16.6346	865	44980	7.88294	176.633	3108.48	2.29017	145.412	7251.36	2.38855	420.497	58141	2.62601	439.536	30034.6	1.91731	531.743	115825	2.20732	393.318	55044.4	1.22472	545	213249	3.99346	611	27027	3.31849	225	26138	5.39334	1150.76	575109	5.57031	627.701	55554.3	2.95772	336.314	30034.6	8.46765	150	1510.21	1.28835	329.641	66242.8	1.34857	236
4.18605	540	69660	104.444	4700	211500	12.1171	311.494	6289.24	3.56829	317.631	22206.2	6.81186	222.557	5710.92	1.73503	261.122	69332.8	4.588	151.771	3943.1	3.32737	298.252	20997	2.27839	2267	2390654	2.36932	417	62148	8.75342	260	16073	7.70489	310.5	38593.8	1.3257	572.44	194135	3.25841	536.325	69332.8	1.58918	150	8155.65	1.48429	489.918	127005	1.39877	228
13.4167	805	48300	34.7188	1111	35552	7.21478	372.773	15127	5.39591	187.686	5127.35	4.99339	287.729	13021.4	8.27868	204.649	99777.5	2.85491	777.237	166190	3.62097	324.732	22872.6	4.46567	1496	438792	10.1481	548	35027	8.56667	248	305650	11.2746	186.106	11600.6	2.33336	151	5776.64	4.01088	713.825	99777.5	2.21235	371.307	48944.4	2.01221	165.176	10649	2.47458	292
7.74074	209	5643	6.71642	450	30150	7.5823	674.104	47070.1	6.2386	447.021	25157	6.34592	153.235	2906.07	2.94318	169.324	17763.7	2.56479	261.198	20891.9	1.94168	164.561	10953.9	4.53023	974	199408	18.4222	829	37029	6.11905	498	65341	4.59083	185.197	12029.1	3.84515	1003.71	205776	5.07318	338.736	17763.7	1.28999	387.109	91236.8	2.38057	150	5110.26	1.87713	550
22.7143	159	1113	16.9297	2167	277376	14.0039	1536.9	132474	5.18522	136.812	2835.09	1.73201	286.982	37346.4	7.24082	235.761	75208.1	3.77967	215.207	9623.79	5.93267	809.851	86825.8	1.49296	530	147203	1.00498	202	26322	3.71875	737	10617	4.27905	322.827	49921	5.79916	184.854	4627.89	2.08243	446.553	75208.1	1.77189	150	9071.76	1.06136	484.969	174042	2.0146	276
14.8148	1200	97200	12.4364	1368	150480	5.22958	667.98	67011.7	4.93817	166.535	4411.02	11.8072	374.396	9324.12	2.72963	423.412	220050	5.17024	471.981	33839.7	5.43144	583.315	49202	1.02171	706	401587	3.75862	218	10683	7.1875	176	3266	7.08128	167.348	10610.9	1.80855	421.432	77128.4	3.28096	958.774	220050	1.81189	292.692	37134.8	1.31052	340.247	69380.2	1.0083	243
11.0909	244	5368	14.38	719	35950	4.93842	342.993	18710	4.13254	1335.83	339137	3.17805	431.09	45926.6	2.63398	305.629	80005.5	2.34421	345.103	39901.5	2.01121	345.047	46493.1	4.45708	1921	4015874	4.33333	455	38217	1.3254	831	6136	9.7007	158.776	11362.7	3.23309	237.076	13653.6	3.05837	558.162	80005.5	1.29679	147.676	13208.1	1.46272	268.932	38834.3	3.92896	719
8.675	694	55520	18.2115	947	49244	5.10022	675.514	70270	7.08665	154.163	2633.99	3.53742	150.811	5049.8	3.43747	824.677	12148.7	2.84649	517.205	73808.3	5.53447	316.815	14243.8	2.31005	1356	846890	2.94348	677	122920	9.46479	183	18979	10.786	148.274	8210.85	1.24004	586.263	217691	1.34501	150	12148.7	1.24726	213.226	28629.5	1.18825	138.999	12770.4	1.88745	436
5.53846	144	3744	3.07955	271	23848	13.1186	947.728	19730	1.39141	1326.04	992543	2.73529	131	290.475	9.74236	176.327	5465.14	1.30104	245.201	36294.9	4.13993	348.23	23005.4	2.54494	453	67124	6.44444	1450	27242	6.17742	216	15342	14.4447	505.328	105291	2.04965	827.05	262103	2.58223	150	5465.14	1.41782	431.984	103372	1.95025	168.42	11423.2	1.42857	400
18	180	1800	15.6	1014	65910	17.0416	238.889	2630.05	6.5407	200.891	4846.07	2.18201	391.033	55037.8	1.15994	168.071	5651.78	2.61547	222.189	14824.7	2.18679	150	5888.36	4.86256	2052	747081	2.57647	438	76156	6.97015	247	49720	5.75663	203.492	24503.7	5.62141	398.918	22233.8	4.15739	172.964	5651.78	5.29428	223.064	7381.48	1.82309	190.205	15585.8	2.25333	1690
20.68	1034	51700	4.18182	230	12650	7.82432	1376.92	52096.2	9.44928	147.938	1819.08	5.61944	140.531	2760.17	2.44595	536.287	44564.9	2.54222	801.052	198243	4.71024	217.585	7894.09	1.35597	579	241796	5.97101	1236	199568	6.66279	402	18543	4.24237	197.505	11318	4.4448	1216.3	261409	2.94814	409.002	44564.9	5.43207	148.567	3191.28	2.00552	450.427	79453.5	2.20628	492
2.97778	151	6030	17.2879	1141	75306	8.19567	1681.64	109850	8.4938	839.332	65141.3	4.94261	507.828	40979.3	2.2616	150	37494.9	5.58832	1046.46	153904	3.36631	150	3058.53	1.23313	402	145577	3.29341	550	81567	9.67647	206	96277	8.23815	316.971	60584.4	2.87451	439.834	52857.3	2.79167	365.067	37494.9	2.45767	239.377	18311.8	1.28397	150	11438.9	1.88745	436
7.89474	150	2850	3.2125	514	82240	12.8988	1586.09	56601.9	9.17612	263.428	5939.62	1.35403	165.064	15803.9	4.95142	150	34393	1.94822	320.664	41452.5	3.58464	281.262	17332.6	4.09845	791	175878	3.90256	761	16086	4.57009	269	40874	5.10616	253.618	26357	8.14662	179.299	3099.28	2.09178	302.656	34393	1.49506	150.201	11851.6	1.83719	245.745	25816.8	1.34783	403
6.78571	190	5320	4.75893	533	59696	49.8048	1102.63	19172.7	5.39012	182.294	4842.13	6.9084	147.743	2481.52	1.37519	216.415	10206.1	1.3656	317.751	58068.7	1.78043	211.746	19778.6	8.16152	5811	779037	4.11111	407	41124	2.06485	232	9219	23.5281	198.411	28707.1	2.23776	405.459	57699.4	1.65409	146.61	10206.1	2.21551	370.513	48665.7	4.17811	377.768	26826.2	1.46429	246
13.3571	748	41888	4.91379	285	16530	18.31	1128.1	6198.55	3.03538	396.488	40675.7	1.99077	910.044	326733	1.78293	1143.53	17830.7	6.32996	385.406	18430	2.78508	379.113	40531.1	1.00148	676	484709	2.37692	309	35983	4.95652	157	187161	3.79577	205.399	19766.8	1.732	245.821	27401.9	5.3612	348.875	17830.7	1.2954	387.033	90820.1	1.07611	192.968	27177.2	1.93548	300
8.68966	504	29232	6.74468	317	14899	14.4241	765.169	31880	1.60926	479.108	112029	2.14101	742.336	202150	1.64969	149.475	11734.7	2.45298	724.446	168038	1.29417	156.968	829.365	1.02013	152	20468	4.44828	258	9376	4.90105	258	147903	7.68779	144.289	6004.03	3.00811	158.064	6523.2	3.24492	220.187	11734.7	1.7998	150	8457.95	2.18149	201.031	14550	2.56075	274
4.47222	161	5796	12.25	980	78400	12.0754	798.351	41455.1	6.8155	132.834	2033.33	4.02789	401.645	31455.4	1.49458	1120.2	67574.2	10.0998	207.197	3338.49	4.12115	285.975	15585.8	2.64407	312	32031	10.4062	333	8775	5.84981	971	1650	4.76955	412.604	64043.8	4.4136	209.743	7828.37	3.07272	514.171	67574.2	2.00992	229.889	20651.3	1.26327	150	13181.8	2.05785	249
9.63329	874.721	60120.4	10.2703	380	14060	9.44998	665.26	36782.6	8.43077	167.316	12765.1	8.43077	574.658	30764.1	2.90324	222.986	89307.3	7.65026	870.321	327473	2.36493	408.937	17168.3	2.36493	499	90952	6.87143	699	50014	7.79103	931	10561	4.37071	194.385	21681.8	4.37071	291.461	15265.1	3.24592	607.529	89307.3	1.23411	274.221	47856.1	1.45757	150	7485.32	2.02381	255
12.2815	434.695	11187.9	19.6833	1181	70860	18.0141	1786.55	139157	6.82462	846.882	337532	6.82462	911.401	95593.9	2.53497	384.747	4776.41	3.84798	949.458	206768	9.40741	309.258	19521	9.40741	508	25918	8.23529	309	7116	4.44626	283	14680	2.46362	588.903	104271	2.46362	2269.75	1.64237e+06	3.87445	153.502	4776.41	4.17227	152.872	4399.19	2.12205	292.741	43919.6	2.5679	208
12.9871	682.919	22390.2	10.975	439	17560	5.08737	958.145	141729	3.1054	227.424	20572.5	3.1054	1171.94	347363	3.4052	150	37685.5	3.13872	204.033	4000.93	2.70531	318.272	25347.6	2.70531	560	92177	10.875	309	35983	5.31853	1377	3198	9.70188	150	8389.6	9.70188	380.731	11734.7	3.0708	383.856	37685.5	1.38679	197.375	22063	2.79895	433.99	71513.4	2.2891	966
10.6403	1162.39	82721	7.48	374	18700	4.91597	363.964	21163.9	2.38375	1065.91	308559	2.38375	200.826	13288.2	2.62807	306.207	20452.9	4.41321	628.728	255618	3.8913	150	2904.75	3.8913	358	27303	5.6087	529	51473	2.65079	595	15592	1.6269	449.126	71267.6	1.6269	483.953	113067	1.81806	217.589	20452.9	2.54738	804.773	199684	3.423	249.826	34594.1	1.20606	398
12.1834	2358.44	316079	18.797	2500	332500	5.60897	152.02	3235.97	3.04228	162.614	6754.53	3.04228	2015.4	1.04861e+06	7.06245	150	45226	3.0567	456.795	156224	1.40984	141.516	5145.75	1.40984	258	64535	2.62963	227	8662	3.57812	385	5011	5.60563	481.328	158623	5.60563	180.759	4577.94	4.85784	528.897	45226	3.21076	150	4957.79	1.79183	192.763	8881.18	1.1988	199
8.72528	795.448	52129.1	13.5604	1234	112294	9.42279	803.924	53869.3	4.56892	239.247	9839.35	3.46029	136.955	4257.23	3.17108	150	60463.5	8.09355	230.658	5162.83	3.77684	318.792	21133.7	2.08347	1273	816222	4.34646	552	35373	4.02941	1118	4478	6.05447	589.626	206796	4.44061	150.279	3994.36	1.95499	387.948	60463.5	3.70499	343.13	24958.5	2.56978	147.472	6646.75	3.83333	368
7.27718	429.552	18876.9	20.9286	1172	65632	9.35548	619.997	32270.3	4.94753	501.724	39960.7	1.64651	149.368	10642.4	2.98066	783.541	368786	2.91611	688.162	127546	1.25333	234.139	34353.6	5.375	860	133616	4.89189	181	5216	3.5977	1377	9074	6.45092	467.606	149032	2.49197	2261.72	1.61221e+06	4.94256	1523.42	368786	3.48152	534.139	64361.9	2.44672	470.544	71073.1	1.95409	979
3.24385	3529.35	737914	36.4	2184	131040	16.2028	1411.84	28185.3	5.80818	399.382	21568.8	2.99653	373.409	36546	1.8074	569.825	78392.8	4.14737	191.343	6933.28	2.43947	437.024	61490	2.4025	961	363366	7.29167	350	20173	4.59016	468	2168	6.94572	664.683	157087	2.14201	243.054	21660.8	10.86	1041.14	78392.8	2.14535	407.443	60775	2.47989	150	6138.09	1.79275	692
11.7456	199.106	2233.11	28.8261	1326	60996	14.2836	1329.28	24067.4	2.58535	454.037	62625.6	4.94012	131.165	2735.2	2.12775	201.866	8718.19	4.18166	234.813	10355.9	3.6304	612.528	81168.7	2.49383	606	121672	4.98485	329	16725	3.02174	349	25978	1.69521	290.784	28145.8	2.18795	233.049	19496	5.09357	237.783	8718.19	1.33514	605.284	215517	3.33256	182.881	7882.26	1.28924	731
6.36231	184.106	3991.73	26.4667	794	23820	27.1318	370.973	3983.84	10.0139	767.468	46196	2.46497	154.078	7564.18	1.68928	280.835	89286.2	3.93392	150	4088.99	3.34774	486.781	55591.1	1.99199	1243	819498	4.77251	1007	239149	6.48101	328	15234	8.33846	245.154	28219.5	4.99108	497.271	38911.8	3.2529	608.111	89286.2	1.82961	276.449	32806.6	1.53156	423.056	91780.9	2.16484	197
18.017	493.849	9631.68	17.4762	734	30828	10.0063	150	1552.27	5.5041	254.829	9266.28	1.7588	393.487	69140.9	7.53181	287.045	39365.3	2.2845	581.774	116361	3.10352	155.272	6101.29	3.07165	2015	992441	4.96552	1728	560012	8.11538	557	4199	1.48757	156.624	11394.2	3.78103	710.266	104791	3.01824	388.946	39365.3	2.59964	157.957	7537.89	2.97554	234.615	14529	1.70968	318
17.121	435.498	8189.82	6.35294	648	66096	7.94296	421.223	17544.2	5.36508	213.482	6671.73	2.54969	248.386	19004.4	1.21256	150	65961.5	2.8524	700.287	135030	5.48109	210.485	6348.39	3.205	1282	385506	1.96348	699	127761	2.05556	198	42209	12.0196	392.239	84394.2	3.54243	1077.21	257272	2.97752	500.066	65961.5	2.04436	1125.7	486831	2.02468	150	1798.05	4.46875	286
5.84148	412.905	21685.7	14.8434	1232	102256	5.15896	217.672	7213.24	3.7381	125.058	3285.92	1.47633	253.231	34114.4	2.63433	438.718	70284.4	3.65312	257.987	14309.5	6.47706	193.269	4529.31	9.34855	2253	826877	4.84076	1520	361563	2.8	389	118	7.106	451.566	54243.9	3.17715	166.006	6812.36	8.20087	856.671	70284.4	1.60737	215.522	22696.5	1.63662	847.308	344527	2.29388	562
9.27605	169.631	2139.79	18.6364	1230	81180	13.084	716.806	30842.9	7.65306	644.372	42611.8	2.58586	165.508	8319.94	1.31176	280.717	3634.22	5.24393	180.559	4882.87	7.51527	384.827	15476.7	3.39096	1275	517417	9.64789	685	53694	7.91071	426	2751	4.0383	536.375	63096.2	6.36593	640.393	50596.5	5.59262	160.866	3634.22	1.59973	164.102	13221.2	1.86146	513.631	111311	2.16788	891
10.7438	1534.38	160746	13.7656	881	56384	9.45278	546.333	24799.5	2.6412	294.388	25770.8	2.76425	255.964	18615.4	1.55036	151	24198.8	3.57873	191.387	8038.67	2.391	150	6424.62	1.55	465	104075	1.40876	193	20722	5.29508	411	25739	3.34686	150	8054.44	4.22479	196.926	7209.3	3.64949	335.326	24198.8	1.22494	159.704	16353.4	1.95501	190.078	14514.6	4.61029	627
6.09796	522.522	33720.1	10.0571	704	49280	9.14545	824.517	58382.9	5.60349	333.576	15596.3	3.46577	154.153	310067	1.4023	154.153	58356.6	2.02429	235.85	21581.9	4.74977	437.972	31718.3	0.93135	407	155220	4.9375	316	13003	10	422	20315	3.78437	206.292	22022.2	3.56637	677.777	101167	2.66481	444.972	58356.6	1.34196	150	10099.6	3.47804	248.847	13983.5	2.69231	280
5.13642	893.251	92254.1	18.5965	1060	60420	5.2699	679.395	68791.3	1.67969	458.057	98107	4.53502	159.547	5731.95	1.87117	159.547	55408.4	5.60422	651.888	59555.3	1.47543	229.444	28023.6	1.58231	644	186412	6.44444	580	55664	9.05	298	74109	4.41325	227.189	8992.9	4.8381	878.106	125172	2.8516	448.526	55408.4	1.82922	775.591	258280	2.05415	189.553	13737.8	2.47867	523
7.13149	913.74	86669.3	7.55	755	75500	3.43141	332.833	25355.4	7.21761	415.922	18824.4	1.94142	139.957	7924.32	2.74426	422.495	57039.6	7.62161	141.015	2049.1	1.52597	165.317	14066.4	2.93289	437	63360	1.99048	209	26054	3.125	344	10165	10.8318	179.498	14096.6	2.03887	274.534	29033	1.9742	378.651	57039.6	2.11603	392.648	57223.6	1.96401	864.212	298666	1.37456	389
6.32707	746.983	65254.4	16.9804	866	44166	23.109	435.397	6443.03	4.54612	655.391	74207.8	4.96606	221.809	7781.05	2.11227	167.459	124344	1.6927	377.087	65977.3	2.06489	152.783	8878.55	4.68667	703	80457	2.08889	150	5758	6.52941	205	53116	4.7392	308.281	52779.7	4.36787	175.632	5546.63	9.97993	1256.99	124344	5.02637	237.149	8787.86	5.33495	773.381	88053.4	1.23695	616
9.26444	1837.92	157248	14.3115	1746	213012	6.96842	1548.09	95632	2.91172	135.322	4939.39	3.52725	157.922	5553.2	1.64171	150.689	73068.3	1.84666	308.639	40514	7.39273	331.564	11679.5	5.82014	809	109475	3.73077	194	4428	9.35789	415	27058	6.82301	311.851	21930.2	3.51321	356.865	28470.5	11.3555	1027.84	73068.3	1.63936	296.494	42116.3	4.16879	217.519	8914.03	1.89286	265
2.5787	597.389	49537.2	17.898	877	42973	10.2787	1814.56	112941	6.24397	293.966	10869.8	3.6767	167.393	5985.63	3.26854	151	293066	2.26452	414.54	59600	11.8039	449.954	13470.9	1.29876	313	66122	6.85577	713	95667	11.96	288	145340	3.48403	398.499	58785.1	2.41296	158.751	8202.96	5.80424	1471.67	293066	2.44303	161.809	8417.2	1.18744	397.782	104656	1.9096	338
11.5062	868.677	44298.1	15.7805	647	26527	14.6655	1544.35	45021	5.77826	135.974	2513.07	5.91681	209.958	5851.56	1.69058	153.341	64561.7	2.04693	1388.42	739652	5.8181	165.909	3715.72	3.15054	586	89499	4.74684	375	23225	9.35185	270	63638	4.46368	677.909	143156	5.47978	696.102	69449.8	2.63252	465.187	64561.7	1.26101	243.658	36977.1	1.3426	196.848	22667.6	2.7619	290
8.5267	1007.97	81833.8	47.0976	1931	79171	17.9452	1373.29	22436.2	1.52092	197.403	20123	5.5668	150	887.198	1.78588	151.246	60963	7.69816	331.244	11194.5	3.20133	305.669	22922.6	4.67139	1649	515212	9.83673	482	24007	3.58216	427	5860	3.89941	212.718	12167.1	2.6546	170.465	8597.27	2.74819	461.86	60963	1.31564	261.637	40865	1.32883	175.505	18205.3	2.30769	270
5.82911	2163.63	205499	4.13793	600	87000	12.63	1395.56	34327.3	7.30878	435.048	20338.5	4.585	150.246	3866.87	7.10084	176.044	63004.2	1.27853	163.579	16437.5	5.02131	366.39	20997	1.23595	334.792	63873	5.32	266	17460	8.18605	358	20619	5.33592	317.426	42192.5	1.61916	150	8736.6	1.92892	393.366	63004.2	1.83972	290.832	36109.6	1.72348	381.402	66290.1	1.58451	225
8.08346	1981.6	226693	22.7833	1367	82020	4.50584	511.242	27735.8	6.16317	267.389	9111.19	4.24567	591.541	64731.2	5.25037	306.606	94934.1	1.37442	205.851	24214.6	8.41735	445.951	18556.2	2.01198	184.378	8703.74	4.72549	241	9881	10.1167	743	137840	4.44493	449.962	69694.3	2.86439	792.67	172283	3.15956	617.987	94934.1	1.58241	756.782	284258	2.87493	167.134	7631.21	3.34696	184.83
5.3536	448.041	5374.45	16.2338	1250	96250	12.7877	825.251	6348.39	2.79878	555.904	86720.6	3.68797	533.376	60585.7	4.03012	1040.27	4391.3	4.40609	401.509	28736	2.29952	144.847	7165.93	2.71542	177.958	5940.94	4.86207	282	22748				6.07148	229.378	25793.1	2.01046	185.015	13372.4	3.03296	150	4391.3	3.86652	326.562	21662.1	4.95571	854.042	115596	3.27259	289.146
5.64551	545.57	39734.6	9.82353	501	25551	21.4827	963.154	5745.1	7.88345	216.992	4690.98	5.80967	174.389	4111.34	2.14683	344.539	11902.9	1.38698	530.961	159642	4.48766	164.724	4748.81	2.19807	274.691	20255.7							2.18811	576.653	113828	3.28458	963.476	221969	2.8007	206.022	11902.9	2.67645	184.611	10001	2.26755	283.086	27756.8	1.79145	179.822
8.53602	708.222	43363.6	5.5	550	55000	12.2783	927.812	19455.3	6.07094	369.289	17642.7	4.53366	150.667	3932.59	4.30207	150	8523.67	1.12539	266.551	49584.5	3.87262	169.613	5834.47	1.6181	492.795	105866							3.74961	245.06	30799.6	2.24372	294.697	30400	2.51078	165.071	8523.67	1.72634	189.516	16340.2	1.4317	241.832	32082.4	1.64553	413.527
1.84253	1550.98	411983	5.26316	300	17100	9.44985	504.811	21179.7	4.79281	131.807	2846.92	8.8722	292.543	7576.01	2.09608	150	10213.9	7.26685	183.437	3636.85	25.9005	395.837	4751.44	8.76438	278.686	6378.62							1.17234	249.036	39130	6.25405	402.98	20393.7	2.19937	169.123	10213.9	1.74912	233.642	24511.6	1.23473	698.642	310474	1.91762	152.233
17.9401	2075.72	138592	10.6195	1200	135600	17.5537	975.248	7646.99	4.14979	1142.79	247172	6.79288	911.577	96077.6	3.07847	157.941	10265.2	2.43005	307.081	30477.5	4.10662	272.109	14161	1.53083	561.396	150650							9.37818	401.529	85277.4	4.56028	1196.26	246462	1.68325	148.325	10265.2	1.07918	1611.36	1.88966e+06	1.31912	371.166	82024.4	4.06722	301.37
4.73096	252.142	9613.28	23.8889	1720	123840	9.69547	442.705	15876.2	3.35773	162.598	6184.1	2.75248	131.376	4924.93	1.92903	214.128	6545.55	2.00701	1238.09	599853	4.09402	1973.88	747451	2.55998	682.404	123456							3.35269	441.144	79521.8	2.90519	434.132	50951.4	2.94589	156.689	6545.55	1.48382	150	8657.73	1.29905	665.486	267758	1.75582	158.762
4.21357	189.698	4789.55	5.23729	309	18231	10.0289	573.982	25801	2.39208	231.539	17602	2.25433	686.598	164239	1.85561	251.922	6315.53	4.20367	541.778	54840.6	3.66742	298.502	19082	2.23036	400.857	44295.5							5.55984	683.659	183739	2.26988	407.082	57339.2	8.76086	265.419	6315.53	3.14182	348.491	30359.2	2.03035	281.514	30656.3	2.65254	366.775
8.5561	1294.89	146612	13.1622	487	18019	5.42499	1263.32	231058	4.56889	228.673	8988.95	3.06527	1174.93	353708	3.7732	150	6260.33	1.06771	455.816	152832	4.40829	441.376	34708.5	1.83287	457.294	85248.5							2.51298	393.485	33286.3	6.98232	151.258	2573.53	2.41026	150	6260.33	1.15402	240.414	39336.4	4.8113	865.105	122170	2.42472	283.663
4.62496	507.229	41574.7	8.81609	767	66729	18.9273	191.771	1525.98	3.00984	231.643	14001.9	1.81525	145.699	9184.8	2.0355	223.323	60191.4	8.24323	226.928	4906.53	4.2066	552.591	57012	3.3944	1419.9	397978							5.42683	187.449	11147.1	1.73413	243.417	26835.4	2.4844	436.348	60191.4	2.33207	150	6573.15	3.66818	300.387	19319.9	1.78467	264.152
6.02791	1032.08	123976	8.4127	530	33390	5.06738	436.367	9222.91	2.73914	1386.82	551464	4.92242	335.842	17996.3	3.14803	1071.14	3910.24	3.41002	948.648	207273	5.02575	200.422	6277.41	3.2251	558.695	43370.2							11.0911	259.034	26217.7	3.08124	155.196	6139.41	4.95445	157.056	3910.24	2.28829	199.344	13639.2	2.82067	768.461	164430	2.81153	327.376
6.93062	1656.58	219044	16.7843	856	43656	6.63696	581.736	40047.4	3.85949	322.341	21144.2	5.54576	1584.61	355608	3.13727	1117.08	292372				2.69175	274.884	22047.2	4.18343	1611.3	457770							12.6812	153.063	15008.8	4.55711	205.881	7305.25	3.51433	1143.78	292372	2.2487	1274.62	567442	1.82719	150	7594.41	2.48833	213.633
33.0951	1472.28	40081.6	8.59649	490	27930	7.65286	518.703	27612.2	7.34052	302.826	9811.75	2.79185	1187.34	396597	3.7285	295.379	21057.5				3.01067	663.036	114684	1.54388	185.132	16607										4.43233	290.805	14985.1	2.84209	276.044	21057.5	2.43111	170.902	9435.84	1.96317	872.411	304491	1.95709	237.588
3.42226	241.318	8423.78	8.39655	487	28246	11.9769	177.39	2063.56	1.60623	492.326	118519	1.8308	272.004	31739.3	2.73181	679.563	30904.7				2.90704	807.697	176253	2.5545	2581.38	924272										2.36882	488.146	79005.3	1.99184	279.959	30904.7	4.7225	444.052	32793.4	5.30023	787.847	91976.8	1.78591	200.589
13.4621	197.02	1829.6	11.6383	547	25709	7.0095	948.469	100797	2.98433	114.303	3438.38	2.73848	132.225	5014.31	2.64186	173.644	3161.05				13.7221	701.447	28161.6	4.03205	249.206	8652.48										1.86754	287.569	34778.1	4.66723	137.058	3161.05	2.66566	176.573	9186.11	4.13331	152.883	4441.24	1.25021	280.024
15.6668	1354.11	84993.5	3.5082	214	13054	8.00755	370.109	13435.5	2.85141	148.687	6089.46	3.60492	692.188	104386	1.71267	150	29345.9							4.06222	318.304	10329.6										8.24056	366.705	12816.4	5.07211	435.334	29345.9	2.99751	150	4031.16	3.63541	322.308	22442.8	1.87724	299.694
3.83128	672.378	61419	3.12371	303	29391	22.1636	884.193	27704.2	6.15317	137.874	2426.32	2.42175	1254.06	510033	8.5848	228.682	8644.59							1.81162	150.439	9576.48										1.64276	153	9882.72	1.88885	150	8644.59	1.43821	150	574202				1.27473	156.841
8.00361	238.805	4669.94	11.3103	656	38048	8.1343	752.846	25648.6	5.97319	277.598	10132.5	3.91392	139.705	2535.41	1.68317	150	3823.49							3.75216	185.637	4508.28										3.62083	354.573	27270.5	6.36987	176.095	3823.49	3.14951	183.922	8435.61				1.74371	1016.77
31.0825	1512.91	47122.7	5.61842	427	32452	12.1213	389.032	9806.49	5.35003	227.879	7623.33	2.23806	231.785	18853.3	4.1044	183.906	11123.5							2.78798	924.12	210873										3.96763	150	3373.98	2.28272	179.805	11123.5	1.59002	571.444	161300				1.16433	330.004
3.44909	241.198	8597.27	10.7333	644	38640	15.5597	1142.17	65849.8	7.69641	395.526	15964.3	2.98378	296.274	23105.3	2.27287	441.457	295809							2.29038	172.557	7243.47										2.13295	291.352	31257	3.5004	1148.2	295809	3.46323	325.332	24003				2.16847	237.737
12.3285	192.642	1866.4	8.13966	1457	260803	14.5842	1053.91	59815.5	12.9224	353.7	7603.61	2.02771	229.999	20489.7	5.09095	250.597	42768.2							2.53472	153.484	6013.23										2.04996	275.242	29025.2	4.28761	483.196	42768.2	2.12022	231.997	19937.6				1.8076	163.687
15.1713	1347.55	87653.8	11.7797	1390	164020	5.01024	518.415	42129.4	3.03681	231.651	13878.4	1.6606	353.326	59044	3.04772	174.043	32159.9							2.31569	362.399	38734.4										3.13383	168.036	7076.55	1.98102	284.811	32159.9	2.39727	186.081	11344.3				1.49293	186.287
2.84787	1031.47	207839	18.0725	1247	86043	7.7176	1609.94	99931.3	4.77263	135.094	3003.33	3.23269	169.409	6972.72	2.0133	309.263	4457.02							6.32992	1263.99	190712										2.48282	1429.16	646114	3.41277	150	4457.02	2.66946	159.196	7456.4				1.20654	236.125
			12.6296	341	9207				1.96912	493.191	97017.4	2.82775	847.793	199631	1.5921	281.632	30499.9							2.47866	285.357	24783.7										7.80642	518.604	27058.9	4.92737	437.432	30499.9	5.1071	448.705	30962.5				1.90321	202.438
			17.8049	1460	119720				1.69281	573.568	122361	1.69281	217.977	22044.6	3.34621	656.894	9735.51							2.75541	1588.68	679295										2.42201	150	6598.12	1.77144	148.183	9735.51	2.9068	169.801	7790.25				1.43759	343.441
			8.33333	225	6075				3.44024	511.678	134303	3.44024	267.974	16394.1	1.28832	153.116	4865.79							1.70058	682.298	205361										4.93373	500.423	39864.7	5.2033	179.545	4865.79	3.15982	382.073	36284.4				5.45704	224.439
			10.15	203	4060				2.17712	266.786	23960.9	2.17712	305.815	33738.5	5.10094	149.779	5258.78							1.49496	176.255	14502.7										3.71916	712.137	107096	3.50998	153.302	5258.78	1.75135	537.466	129544				1.62999	274.061
			3.77895	359	34105				3.53816	505.189	97278.9	3.53816	555.035	68383.9	1.1868	340.793	75885							1.92275	606.947	136030													2.94048	533.018	75885	1.97699	382.265	58051.6				2.21379	156.966
			14.3256	616	26488				2.09084	297.861	34303.7	2.09084	135.871	6934.6	2.52081	354.002	52566.8							1.79879	326.673	44169.3													4.24162	532.815	52566.8	3.79687	218.882	9910.33				4.01316	251.187
			5.17391	357	24633				7.72755	1043.04	265409	7.72755	264.823	7127.81	3.544	227.284	37459.5							2.22687	301.055	28203.7													4.36106	456.071	37459.5	1.45979	260.777	36588				1.54919	209.057
			6.05435	557	51244				8.14887	1155.74	204320	8.14887	154.527	2301.46	2.2988	184.663	67274.5							1.38403	167.938	10671.3													6.00722	717.328	67274.5	2.28824	180.702	11207.6				1.39233	163.914
			21.3889	385	6930				3.32689	498.648	23812.4	3.32689	179.529	7608.87	2.2301	575.392	10119.3							4.34091	332.594	17750.5													1.68519	147.351	10119.3	2.58973	315.351	30159.5				2.22604	157.423
			13.8485	914	60324				8.15925	1131	178883	8.15925	187.728	3392.38	1.78142	236.861	10468.9							2.23725	152.793	5734.58													3.1553	205.082	10468.9	1.89331	306.158	38882.9				1.67909	472.132
			7.15	572	45760				5.7476	1260.36	293735	5.7476	197.177	5312.67	6.96883	462.152	8197.7							2.95614	849.943	171177													2.9853	176.521	8197.7	3.94335	212.428	8987.64				1.30869	151.472
			20.8548	1293	80166				3.71507	142.584	3477.81	3.71507	297.618	18725.8	4.22532	234.218	84009.1							2.04578	268.845	25744.5													2.86918	553.984	84009.1	1.4597	256.595	35426.1				1.34113	244.963
			16.7831	1393	115619							9.92637	136.706	1478.66	5.61821	207.014	91992.5							1.86673	250.302	24409.1													5.61505	810.976	91992.5	2.38462	173.832	9952.39				1.20834	208.728
			1.48854	1039	725222							5.03365	150.169	3518.56	2.12711	150	222054							3.8578	152.091	4517.48													3.74938	1029.59	222054	1.46735	640.496	219578				1.20359	308.754
			21.0417	1010	48480							2.33418	242.038	19711.6	2.8074	370.083	10826.4							2.56908	166.773	5809.5													3.78921	228.546	10826.4	2.04996	252.531	24432.8				1.85248	185.537
			9.70175	553	31521							3.59179	464.138	47105.6	3.79214	513.149	7662.76							3.06004	792.853	152888													2.13314	150	7662.76	1.85017	295.553	37080.9				1.41053	255.205
			9.95652	229	5267							3.55202	108.049	2581.42	3.17768	564.13	14124.2							2.20459	459.745	72196.8													1.72601	176.181	14124.2	2.92078	434.451	50754.3				2.77361	455.786
			5.98913	551	50692							1.92379	199.626	16269.2	2.53737	594.709	37677.6							1.60059	377.918	51826.8													7.30113	591.822	37677.6	1.66681	375.075	66288.8				1.88149	231.786
			10.28	771	57825							11.7636	211.956	2999.39	1.61902	622.367	17360.2							2.7522	984.598	224270													4.79554	325.574	17360.2	1.28724	544.285	180752				2.84447	626.862
			4.71429	264	14784							2.08138	268.357	27174.5	6.2605	150	9839.35							2.65932	1520.57	662635													2.66329	182.662	9839.35	4.03219	212.597	8803.63				2.11863	289.643
			6.85455	377	20735							3.32429	395.936	37037.5	1.09973	222.323	7917.74							1.39227	194.342	20120.3													2.35481	154.075	7917.74	2.43741	260.364	21843.5				2.85078	252.029
			4.15362	355.641	22419.2							3.28037	484.884	56291.7	3.1194	588.744	9192.68							2.02182	248.792	21756.7													1.8911	148.777	9192.68	2.94318	1356.25	490854				3.35104	540.33
			2.07328	1213.34	281799							4.5783	271.997	12691.5	1.88594	194.506	12813.8							3.00851	833.216	162239													2.88295	216.876	12813.8	3.75621	543.351	61730.5				1.72318	153.234
			11.8348	740.261	33950.1										5.34538	171.763	5763.5							5.0523	1910.33	265873													3.15119	152.067	5763.5							1.43009	330.35
			2.51939	2133.55	348247																			1.53807	552.175	146773																						1.82246	525.52
			17.1186	2488.62	193638																			3.69124	675.439	94714.6																						2.13205	329.782
			2.26798	205.143	13948.1																			2.77019	1139.53	321327																						2.02384	261.02
			6.57755	2602.56	243245																			3.32427	1241.74	324166																						2.08906	209.129
			4.18796	1738.58	480799																			2.65317	1526.09	669014																						1.63733	206.793
			1.23094	1945.67	967596																			1.39066	194.69	20237.3																						1.8741	161.043
			13.7341	1730.5	155387																			2.01209	246.531	21697.6																						3.30859	574.384
			1.73638	413.437	38355.8																			1.86939	151.906	4809.27																						1.51775	225.373
			4.42406	510.999	44140.4																			3.01146	837.261	163281																						1.39868	316.074
			10.4789	279.643	3910.24																			6.01825	1574.15	306322																						2.09888	298.555
			5.96848	1038.47	127919																			2.61751	1783.3	867879																						1.23091	176.956
			8.07479	969.931	53868																			2.41133	1362.48	580427																						3.84115	193.735
			3.13953	803.952	127731																			3.95201	353.374	21705.5																						2.62269	436.569
			8.47493	1557.76	201616																			2.31229	368.838	40497																						1.68819	273.84
			5.17539	333.748	15021.9																			29.0213	657.761	10691.1																						2.32288	367.352
			25.0627	1419.37	54554.1																			6.16106	1266.41	196953																						2.55087	743.918
			5.84222	2120.98	210108																			2.95968	2008.18	599286																						2.08907	332.194
			1.15678	2279.64	1.15723e+06																			2.45056	221.433	12330.1																						1.82383	483.102
			7.29227	804.877	59431.7																			1.6433	484.325	103527																						1.95388	497.353
			4.05256	170.074	3865.55																			1.27878	578.024	167703																						1.65447	163.257
			2.70039	1621.47	127098																			2.97012	255.016	14338.4																						1.71501	435.382
			11.8351	210.863	2555.13																			2.96337	2012.76	601997																						4.61853	779.008
			2.90014	335.565	28538.8																			2.41977	222.087	12545.6																						2.50887	560.726
			2.97897	215.05	11709.7																			1.64772	484.023	103279																						1.20835	404.322
			1.64322	232.783	24785																			1.2832	577.439	166645																						1.54224	176.863
			4.03275	938.394	89901.4																			2.91805	253.354	14235.9																						1.99822	638.01
			7.24857	915.952	85173.6																			2.5016	181.324	9358.29																						1.76579	178.539
																								2.0356	422.88	65772.2																						1.89361	559.183
																								1.53194	179.574	15764.5																						2.02288	457.695
																																																1.18584	151.2
																																																1.73537	427.078
																																																1.99192	634.001
																																																4.5768	784.607
[truncated: 28 more columns]

## Sheet:  species_350 degrees
L:W ratio	Lenght	Area	L:W ratio	Lenght	Area	L:W ratio	Lenght	Area	L:W ratio	Lenght	Area	L:W ratio	Lenght	Area	L:W ratio	Lenght	Area	L:W ratio	Lenght	Area	L:W ratio	Lenght	Area	L:W ratio	Lenght	Area	L:W ration	Lenght	Area	L:W ratio	Lenght	Area	L:W ratio	Lenght	Area	L:W ratio	Lenght	Area	L:W ratio	Lenght	Area	L:W ratio	Lenght	Area	L:W ratio	Lenght	Area	L:W ratio	Lenght
Graminoids									Wood & twig from tree															Twig from tree												Needleleaf (trees)									Broadleaf (trees)			Broadleaf (shrubs)
Carex	Carex	Carex	Calamagrostis	Calamagrostis	Calamagrostis	Eriophorum vaginatum	Eriophorum vaginatum	Eriophorum vaginatum	Pinus sylvestris (w)	Pinus sylvestris (w)	Pinus sylvestris (w)	Pinus sylvestris (t)	Pinus sylvestris (t)	Pinus sylvestris (t)	Pinus sibirica (t)	Pinus sibirica (t)	Pinus sibirica (t)	Picea abies (t)	Picea abies (t)	Picea abies (t)	Betula pendula (t)	Betula pendula (t)	Betula pendula (t)	Vaccinium myrthillus (t)	Vaccinium myrthillus (t)	Vaccinium myrthillus (t)	Ledum palustre (t)	Ledum palustre (t)	Ledum palustre (t)	Oxycoccus palustre (t)	Oxycoccus palustre (t)	Oxycoccus palustre (t)	Chamaedaphne calyculata (t)	Chamaedaphne calyculata (t)	Chamaedaphne calyculata (t)	Pinus sylvestris (N)	Pinus sylvestris (N)	Pinus sylvestris (N)	Pinus sibirica (N)	Pinus sibirica (N)	Pinus sibirica (N)	Picea abies (N)	Picea abies (N)	Picea abies (N)	Betula pendula (L)	Betula pendula (L)	Betula pendula (L)	Vaccinium myrthillus (L)	Vaccinium myrthillus (L)
21.5481	3133.1	224395	7.43607	226.8	2933.7	11.745	2888.1	322005	2.07699	786.883	100567	1.75639	530.9	27985.5	1.63451	451.666	77681.7	1.47353	326.6	83400.5	1.24797	342.7	89260	2.7674	707.9	131589	2.79377	856.8	759492	1.75549	168	12214.4	1.67187	2076.3	1376021	4.2181	181.8	5770.1	3.39975	537.5	35746.8	1.35011	1220.9	828108	1.24797	476.6	89260	2.7674	707.9
2.35116	150	2845.6	7.90196	201.5	1866.4	4.14615	161.7	1913.7	2.56875	842.792	211376	2.12956	709.3	87320	1.81755	1032.15	83584.5	1.358	524.4	55897.4	3.47214	278.5	24624.7	3.15659	318.5	23865	1.38414	388.4	157242	7.0603	702.5	17152.5	1.4289	183.9	18060.7	5.17276	311.4	12002.8	2.6	170.3	8400.1	2.24708	2058.1	1.42887e+06	3.47214	342.7	24624.7	3.15659	318.5
5.80098	355.6	14554	2.78417	309.6	15520	1.69982	372.6	16980.3	3.30042	333.668	25937.7	4.46662	598.4	67523	1.9058	266.058	426637	3.41406	558.5	61365.2	1.50703	424	38709.4	1.61278	153	6763.7	2.19504	298.4	114644	3.74118	1220	57566.6	1.43777	797.1	274904	1.68078	301.7	40938.6	3.8451	196.1	6849.2	5.11857	746.8	44961.9	1.50703	278.5	38709.4	1.61278	153
4.87432	178.4	4961.7	8.48288	247.7	4476.7	5.81421	212.8	5599.2	1.76897	323.808	38672.6	13.9487	351.3	15237.5	1.41064	316.649	37765.7	1.80452	175.4	65107.2	1.21143	671.1	93258.3	1.62131	791.2	264688	1.7931	150	18207.9	8.02063	2837.7	163695	1.23288	556.4	187874	7.23482	536.1	28948.9	5.48706	1738.3	384504	2.43382	231.7	16759.5	1.21143	424	93258.3	1.62131	791.2
7.5078	433.2	18692.9	1.59917	844.2	113066	5.80973	151	1883.5	2.91401	1105.06	317380	1.31229	250.8	61425.6	5.8969	643.327	11366.6	7.46383	307.7	2665.5	2.28888	207.7	113735	3.85977	231.2	10384.8	2.24441	250.4	105887	14.6341	180	1589.1	1.78471	203.1	17475.8	1.95693	827	253798	8.08311	1225.4	111738	1.33246	254.9	35641.7	2.28888	671.1	113735	3.85977	231.2
9.47853	772.5	34115.7	1.91307	354.3	21869.7	14.4162	1229.7	46813.8	2.31441	526.926	69979.5	5.76552	248.2	7371	3.17618	947.191	86344.7	1.63583	355.8	32336	1.38098	448.3	21902.6	2.79479	182.5	5993.5	3.50725	565.8	792505	2.18382	337.4	33742.4	2.58333	150	3263.6	3.4794	971.1	205045	2.30783	253.4	20860.3	2.63695	162.7	7311.8	1.38098	207.7	21902.6	2.79479	182.5
7.98905	218.9	3246.5	8.63446	330.7	5838.4	7.37349	244.8	5674.1	3.99176	172.357	4283.52	3.27009	309	13648.4	2.38194	867.781	227408	2.04836	1073.6	44972.4	2.79315	571.8	41556.3	7.66667	259.9	5157.6	4.51002	289.4	282781	6.43089	553.7	32031.1	2.28437	1168	452063	6.57727	144.7	2258.1	2.69245	150	4562.2	1.21945	830.2	309507	2.79315	448.3	41556.3	7.66667	259.9
3.80042	358	18857.2	2.92217	247.8	15337.3	3.51683	150	4547.7	2.56162	291.904	22927.8	1.4507	515.8	48671	1.57947	383.423	226832	2.05513	241.4	418137	2.6326	429.8	60717.2	5.87572	203.3	4625.3	1.1882	1292.8	686636	11.2994	543.5	13582.7	2.77657	305.7	25103.1	4.05765	204.1	7027.9	4.26257	152.6	4028.5	2.48623	180.5	5074.8	2.6326	571.8	60717.2	5.87572	203.3
2.21364	172	6975.3	3.65236	255.3	12127.7	5.03811	277.6	8191.1	1.86927	434.681	71865.6	4.00155	197.4	33695.1	2.5105	240.606	25344.9	5.08211	167.7	7986.1	2.11724	193	57883.4	7.11583	184.3	3132.1	5.20601	289.3	324940	2.04147	1127.3	329775	1.64048	217.2	21818.5	8.28953	372.2	9190.1	3.20664	173.8	7147.5	2.50259	150	3822.2	2.11724	429.8	57883.4	7.11583	184.3
13.4908	1459.7	104455	13.4821	1017.9	39935.7	5.44648	208.6	5964.6	2.94353	564.316	81983.6	3.37436	187.4	8338.3	2.4919	291.719	10116.7	1.8169	545.2	11837.2	1.15569	153	227.4	1.49393	184.5	9962.9	3.93343	205.8	123670	8.72184	1006.5	66692.3	5.16442	191.6	5340.3	2.76367	171.9	6272.2	3.25277	146.7	4846.1	1.89752	168.5	5826.6	3.29554	790.6	117715	1.49393	184.5
7.99187	393.2	11135.3	8.29952	171.8	2071.4	17.6869	1078.9	31270.1	1.48575	347.32	58643.1	1.97263	550.4	7138.3	1.50917	310.863	35917.7	1.99051	177.1	114529	2.69008	790.6	4392.6	2.64594	459.6	60224.3	2.83174	542.6	228512	2.2774	1560.7	388711	4.00532	225.9	8246.3	1.72083	522.1	112753	6.01511	477.6	27927.7	3.08333	159.1	5098.4	1.49711	310.8	47085.9	2.64594	459.6
18.8846	1996.1	141919	7.04412	287.4	6546.9	9.7126	493.4	15606.8	1.53362	390.447	73152.4	5.46032	247.2	10033.9	1.7999	223.267	38630.6	1.32066	231.6	16967.2	3.29554	310.8	117715	8.05625	257.8	4948.6	2.05912	482.1	275673	4.96345	190.1	5072.1	9.74551	1792.2	223663	2.42879	475.8	69415.6	2.093	182.3	10968.4	1.93017	215.6	13891.5	1.5106	342	57376	2.2617	947.2
12.8778	927.2	38391.3	9	243	2124	8.03169	228.1	4400.5	2.02	308.141	35033.1	1.71191	150.1	26134.9	2.35449	183.294	14107.1	3.9931	703.4	9793.3	1.49711	276.9	47085.9	4.76147	155.7	2183.2	5.03935	152	74370.8	8.53383	227	4032.5	1.47897	1659.7	1317366	1.50284	607.9	187906	4.43519	1512.4	381277	1.56863	280	35459	2.51743	361	30339.5	8.05625	257.8
10.1303	241.1	3780.1	4.78352	296.1	13326.4	4.63707	240.2	8958.7	2.34501	461.588	63314.4	2.9841	336.1	4255.9	2.99971	293.534	7389.37	2.61196	585.9	141154	2.27714	151.7	23666.5	7.07045	361.3	13244.9	2.65943	857.1	1287551	2.72608	2060.1	853792	4.47581	150	1967.6	3.81174	344.2	23031.6	9.28462	241.4	4447.8	4.28435	358.6	16235.1	2.27714	276.9	23666.5	4.76147	155.7
15.4225	1054.9	53153	1.39161	298.5	49023.2	9.32632	265.8	4993.3	2.23598	256.981	22289	2.87511	161.5	25528.9	3.82744	161.669	14318.7	2.62148	209.1	97276.3	1.20973	216.6	14079.5	2.90756	619.6	98442.1	2.1103	206.7	56231.2	3.31781	1396.8	78934.3	7.06796	218.4	4970.9	2.75142	193.7	10474.2	8.5045	377.6	11513.9	2.30812	150	4311.1	1.20973	151.7	14079.5	7.07045	361.3
17.205	621.1	15413.6	5.73176	730.8	32290	2.43894	150	6687.5	1.37214	1017.37	530217	4.37669	250.8	2024.1	1.88181	222.774	8887.75	1.79177	2636.2	13192.3	1.35885	868.4	21127.1	2.57994	558.3	91844	5.93252	345.3	520674	8.57672	162.1	2204.2	1.0134	219.3	35489.2	1.26632	192.1	22023.5	9.26087	149.1	1518.1	1.85817	1912.8	1.3532e+06	1.35885	216.6	21127.1	2.90756	619.6
12.2898	432.6	10848.8	3.03734	553.1	76383.1	1.97466	152	3556.7	1.38716	211.375	23574.5	5.84615	365.2	6452.2	1.93184	214.836	15422.8	3.08039	150	1300754	1.60221	258.6	288739	3.34833	944.9	185307	4.82239	149.2	64789.1	13.119	275.5	4074.5	1.22276	200.9	25597.3	3.88535	150	2779.9	4.88043	269.4	10337.5	1.78772	150	7838.9	1.60221	868.4	288739	2.57994	558.3
26.3163	1081.6	24598.4	2.71641	347.7	30310.6	11.3812	2505	262886	1.66654	171.966	13109.5	1.34117	204.9	71781.5	1.97331	1973.98	12589	2.93409	251.8	4066.7	3.78624	500.1	12123.7	3.93612	178.7	6140.7	3.21579	209	98865.3	3.92738	1243.8	225544	6.09512	986.8	120003	4.03575	767.6	106562	2.90521	183.9	8740.5	1.4933	1236.6	765399	3.78624	258.6	12123.7	3.34833	944.9
15.5233	150	629.6	2.94477	346.6	27900.1	1.84475	151	4337.4	3.00795	159.306	5546.63	2.62356	202.3	9784.1	3.42759	1584.29	662139	1.82729	314.5	18089.6	1.46143	202.2	101419	3.65189	1210.6	306730	2.98083	155	39546.7	7.51995	659.5	43267.6	2.45146	939.4	259735	3.2677	378.4	32840.8	3.65868	183.3	6696.7	2.18669	322.1	33922.5	1.46143	500.1	101419	3.93612	178.7
13.9508	1361.6	86188.3	1.69209	896.3	147818	6.12033	150	2468.4	4.46534	1375.03	248658	2.58036	245.8	10118	1.90729	177.407	903090	2.09947	375.3	36095.1	1.53066	154	17775.5	1.16065	199.4	26011.3	3.89956	337.5	316914	4.58133	343.6	18200	2.66184	441.6	52532.6	2.58537	148.4	6495.6	11.7731	1780.1	202181	3.00556	2326.3	1.22405e+06	1.53066	202.2	17775.5	3.65189	1210.6
8.04178	288.7	6376	2.33794	626.1	32354.5	5.03892	1307.6	70623.6	1.77915	396.107	61395.4	4.11725	325.7	7988.7	2.13759	351.568	10383.5	1.67919	1784.4	63653.5	1.86119	890.6	5512.5	2.09687	668.9	155274	3.09949	215.1	68077.6	10.5375	603.8	23236.7	2.02293	202.9	14661.8	4.37209	169.2	4633.1	3.065	306.5	22854.2	3.79956	174.4	5411.2	1.43831	890.6	262179	1.16065	199.4
16.2272	2185.8	145736	4.92241	850.1	85245.9	5.46909	150.4	2932.4	4.07216	1003.05	181422	3.49464	201.3	14055.8	4.08353	155.841	20103.2	2.315	333.8	828042	1.43831	254.4	262179	6.55631	483.2	23730.9	3.13911	175.4	48690.7	5.07627	150	1832.2	1.67166	568.7	137647	1.93954	362.5	50204.9	2.16859	207.1	14426.5	1.5808	327.7	51596.8	1.07071	254.4	42074.2	2.09687	668.9
8.07333	150	1231.6	3.12863	248.1	13424.9	4.11435	183.5	4986.7	2.41196	191.958	9579.1	2.31114	1005.8	6892.5	1.75239	443.62	7130.44	1.67907	173.9	50981.7	1.07071	303.4	42074.2	3.01166	723.4	71242.6	2.84287	199.2	84375.8	5.99136	762.7	61392.8	3.59438	691.2	98339.6	4.80297	159	2281.7	6.75269	251.2	6583.7	1.23314	1071.6	668546	4.46834	303.4	14874.7	6.55631	483.2
5.05627	314.5	13260.6	3.2471	195.8	5386.3	6.19386	1169.4	162068	2.38138	364.13	40644.2	1.62304	183.5	411355	1.84998	171.194	77290	2.93255	246.4	7560.2	4.46834	151.9	14874.7	2.29195	409.8	48115	1.20965	1107.1	906466	5.34068	920.2	58126.6	4.35152	150	3488.3	2.99928	414.8	43284.7	7.02388	500.1	23103.9	1.15874	949.7	595087	2.69805	151.9	5256.2	3.01166	723.4
3.6955	150	2171.3	3.73138	470.9	26385.9	2.91535	478.7	37004.7	1.81491	152.219	8789.17	1.44148	326.3	16183.8	1.16555	403.371	18535.2	2.35789	220.3	17418	2.69805	150.1	5256.2	2.97914	242.8	10708.1	4.02794	168.2	56852.9	3.39884	176.4	6157.8	1.70713	1106.9	519983	2.83885	1604.8	623892	3.27096	167.8	5763.5	4.4557	211.2	5390.2	1.79331	150.1	9040.2	2.29195	409.8
10.3461	1025.3	57648.1	3.68507	360.4	25515.8	6.06126	395.8	13911.3	2.92092	282.201	9894.55	2.47384	155.9	22540.1	2.41685	163.194	47258.1	1.48751	321.5	21901.3	1.79331	207.1	9040.2	5.494	229.1	3522.5	1.70934	173.4	37485.7	2.96296	232	9409.6	7.79899	155.2	1756	5.78238	223.2	4315.1	10.9045	536.5	17882	3.06849	154	4238.8	1.43025	207.1	20180.8	2.97914	242.8
14.1613	1967	140828	3.29886	551.9	16328.4	6.47552	370.4	14878.6	1.98331	1632.49	991193	5.21405	281.6	1919	1.94725	391.06	9234.74	2.28989	397.5	33425.7	1.43025	202.7	20180.8	6.44726	1601.5	289003	1.18517	273.8	63394.5	6.91339	175.6	3376.6	2.63702	290.6	23376	8.80208	422.5	14385.7	2.12694	150.8	7670.6	2.52716	1516.8	672103	1.90866	202.7	12514.1	6.44726	1601.5
5.25854	150	1261.8	8.24248	438.5	14049.3	1.03462	158.4	7285.5	5.50291	569.748	40554.8	4.27314	360.9	10910.6	2.34051	342.422	47957.3	1.7141	540.6	69025.3	1.90866	209.2	12514.1	4.60566	211.4	6452.2	1.47894	579.4	241621	4.53608	264	10005	4.69612	217.9	6670.4	3.30398	1410.8	423150	3.28889	150	4125.8	1.38647	350.5	66988	2.4994	209.2	10650.3	4.60566	211.4
10.1296	609.8	25807.6	7.04452	205.7	4116.6	2.55731	1474.8	92664.2	4.5869	341.312	15965.6	2.31792	383.4	37124.3	3.27101	197.919	22696.5	1.87708	483.3	86385.4	2.4994	362.4	10650.3	6.15515	472.1	22697.8	3.10467	758.6	1327176	3.21046	2253.1	1143086	1.84889	1818.2	1344588	2.93599	169.7	7548.4	12.4065	152.6	1215.8	1.6804	150.9	9559.4	1.49382	362.4	55233.6	6.15515	472.1
9.51685	1835.8	170090	2.0926	619.2	132773	4.48788	148.1	2971.8	2.05876	826.365	247105	1.40285	164.1	67074.8	2.72856	613.715	9990.5	1.08193	487.6	162378	1.49382	184.4	55233.6	2.02515	378.5	19983.6	3.34098	357.5	316237	2.4805	150	5604.5	1.74767	150.3	9844.6	1.63439	835.5	301019	3.25413	197.2	8949.5	1.76203	197.7	9505.5	1.63739	261	31799.8	2.02515	378.5
6.42159	249.8	5998.8	2.52825	295.3	18930.8	5.91584	899.8	94429.4	2.08849	321.65	36874.6	1.78176	510.9	8070.2	1.39622	165.143	179255	4.36918	686.2	36296.2	1.76122	239.2	14498.8	9.18235	790.6	47919.2	3.82589	584.7	707390	2.21044	283.6	26615.9	4.44776	178.8	4942	2.17725	1182.9	246533	2.77577	153.5	5696.5	3.50325	593.1	55917.1	1.76122	184.4	14498.8	9.18235	790.6
2.85812	167.2	7159.4	5.11783	999	84455.9	3.92745	200.3	7557.6	2.68105	380.581	40624.4	5.35535	181.2	34460.1	1.84286	356.354	10568.8	1.51848	230.3	228036	1.85714	178.9	21070.6	2.46246	206.6	11049.9	3.53755	161.1	65483.1	3.13725	144	4768.5	1.67883	552	128988	2.62727	1144.7	375628	6.24306	539.4	32429.4	1.83659	301.2	36200.3	1.85714	239.2	21070.6	2.46246	206.6
2.62741	151	4395.2	3.62882	249.3	11770.2	11.8324	211.8	2580.1	1.76863	917.001	291015	4.61069	194.7	4790.9	1.84179	415.909	45232.6	5.4316	863.7	4873.7	1.67824	325.9	12489.1	8.09645	159.5	2231.8	2.38118	208.3	75534	3.76119	201.6	7116	3.68699	683.2	93414.7	3.58589	1870.4	194617	4.43984	332.1	17549.4	3.29916	588.9	40908.3	2.62662	161.8	5166.8	8.09645	159.5
2.32143	150	6089.5	4.54658	624.7	62776.8	3.58352	1257.1	126433	2.71866	184.832	7144.9	3.60556	237.3	4492.5	1.96746	291.191	39086.6	1.59737	1968.1	353756	1.39691	490.9	39726.7	6.03439	228.1	6437.8	4.05752	405.1	477524	2.1161	156	6540.3	1.22836	153	10462.4	29.4531	1443.2	40235.4	1.76511	178.1	12842.7	1.64125	151	5187.8	1.67824	178.9	12489.1	6.03439	228.1
9.06333	271.9	6009.3	1.81778	1766.7	370580	2.46209	204.6	10037.8	4.24743	967.581	147594	2.44892	160.9	15734.3	2.78729	185.521	18862.5	2.15187	729.7	1249926	3.10893	156	59009.8	4.89809	230.7	7944	4.36442	589.7	1082846	2.58925	1440.4	96821.5	5.21667	155	2235.7	1.78456	1178.7	573941	12.1489	628.1	20583	2.4084	150	5090.5	1.39691	325.9	39726.7	4.89809	230.7
16.7231	839.5	26729	8.43191	396.3	11507.3	4.55168	1149.3	99071.7	2.3477	369.96	41952	3.36611	163.7	4531.9	1.54219	1197.6	16237.7	1.4901	1239.1	245570	4.44625	552.7	2720.7	2.82363	164.9	4836.9	1.86815	150	30402.6	2.95443	2820	630255	4.1141	320.9	17619.1	1.88359	682.8	185599	2.15677	425.1	52873	2.26074	152.6	7653.6	3.10893	490.9	59009.8	8.48276	270.6
4.9891	686.5	34319.4	10.5025	844.4	16948.8	4.42232	1585.4	138717	2.16216	404.719	54939.2	3.9351	154.8	4842.1	2.18164	170.926	365502	1.6704	1295.9	597867	2.00181	222.7	109241	8.48276	270.6	3870.8	2.02063	208.4	47373.7	3.44737	235.8	9592.2	2.61963	170.8	8599.9	3.36368	787.1	125414	4.28226	159.3	4483.3	1.6755	253	24020.1	2.00181	552.7	109241	5.67109	213.8
5.07589	153	1807.3	9.18935	155.3	1861.1	6.26568	339.6	12173.7	2.19419	180.522	10947.4	2.30357	279.1	7476.1	1.49376	182.847	14631.5	1.96587	217.3	439132	1.43308	248.1	24116	5.67109	213.8	5703	1.2959	382.9	97624.6	6.35207	429.4	16940.9	3.00652	1106.7	287106	2.82637	263.7	16225.9	1.55793	174.8	7135.7	2.04087	149.8	6160.4	1.25806	429	110212	1.49672	154
8.61204	614.9	30796.9	8.59964	483.3	19155.6	3.35106	460.1	35832.3	1.07714	190.454	23232.7	1.76088	274.8	30906	2.75555	392.279	8220.05	2.65648	150	12110.6	2.01543	265.9	22038	1.49672	150	9300.5	4.29245	180.2	73310.1	2.44365	687.4	24180.4	2.45205	554.9	97794.1	1.37155	725	203952	4.7657	311.2	13760.1	1.50489	153.8	11874	1.43308	222.7	24116	1.17896	513.2
5.09558	357.2	17268.1	3.89152	279.8	14824.7	2.54333	261.2	10793.6	3.1357	233.603	12892.6	1.98555	307.9	27472.9	2.14893	402.86	52561.5	4.43165	241.5	1477.3	3.08111	591.9	13664.2	1.17896	513.2	162531	4.22678	150	56647.9	5.28693	150	13392.1	3.57869	288.8	16076	2.53903	240.7	16770	3.50694	202	8436.9	3.29325	1566.6	569572	2.01543	248.1	22038	6.08304	175.8
16.9959	832.8	25827.3	7.38725	150.7	1926.9	8.78481	152	1531.2	2.86615	273.59	18382.7	2.45143	931.5	27072	2.58415	329.13	37956.3	1.26905	209.5	33682	2.80388	269.7	66917	6.08304	175.8	3376.6	4.00802	411.7	425441	2.17774	272	25101.8	3.05719	187.1	7698.2	2.62491	366.7	38019.4	4.34472	1017.1	164392	2.18031	157.2	8026.8	3.08111	265.9	13664.2	7.20283	152.7
6.77255	172.7	3000.7	11.1329	846.1	13773.2	2.12315	150	5663.6	1.75114	264.755	27479.5	1.94874	275.7	225097	4.41834	156.32	14740.6	5.70845	863.3	5496.7	1.18758	173.8	26257.1	7.20283	152.7	2055.7	2.18601	205.9	68393.1	3.17309	518.8	58652.3	3.3253	800.4	145666	2.96978	150	2969.2	1.93804	178.3	12067.2	1.6559	205	11686	2.80388	591.9	66917	3.0651	169.5
2.48654	150	5120.8	1.50366	1582.6	349398	3.75132	212.7	8191.1	1.78256	165.502	11084.1	2.79331	596.1	20604	2.28464	216.71	7878.31	1.59457	209.4	354234	2.36141	321.7	9535.7	3.0651	169.5	2821.9	3.61386	352.2	338300	1.26255	857.4	449641	7.8107	189.8	3475.2	1.73832	223.2	18922.9	1.70171	150	6656	4.2648	2974.7	1.20866e+06	1.18758	269.7	26257.1	1.97049	233.7
8.3252	150	874.1	8.66825	182.9	2252.8	12.8451	472.7	8987.6	2.1406	153.509	8063.64	1.10738	221.7	154186	2.21947	413.433	12506.2	2.16322	212.2	14623.6	1.99318	245.9	37500.2	1.97049	233.7	10093	3.03782	235.3	74391.8	3.5042	375.3	27910.6	6.36814	2018.7	444811	7.27092	695.1	44257.4	8.20217	227.2	4584.5	2.56414	1513.1	659215	2.36141	173.8	9535.7	2.67528	455.6
6.79805	208.7	3538.3	2.07338	463.4	40088.2	4.62253	1452.4	107975	2.84258	303.017	15977.4	1.23855	565.7	29943.9	2.12923	157.124	57932	1.5444	302.1	18986	1.80676	177.3	21471.5	2.67528	455.6	58564.2	3.53374	148.2	53339.6	2.49419	158	4428.1	3.72807	297.5	17658.5	4.43844	1092.3	196445	2.14439	150	6634.9	1.84705	237.9	22530.9	1.99318	321.7	37500.2	2.4071	345.9
5.26667	150	1378.8	4.73737	234.5	3260.9	7.68571	699.4	44144.3	1.82567	322.206	39228.6	3.34932	145.7	68607.3	1.42526	1034.07	10221.8	2.21481	380.8	30363.2	1.37548	381.5	16070.8	2.4071	345.9	37359.6	2.24976	209.8	61129.9	4.86411	1066.7	33750.3	3.55528	150	2450	2.81666	1258.2	413520	3.49071	281.7	16919.8				1.80676	245.9	21471.5	2.33685	443.3
12.1708	833.7	41439.4	6.69485	324.7	8283.1	1.51964	468.2	56687.3	1.8346	169.831	10522.8	4.74593	217.5	3036.2	1.51981	706.433	522885	1.66361	532.3	66045.6	1.36153	360.3	52717.9	2.33685	443.3	58139.7	4.90788	187.8	55727.8	3.13136	190.7	8933.8	6.24688	199.9	3078.2	1.40409	150	9207.1	2.25345	179.6	10370.4				1.37548	177.3	16070.8	9.58599	150.5
6.43794	274.9	5963.3	4.87509	675.2	47414.5	3.92527	619.8	38923.7	1.37223	538.697	120316	1.50623	299.3	20920.8	1.75094	330.805	213414	1.87232	486.2	84232.5	1.63105	234.9	58452.5	9.58599	150.5	742.6	2.83691	191.3	73913.4	2.19933	726	130590	2.72946	156	4571.4	1.40419	388.4	80645.6	5.89817	289.6	10508.4				1.36153	381.5	52717.9	3.09226	271.5
5.33967	224.8	6356.3	3.18937	330.1	21545.1	6.94115	1368.1	177057	2.87355	340.761	29848	1.22966	455.3	24959.8	1.87582	396.71	40674.4	1.33535	495.1	128588	1.05195	171.7	39206.2	3.09226	271.5	15378.1	6.73999	152.3	97342	3.07487	575	52332.8	3.01591	152	4223.1	1.58468	275.1	35244.7	5.992	149.8	2352.7				1.63105	360.3	58452.5	2.99493	590.3
2.85011	153	3721	6.26333	187.9	1414.3	2.4626	161.3	6596.8	2.32757	1720.52	588771	2.78812	426.1	37129.5	1.44875	208.48	73570.4	4.59703	680.5	36559.1	3.19739	415.4	6850.5	2.99493	590.3	86620.7	1.22464	330.3	27296.8	2.72833	1381.9	277285	1.87282	537.5	113354	3.05015	200.7	9429.3	1.67396	214.1	19798.3				1.05195	234.9	39206.2	2.06724	433.5
18.9002	1799.3	77353.1	6.19526	339.5	13137.1	6.06691	163.2	2768.1	2.76869	439.505	51896.5	4.00847	697.5	31770.9	3.30427	235.948	5455.94	1.51458	220.9	224239	2.7365	177.1	35944	2.06724	433.5	68941.2	2.57994	174.5	54547.5	2.38591	918.1	73365.3	5.53955	546.2	29424.7	5.66382	1192.8	153727	1.0972	176.1	20823.5				3.19739	171.7	6850.5	3.01077	587.1
7.38202	197.1	3832.7	2.61426	410.7	39942.3	12.1786	375.1	8139.9	2.24294	390.239	39805.6	2.8751	909.3	104700	4.74357	231.387	8652.48	3.03434	190.9	9621.2	1.77455	157	12828.2	3.01077	587.1	86256.6	4.40579	383.7	422882	5.34303	348.9	16306	4.36159	252.1	11045.9	3.1471	233.2	13088.5	4.58087	464.5	24452.5				2.7365	415.4	35944	1.82343	1144.2
3.87908	150	2450	3.10545	359.3	4079.8	5.75	239.2	6850.5	2.30751	320.818	30820.6	2.09179	1286.4	190067	3.29555	183.788	9560.7	1.07549	299.6	23629.7	2.45714	202.1	5314	1.82343	1144.2	498513	2.16763	190.9	23408.9	3.99225	206	7858.6	5.11946	381.4	18932.1	3.07723	613.6	91715.2	1.66283	158.8	10027.3				1.28673	162.9	11361.4	1.97882	794.3
12.3719	1433.9	104221	4.9012	163.7	3467.3	1.34036	248.1	18403.8	2.87649	194.285	9205.82	2.3582	592	520753	2.17862	256.678	6274.79	2.61431	204.3	24937.5	2.77992	336.2	6181.5	1.97882	794.3	240437	2.18393	197.9	63575.9	1.29911	275.8	18921.6	2.83925	151.9	4694.9	3.34159	310.1	21990.7	2.90167	174.1	7603.6				1.77455	177.1	12828.2	6.21964	240.7
1.94042	150	4145.5	4.01815	221.4	8819.4	9.72578	1365.5	95922.5	3.04535	321.153	25406.7	7.86189	882.7	29934.7	2.6112	178.405	17353.6	2.28779	298.1	9945.8	1.09476	153	71137.5	6.21964	240.7	4345.3	1.72896	153	17863.6	2.81313	925.8	126436	3.34713	210.2	7455.1	2.3532	375.1	45423.2	1.70205	290.2	23441.7				2.77992	202.1	6181.5	11.0233	283.3
12.3875	716	14607.9	5.89937	281.4	6997.7	7.4752	3783.2	503413	2.17071	161.841	9117.76	1.42394	154.7	418104	4.43335	240.257	4952.53	2.07158	372.6	32897.3	2.19614	155	6220.9	11.0233	283.3	4655.5	3.66986	344.4	329142	6.60507	182.3	3228.1	4.57679	816.5	108030	3.16631	146.6	4781.7	5.18169	373.6	18990				1.09476	336.2	71137.5	4.23187	560.3
4.7248	173.4	2244.9	3.09667	371.6	27959.2	1.60073	151	7045	1.43349	535.989	118844	3.54005	778.6	4723.8	3.35639	728.243	12018.6	6.50262	2347.6	15476.7	2.09133	247.4	6337.9	4.23187	560.3	55291.5	1.21658	177.3	14533	1.47829	885.2	221994	3.59434	342.9	23976.7	2.12098	422.5	64664.2	4.23982	281.1	12135.5				1.11341	247.4	40663.9	1.32252	289.5
5.08275	509.8	35737.6	3.14149	395.2	21213.9	4.16694	257.1	10900	2.89739	347.74	30896.8	3.32593	1792.1	120073	2.36727	470.914	169631	3.13557	312.2	1051742	1.11341	1098.7	40663.9	1.32252	289.5	35875.6	1.86915	147.5	27868.5	3.80576	158.7	2644.5	6.64178	702.7	30622.1	3.29508	301.5	18508.9	2.69626	151	3527.8				2.34916	1098.7	273507	2.16873	140.1
12.435	717.5	29029.1	3.42466	900	121040	8.04451	271.1	5749	1.82268	428.337	63123.8	1.68732	201.1	1472614	2.24037	165.211	66931.5	1.63971	186.8	45934.5	2.34916	351.5	273507	1.35054	162.2	14751.1	2.17003	150	29439.2	1.99369	948.6	299134	2.59551	184.8	9725	2.25762	429.4	61555.7	4.51067	317.1	14343.7				2.68731	351.5	32300.6	1.35054	162.2
4.71915	160	1867.7	5.93136	380.2	10486	1.9573	467.6	29732.3	3.13981	1589.63	571757	2.47052	156	12578.5	3.10095	685.493	6172.27	3.0623	161.3	8088.6	2.68731	164.8	32300.6	2.41939	489.2	39534.8	2.04653	859.7	1096333	1.98248	155	2386.9	5.7386	188.8	2969.2	4.2557	447.7	28378.5	6.23232	153	1109.3				2.37807	164.8	8647.2	2.41939	489.2
7.34956	166.1	1968.9	7.13652	418.2	17988.4	2.5949	203.7	10773.9	2.07696	385.916	53975.8	2.15276	341.5	6157.8	2.67976	903.555	125798	3.49134	522.4	5116.8	2.37807	419.8	8647.2	3.64924	167.5	5336.3	1.24048	273.2	62362.8	2.68188	193.9	7698.2	2.6268	150	4198.1	8.51583	457.3	16148.3	7.7931	203.4	3413.4				1.29768	419.8	103822	3.63961	600.9
3.80423	1366.1	133603	6.12941	156.3	2733.9	4.95932	292.6	12180.2	2.05234	437.582	62918.7	6.26606	337.8	13461.7	3.32731	1108.72	160370	3.22072	579.6	60587	1.29768	322.9	103822	3.63961	600.9	71425.3	3.53596	190.5	64438.1	5.94767	409.2	19898.2	11.4779	2202.6	198022	2.13325	171.3	10637.2	5.94057	229.9	6663.8				1.59693	322.9	48650	2.30566	1030.4
5.44377	2502.5	209389	5.51651	885.4	22703.1	10.5076	151	1248.6	1.83605	447.485	79683.5	2.68735	321.4	28348.3	1.83322	154.929	369265	2.64295	1863.5	94428	1.59693	246.5	48650	2.30566	1030.4	287804	4.38766	149.1	33127.3	8.17868	260.9	6080.3	5.76607	224.3	6368.1	2.53529	276.6	20977.3	5.52381	232	5388.9				1.10687	246.5	19970.5	2.73706	151
3.34865	151	3023	5.92224	327.5	6619.2	18.8738	613.4	11262.8	1.65808	335.298	31881.3	1.65756	967	46246	1.76161	179.978	9927.41	2.5162	432.8	977843	1.10687	752.6	19970.5	9.83333	265.5	4702.8	1.74318	241.8	71452.9	4.99689	160.9	2883.7	4.60903	541.1	43133.6	3.12964	1028.4	224148	2.49351	157	839.9				1.67022	752.6	178728	9.83333	265.5
3.81408	346.7	22951.5	5.15921	473.1	32639.7	4.56802	1396.9	149399	1.41177	249.842	30618.2	2.29147	184.8	201488	1.89253	458.981	12661.3	1.92185	259.8	71502.9	1.67022	160.5	178728	4.96465	491.5	18916.4	1.31032	1302.2	1116706	2.49771	381.4	37186.1	6.95683	386.8	14451.5	3.05872	541.7	73466.5	4.3163	177.4	5413.9				1.92909	160.5	10275.7	4.96465	491.5
3.862	193.1	6239.3	4.98082	389.5	15144.1	1.45695	1301.2	213386	2.40548	300.11	25276.6	2.38452	603.6	10375.6	1.77115	253.805	73542.8	1.06171	2033.8	47566.9	1.92909	363.7	10275.7	1.29847	433.3	110165	1.32834	627.4	383505	19.5231	507.6	9102				3.12239	642.9	99292.5	1.05433	150	7268.4				1.63903	363.7	55905.3	3.19245	253.8
3.85251	150	1928.2	7.49564	601.9	36498.6	9.46067	168.4	2091.2	6.20706	282.132	9391.15	2.54899	450.6	88852.5	3.82671	412.859	10973.6	1.81007	150	1433761	1.63903	347.6	55905.3	3.19245	253.8	8613	1.2883	150	14827.4	1.16056	1267.8	1000593				4.84211	460	31366	3.58116	247.1	12874.2				2.37108	347.6	34131.5	1.47606	986.3
2.13686	157.7	3677.6	5.5182	454.7	23533.7	10.0226	577.3	21875	1.76146	158.475	11013.1	2.06602	236.1	41545.8	1.84447	340.111	68725.6	2.34701	2151.7	4959.1	2.37108	270.9	34131.5	1.47606	986.3	402187	2.54727	215.8	76168.9	3.56131	150	3462				2.04889	184.4	11692.6	7.86687	254.1	5650.5				1.38285	270.9	40805.8	6.38865	450.4
7.1904	868.6	44437.4	3.30228	173.7	6972.7	2.57811	2475.5	369659	2.07767	925.523	264351	3.7776	148.6	8626.2	2.22744	1630.54	35478.7	4.1919	324.1	848181	1.38285	437.9	40805.8	1.98141	153	917.4	6.52346	232.3	202964	6.57117	364.7	10568.8				1.56656	335.4	52080.5	7.74627	2127.9	342786				1.5189	437.9	66801.4	3.88755	193.6
8.74783	150	814.9	2.87374	769.3	153710	2.41276	150	4712	3.94721	1961.11	604694	2.97796	189.9	5049.8	2.95666	207.081	479919	1.22719	1712.1	64697.1	1.5189	285.1	66801.4	6.38865	450.4	20096.7				8.18819	221.9	4367.6				2.41375	730.4	157056	5.87365	162.7	3251.7				1.39337	164	13965.1	7.20918	151
6.39105	1214.3	88913	4.42071	150	2469.7	7.01026	273.4	6867.6	5.30421	351.596	14681.5	1.24688	215.5	17741.3	1.99822	264.51	15664.6	1.58001	264.9	1167221	3.65982	175.3	13831.1	3.88755	193.6	7000.3				1.73832	158	153.8				1.28687	271.4	43517.4	1.75676	188.5	15057.4				3.65982	285.1	13831.1	2.29247	925.7
4.37465	155.3	4012.8	1.81726	153	7004.3	4.86471	596.9	36004.4	2.88817	667.378	101177	2.9889	351.3	9948.4	3.0146	253.283	17644.1	3.03436	271.4	14869.4	2.43135	411.3	7849.4	7.20918	150	1933.4				3.75482	214.4	9136.2				1.94376	1019.5	372171	4.43026	374.8	13962.5				2.43135	175.3	7849.4	6.60922	329.8
10.9781	1950.8	216729	4.13059	1072.3	131626	2.5813	242.9	6545.5	3.27989	657.034	93552.7	6.31835	190.4	14455.4	2.32787	1155.26	19106.9	3.89943	251.8	11759.6	1.37605	407.4	91528.6	2.29247	925.7	280718				1.49267	906.5	43848.6				3.78125	157.3	4547.7	2.24061	262.6	14640.7				1.37605	411.3	91528.6	2.09146	1003.9
4.14779	216.1	8459.3	4.71465	186.7	5128.7	2.99159	248.9	15133.6	2.40594	289.382	25489.5	2.15385	1321.2	9316.2	2.40929	244.506	323822	4.54513	1048.8	9665.9	1.29087	344.3	98167.4	6.60922	329.8	11227.3				3.95093	169.1	5320.6				4.18005	536.3	40803.2	2.68229	1407.4	466594				1.29087	407.4	98167.4	4.95902	302.5
3.45623	596.2	62151.1	2.20972	245.5	20601.4	1.9284	158.9	9176.9	1.58083	354.15	55608.2	3.33132	335.8	309758	5.04252	739.599	7925.63	1.824	259.2	460268	1.62636	367.6	50457.2	3.73295	197.1	5766.1				2.66865	447.8	9901.1				3.94057	192.3	6173.6	9.1039	1121.6	86464.3				1.62636	344.3	50457.2	4.08825	963.6
10.5134	784.3	37384.5	4.35219	169.3	4149.5	6.69714	1707.1	174182	2.03242	306.773	34592.8	3.98812	355.3	13698.3	1.9681	248.987	178055	1.25036	1154.1	38654.2	2.93845	336	34180.1	2.09146	1003.9	301069				8.79197	240.9	3454.2				2.01982	764.3	218052	5.33457	287	10206.1				2.93845	367.6	34180.1	3.73669	266.8
16.3367	1926.1	153911	5.6944	355.9	12114.5	5.46205	165.5	1763.9	2.89063	546.642	69938.8	6.1899	614.9	13641.8	1.54281	1079.66	26374.1	1.16037	199.1	765548	1.74184	300.4	43956.4	1.64512	425.1	79876.7				12.0186	193.5	1792.8				2.08882	190.5	11517.8	3.94662	635.8	76735.4				1.74184	336	43956.4	2.07593	151
9.15486	1111.4	80457.6	13.0068	572.3	14488.3	6.47314	2085	254566	2.2611	255.967	21840.8	5.03191	894.4	41491.9	1.87675	264.904	419746	1.55304	194.3	18184.3	1.90006	353.2	30942.8	3.75299	188.4	6460.1				2.81111	430.1	48953.6				5.50518	478.4	27472.9	1.9437	150	3462				1.90006	300.4	30942.8	6.66351	984.2
3.18548	1298.4	151634	4.98982	637.2	58723.3	7.17771	238.3	5186.5	1.67793	169.836	12709.9	4.04157	157.3	124753	2.94544	282.02	17329.9	3.00774	200.5	6684.9	1.7154	156.6	48660.5	4.38149	194.1	5875.2				5.59368	531.4	37242.6				6.0872	328.1	12962.3	4.83781	486.2	31314.8				2.17305	175.8	10651.6	1.84558	640.6
3.64047	991.3	48214.9	6.53869	430.9	6608.6	8.21032	2705.3	298072				2.65709	147.6	3466	2.08053	620.715	27086.5	1.8791	2152.3	15872.3	2.56721	183.7	5968.5	4.95902	302.5	12837.4				3.3187	173.9	4847.4				2.0119	150	6043.5	3.18324	1587.8	576996				1.7154	353.2	48660.5	3.28423	189.5
7.89189	175.2	2626.1	4.67434	152	3016.5	6.63996	687.9	36477.6				3.16738	284.2	3907.6	1.93679	345.515	112608	4.19306	323.1	848145	2.38571	265.6	10670	4.08825	963.6	87987.7				3.23399	393.9	30200.2				2.47252	368.9	39057.7	9.65859	916.6	62461.3				2.56721	156.6	5968.5	2.28215	182.8
8.51544	441.1	16168	5.17073	150	2080.6	12.8676	456.8	10149.5				1.57017	524.7	20243.9	2.13247	346.147	35979.5	1.21695	1756.3	64640.6	1.13894	150	45331.2	3.73669	266.8	13049										4.61947	1086.5	177708	3.58485	255.6	12286.7				2.38571	183.7	10670	2.36004	256.3
6.57265	153.8	2330.4	4.64369	754.6	81791.7	3.9119	328.6	18010.8				2.28627	1060.1	91624.5	2.61658	162.121	26527.9	1.52087	1878.5	1371435	1.78195	369.8	7920.4	6.66351	984.2	94543.7										3.40196	242.9	11441.6	4.50603	821.9	107141				1.13894	265.6	45331.2	2.6687	218.3
5.17597	150	1667.9	1.99637	164.9	6226.2	2.16667	193.7	6615.2				1.89439	665.7	409348	2.76853	648.338	5921.22	2.70911	148.3	865261	1.35657	169.3	72539.9	2.25458	701.4	146181										1.80164	461.4	90484.9	3.01741	1438.4	508749				1.35657	369.8	72539.9	1.43293	282
9.48421	2462.1	209979	6.37118	150	2125.3	1.53241	153	500.8				1.62445	254.2	153698	3.50919	238.151	87983.7	1.42459	517.2	11233.9	3.03405	327.9	7218.5	1.84558	640.6	155956										1.35714	435.1	104246	3.6893	150	2626.1				3.03405	169.3	7218.5	1.90552	151
1.88565	2425.7	655886	4.56122	759.9	60642.3	3.2418	158.2	3376.6				2.88536	542.3	13913.9	1.93811	1050.42	19773.3	2.09903	268.3	95599.1	1.21086	272.7	66349.2	3.28423	189.5	7948										2.0388	504.4	66575.3	3.5902	1385.1	406776				1.21086	327.9	66349.2	1.54776	1076
6.87273	226.8	3761.7	13.2947	252.6	2769.4	9.97368	227.4	2848.2				1.65942	305.5	120134	3.95698	552.974	205307	1.34419	302.1	36751	1.36486	665.8	40942.5	2.28215	182.8	4298										4.4175	792.5	102302	6.73065	1521.8	220975				1.36486	272.7	40942.5	2.84659	300.6
7.88387	150	1364.3	27.9152	625.3	8095.2	4.20703	215.4	7883.6				3.21579	579.8	19302.8	2.09752	280.922	87038.7	1.53897	810.5	45301	1.39376	515.4	193154	2.36004	256.3	15429.4										1.7793	194.3	13191	9.52857	150	1366.9				1.39376	665.8	193154	1.68568	156.6
7.45635	375.8	13134.5	11.1308	646.7	14734.1	2.47492	157.9	7294.7				1.88737	515.7	118792	3.10905	200.266	10977.6	2.01868	1322.1	244708	1.21959	385	93564.5	2.6687	218.3	7599.7										1.63309	152	241.8	5.74038	179.1	4060.1				1.21959	515.4	93564.5	1.45575	1098.8
9.10037	244.8	4470.2	6.617	1634.4	34274.7	3.2526	249.8	10558.3				2.30018	736.8	87960	2.58079	416.192	4899.96	1.11494	340.7	1112320	2.06103	792.1	34243.2	1.43293	282	41690.4										1.34273	419.2	97682.4	5.11954	222.7	6964.8				2.06103	385	34243.2	2.72133	645.5
7.49795	2561.3	106995	6.65576	427.3	12891.3	4.78935	1016.3	90775.4				2.53894	186.6	138837	2.05641	287.786	48667.1	2.65964	411.3	30472.3	1.52679	788.3	285969	1.90552	150	4567.4										3.42085	265.8	13422.3	7.33808	206.2	4085.1				1.52679	792.1	285969	17.9167	580.5
2.18534	2186	1166734	6.08357	211.1	5402	4.57671	1622.9	145933				2.19529	290.6	11966	4.63953	236.574	12928.1	2.04322	390.5	33816	1.29569	535.6	365449	1.54776	1076	440722										7.2607	373.2	12589	3.43316	534.2	35798.1				1.29569	788.3	365449	1.06123	256.5
5.71158	241.6	6704.6	12.0219	220	2977	15.0581	1554	102597				1.45884	251	43007.4	3.19927	437.109	11938.4	1.72482	261.2	62504.7	1.36181	148.5	142535	2.84659	300.6	18252.6										7.16274	1368.8	117968	2.67233	157.4	6820.2				2.88744	177	6751.9	2.33429	1545.3
3.40179	228.6	10905.3	3.27854	1481.9	184628	8.33962	972.4	49554.3				3.36011	869.8	11670.3	2.32262	297.872	57975.4	2.78168	221.7	16005	1.70886	159.4	9738.1	1.68568	156.6	10834.3										4.82647	773.2	91198.6	4.25467	182.1	5424.4				1.36181	535.6	142535	2.94842	914.6
2.66232	163.2	7031.9	10.0243	576.4	22605.8	4.95306	242.7	7490.6				1.42031	173.9	343535	1.79188	203.419	33215.4	1.51228	423.3	23699.3	1.12096	392.3	17199.8	1.45575	1098.8	428173										2.22267	382.3	49976.2	4.15613	210.3	6753.2				1.81688	572.5	110572	1.65824	846.2
6.85034	201.4	4299.3	6.27197	149.9	1871.7	2.2333	210.6	14271.4				1.79094	253.3	11064.3	1.50593	638.526	16471.6	1.38424	251.3	93157.1	5.20983	363.2	20303	2.06798	368.1	47881.1										2.90189	153.8	3205.7	3.16816	318.4	23529.8				7.36759	186.4	3310.9	2.35508	277.9
15.2627	511.3	10564.9	2.99171	252.5	15867							2.75626	251.8	15383.3	1.74541	196.286	170822	2.3055	761.9	17557.3	1.4867	338.4	51272.1	3.35238	944.7	184161										7.94475	150	1758.6	5.5	193.6	4455.7				1.12096	159.4	17199.8	1.76095	570.9
9.74977	1063.7	67337.6	11.0611	398.2	6638.9							1.23613	154	36615.6	1.97084	186.052	13296.1	5.72427	886.3	45273.4	3.52868	277.8	23604.7	2.72133	645.5	113907										1.98122	791.3	231289	4.37219	543.9	48987.8				5.20983	392.3	20303	1.72782	459.6
4.39444	237.3	9767.1	6.32508	204.3	5031.4							2.97602	150	2992.8	5.5894	805.817	3786.69	1.55737	1533.5	359293	1.51225	422.9	38400.5	17.9167	580.5	14008.5										3.92343	169.1	4447.8	1.99695	523.4	97063.4				1.4867	363.2	51272.1	3.48608	325.6
16.2744	984.6	31559.3	5.05863	155.3	3233.3							2.10145	282.4	4265.1	3.41915	160.523	126163	2.76257	292.8	625844	1.21279	668.8	92198.9	1.06123	256.5	44939.5										4.7083	1259	223275	2.43392	480.7	70502.6				3.52868	338.4	23604.7	2.28416	419.6
6.88352	797.8	64719.4	9.62857	168.5	2137.2							1.75295	525.1	30644.5	2.8662	258.548	5611.03	2.96356	196.4	18330.2	2.2967	448.5	112172	2.33429	1545.3	746406										2.33333	155	4362.4	6.05144	482.3	18469.5				1.51225	277.8	38400.5	1.34647	242.5
20.6378	786.3	18238.2	6.71088	1042.2	108318							2.75065	449.5	70553.9	5.77924	364.536	6575.78	5.7093	150	3548.8	2.81544	571.7	41251.4	2.94842	914.6	204650										5.07977	178.3	4725.1	1.45256	212.8	22938.3				1.21279	422.9	92198.9	2.11515	611.7
4.10403	150	2482.8	3.00226	153	3079.6							3.10643	171.7	36992.9	1.82322	160.698	46155.3	6.87562	222.7	1696.8	2.61289	428.8	61009	1.65824	846.2	282899										1.66876	532.5	63398.5	5.06646	480.3	29763.8				2.2967	668.8	112172	3.08401	227.6
4.43011	150	2363.2	3.71959	220.2	9364.9							3.42715	528.8	4667.3	3.97344	426.586	4843.44	4.18609	468.7	5845	2.11858	496.2	57369.5	2.35508	277.9	23757.2										1.46637	1035.7	382939	7.24621	429.7	14427.8				1.38647	207	21633.2	1.90279	606.8
3.54182	1968.9	135310	3.17355	153.6	5508.5							2.28325	1048.8	93141.3	2.79302	179.586	45268.1	1.29154	954.1	128765	2.08926	277.4	84607.1	4.74532	156	2248.9										2.89357	377.9	34987.1	4.25659	177.5	4457				2.81544	448.5	41251.4	6.18436	150
2.77917	153	3844.5	2.75913	241.7	13141							1.88735	714.6	405427	11.3521	299.732	1723.13	2.86689	289.5	203954	1.66807	380.6	31200.4	1.76095	570.9	137978										1.59084	302.1	43078.4	3.7804	208.3	8481.6				2.61289	571.7	61009	1.55144	150.8
3.48054	178.9	3723.6	7.44671	2557.2	198739							1.72027	257.7	184278				3.09626	293.4	20431.8	1.6134	197.5	66631.8	1.72782	459.6	91009.4										2.3758	369.2	42914.1	2.39987	369.1	42937.7				2.11858	428.8	57369.5	2.56687	587.3
3.82975	195.7	6695.4	7.37365	341.4	11826.7							3.19331	538.2	13060.9				4.9898	421.8	11997.5	1.41172	549.5	18289.4	3.48608	325.6	9514.7										2.05032	158.9	9165.1	5.4751	428.7	23378.6				2.08926	496.2	84607.1	2.21486	247.4
10.1226	1452.6	144256	7.09524	208.6	4091.6							1.63438	195.1	120161				1.16198	402.1	106987	1.67428	154	84327.1	2.28416	419.6	54914.2										1.19391	192.1	21747.5	3.58341	388.8	29506.2				1.66807	277.4	31200.4	1.89659	328.3
8.35099	150	1345.9	2.97836	399.1	11707.1							5.25876	167.1	4400.5				1.70743	1794.9	64472.3	2.30685	455.3	2214.7	1.34647	242.5	32420.2										5.36324	496.1	34925.4	1.61722	264.9	33116.8				1.49903	310	46824.3	3.42141	402.7
5.42945	265.5	7227.7	2.05755	572	29698.1							2.6315	316.4	4474.1							3.94541	467.2	29453.6	2.11515	611.7	107991										2.32203	438.4	63257.8	3.08319	526.3	66872.3				1.6134	380.6	66631.8	5.06204	158
48.5356	1839.5	40147.3	1.63795	188.2	5371.8							1.71027	180.8	25178							2.776	262.4	38246.8	3.08401	227.6	11383.7										4.85311	498.9	37953.7	18.4419	809.6	24979.5				1.41172	197.5	18289.4	2.81149	225.2
9.69966	568.4	20718.4	2.78969	200.3	5379.7							2.45319	165.9	7226.4							2.00765	511.8	25870.7	3.20243	316.4	23594.2										2.84629	157.4	6539	3.3661	198.6	8135.9				1.67428	549.5	84327.1	1.81501	379.7
10.3147	609.6	22612.4	4.97588	226.9	7562.9																1.41969	289.9	140526	1.90279	606.8	139931										3.88992	501.8	44658.2	7.94685	1046.6	77237.4				3.94541	455.3	29453.6	3.77778	150
7.54562	810.4	52104.1	7.78383	414.1	16537.4																			1.55144	150.8	10606.9										2.49614	155	4722.5	4.9274	719.4	77223				2.776	467.2	38246.8	3.45465	304.7
10.0304	494.5	17900.4	7.15727	482.4	17791.3																			2.56687	587.3	100878										1.45536	163	138	5.25885	237.7	7852				2.00765	262.4	25870.7	2.69989	251.9
8.31761	264.5	5210.1	21.2711	1161.4	28329.9																			2.21486	247.4	16334.9										1.34659	778.6	330951	1.40417	208.8	22849				1.15085	265.5	46627.2	6.80653	270.9
11.6948	180.1	1866.4	10.9789	155.9	1359.1																			1.89659	328.3	25108.3										4.25726	498.1	43220.3	3.59705	268.7	11297				1.94214	379.3	52615.4	1.72142	871.9
5.88469	2664	125151	5.99399	299.1	10704.2																			3.42141	402.7	32865.7										5.10912	313.7	10641.1	4.2921	777.3	101478				1.60741	868	287515	5.26412	316.9
			14.692	329.1	4266.4																			1.81501	379.7	60629.1										3.48539	214.7	9764.4	2.21688	719.6	170216				3.77697	259.1	12248.6	1.46865	1396.1
			13.5789	206.4	2050.4																			3.45465	304.7	14510.6													3.30876	332.2	14602.6				1.45428	502.6	103651	10.7495	540.7
			7.44271	150	1830.9																			2.69989	251.9	15878.9													1.65916	206.4	19557.8				1.56787	207.9	18452.4	6.32873	1740.4
			5.40343	251.8	8674.8																			6.80653	270.9	7975.6													17.0885	328.1	3890.5				1.61109	793.3	175685	14.396	214.5
			6.79134	172.5	2988.9																			1.40231	630.2	211028													2.28818	1368.1	480281				1.54711	390.8	74248.6	2.37497	1007.7
			7.09091	210.6	4564.8																			8.39208	657.1	32383.4													6.34718	213.9	5066.9				4.35336	304.3	15347.9	2.46795	154
			9.05263	240.8	3048																			3.37301	549.8	57331.4													7.25804	1060.4	84661				4.30332	181.6	4492.5	2.39609	294
			13.3763	394.6	7987.4																																								1.44735	327.1	51006.6	2.95355	2206.3
			3.52643	166.8	5591.3																																								1.59453	372.8	62215.5	11.5954	151.9
			4.18673	170.4	5072.1																																								1.27074	268	42773.4	1.33938	339.8
			10.8034	150	996.3																																								1.44244	208	20007.3	1.21875	308.1
																																													1.2209	163.6	16115.5	1.91782	373.4
																																													1.06824	267.7	35940
																																													2.54738	481.2	70108.3
																																													3.29308	280.9	15067.9
																																													3.74564	150.2	3922.1
																																													1.65788	245.2	23684.9
																																													1.26307	437.4	114320
																																													1.31057	161.2	14695.9
																																													1.27267	192.3	21468.9
																																													1.27205	171.6	7549.7
																																													1.43001	326.9	53400.1
																																													2.02153	535.3	100658
																																													2.2792	499.6	79071
																																													1.26355	421.9	105517
																																													1.90068	782.7	194988
																																													1.40296	208.2	21135
																																													2.70963	349	31500.1
																																													2.43509	170.7	9000.8
																																													1.79823	304.8	38488.6
																																													1.22638	225.9	23365.5
																																													1.91608	379	53394.8
																																													2.99645	252.9	16137.8
																																													1.69093	757.2	178821
																																													1.97451	162.7	10329.6
																																													2.35674	335.6	34132.8
																																													1.82529	238.2	19463.1
																																													1.37812	171.3	15108.6
																																													1.67073	356.7	55864.5
																																													1.49322	396.3	59660.4
																																													2.59615	661.5	87335.7
																																													1.64945	150.1	9918.2
																																													4.86347	263.6	8642
																																													1.3835	409.1	90019.7
																																													1.28957	405.7	97399.8
																																													1.65795	342.2	47874.5
																																													2.99078	356.8	31364.7
																																													1.40819	375	64840.3
																																													1.93076	290	27817.3
																																													2.11601	235.3	18702.1
																																													2.39433	185.8	10863.2
																																													1.13502	269	46544.4
																																													1.36921	375.3	73866.1
																																													3.05861	167	6976.7
																																													1.26669	330.1	64360.6
																																													1.36292	274.9	41560.3
																																													1.41631	163.3	12215.7
																																													2.74108	391.7	39981.7
																																													3.03644	675	100234
																																													1.37821	263.1	37615.9
																																													1.42032	521.4	145014
																																													1.19007	280.5	47448.6
																																													1.42287	516.5	142074
																																													1.39765	665.7	187979
																																													2.01527	303.5	21668.6
																																													2.09146	381.9	32775
																																													1.52388	778.4	278914
																																													1.45847	865.6	392591
																																													2.82733	188.3	7911.2
																																													1.19611	467.2	132100
																																													1.98805	548.9	93140
																																													1.87635	191.2	14543.5
																																													1.68004	150.7	10167.9
																																													1.52495	223.1	18277.6
																																													3.62815	389.3	19405.3
																																													1.46029	296	36063.6
																																													1.49385	230.8	21852.7
[truncated: 28 more columns]

## Sheet: species_400 degrees
L:W ratio	Lenght	Area	L:W ratio	Lenght	Area	L:W ratio	Lenght	Area	L:W ratio	Lenght	Area	L:W ratio	Lenght	Area	L:W ratio	Lenght	Area	L:W ratio	Lenght	Area
Wood & twig from tree									Broadleaf (shrubs)						Moss and fern (whole plant)
Pinus sylvestris (t)	Pinus sylvestris (t)	Pinus sylvestris (t)	Oxycoccus palustre (t)	Oxycoccus palustre (t)	Oxycoccus palustre (t)	Ledum palustre (t)	Ledum palustre (t)	Ledum palustre (t)	Vaccinium myrthillus (L)	Vaccinium myrthillus (L)	Vaccinium myrthillus (L)	Oxycoccus palustre (L)	Oxycoccus palustre (L)	Oxycoccus palustre (L)	Equisetum	Equisetum	Equisetum	Polytrichum commune	Polytrichum commune	Polytrichum commune
1.13911	617.089	228375	3.25432	1524.65	129001	1.9448	1187.98	444048	1.44008	420.851	93989	1.16662	482.831	134390	7.1553	1238.55	135959	2.6741	198.145	7389.37
6.1094	167.243	3249.11	4.18818	326.674	15225.6	1.1341	690.265	298340	2.97521	551.774	74564	1.40584	215.463	25222.7	10.6599	795.841	42665.7	3.22513	644.214	93501.4
2.50774	190.474	10833	2.81538	191.721	9990.5	2.75381	1326.94	423480	1.53818	698.182	157903	5.43459	486.406	10192.9	2.69917	2404.8	1.54582e+06	3.0968	560.459	31454.1
2.25042	231.393	16386.2	7.28006	1314.52	97192.2	10.739	187.133	2402.66	4.20077	154.245	2894.24	1.46835	372.613	67625.5	4.24323	1207.48	248720	2.36001	357.496	40009.3
2.02032	287.506	15658.1	1.97146	1349.87	416983	4.32051	180.673	3146.59	1.50956	281.574	39103.7	1.23455	172.209	16812.1	4.79552	369.262	5475.65	6.90495	925.987	64003.1
4.00251	233.81	9059.93	5.85131	1268.93	202731	5.51392	649.282	56839.8	1.58593	272.575	34695.3	1.51787	171.015	13892.9	4.50268	414.705	27844.9	4.66978	498.961	39499.3
1.59958	181.777	9401.67	4.35573	952.708	153468	1.62899	217.625	21505.7	1.5009	381.943	62586.2	1.53398	214.158	21079.8	3.27477	459.833	48075.6	8.75937	833.325	50239
1.79665	290.414	36329.1	1.39045	1843.49	1.19793e+06	2.54484	1760.32	892844	1.87036	571.293	124298	1.5308	154.498	11417.9	3.8116	271.023	7754.76	4.5853	377.287	23071.1
7.32598	185.755	2676.05	2.89931	250.528	15849.9	3.95048	157.935	4056.14	1.23942	174.866	18080.4	2.09521	210.92	13952	5.0839	281.519	9731.57	3.66159	609.67	76146.5
2.67192	165.465	7239.53	4.23943	547.112	53569.6	7.75431	456.586	16586	1.72183	192.465	15811.8	1.47039	218.368	23084.2	9.89701	600.744	20145.3	2.04999	331.207	38985.4
2.50798	223.976	13549.8	1.29816	690.548	171411	1.78063	726.555	205081	2.44504	404.655	49577.9	2.04468	183.354	11345.6	7.28378	1181.23	124459	1.33608	567.062	164363
5.28342	187.705	4442.56	6.73917	767.311	60120.4	2.77515	198.349	8015.01	1.73744	253.873	27426.9	2.92783	222.297	12136.9	2.45147	172.623	5367.87	6.52178	237.84	5947.51
5.67893	169.325	3555.36	2.34642	727.372	118909	6.30543	156.785	2495.98	1.6917	223.063	13317.2	1.7433	316.388	37590.9	2.59637	190.306	8218.74	2.39038	561.939	99864.3
2.00546	156.993	9017.87	10.4353	1608.63	60673.8	3.91042	264.138	12936	1.62997	235.918	20721	1.54195	209.041	19472.3	6.25121	175.658	2941.55	9.86494	185.081	1855.89
2.46055	214.744	12916.3	1.71151	832.441	78751.6	3.24906	1172.41	216888	1.81711	432.934	75958.6	1.28111	229.448	31699.9	1.52265	213.81	8214.79	4.06768	807.882	93812.9
1.94322	166.991	8682.71	4.84829	790.29	95900.1	2.15362	276.752	21667.3	2.06113	191.391	13346.1	1.54335	213.444	20711.8	7.5135	249.789	6249.81	7.47194	489.488	17545.5
4.62076	253.729	7749.51	8.44731	1381.45	115528	2.49652	171.946	7401.2	1.78946	384.096	57224.9	1.53824	153.219	11157.7	2.39886	489.084	70770.8	6.10289	1331.39	206925
2.3356	193.015	7898.03	3.72598	2212.88	754197	4.11616	766.742	104659	2.31508	893.759	112945	2.1406	208.635	13267.2	5.92212	192.246	4568.74	6.39732	870.787	69735
2.52779	400.252	41737.7	2.52405	531.331	76186	2.67124	199.992	11233.9	3.47278	157.063	4184.94	1.48139	217.325	22687.3	12.1381	238.522	1794.11	5.33226	347.265	14714.3
4.19913	213.112	7171.18	5.0053	903.232	109629	1.4731	556.259	149685	1.74233	237.747	22701.7	2.10414	180.831	10698.9	3.95299	277.142	14318.7	3.68076	459.729	39628.2
4.80847	273.232	6081.57	3.9472	2603.49	1.16425e+06	3.0329	343.611	24334.2	2.61645	278.192	21530.6	2.70135	201.826	11152.4	3.48435	207.401	9038.9	7.74959	452.6	20096.7
4.23258	199.836	6834.71	4.40611	159.522	4192.83	1.66753	280.106	35374.9	1.84902	446.627	75974.3	1.78102	311.342	36317.3	5.28228	431.525	25384.4	6.40931	670.454	47461.8
3.05729	225.373	10238.9	4.74828	914.176	118302	4.00748	271.246	11799.1	1.67867	609.348	80570.7	1.53643	202.392	18495.8	2.3689	197.127	10638.5	2.58742	215.264	13457.8
3.25554	151.195	3998.3	1.3134	159.499	14663.1	1.7109	171.207	12445.7	2.0185	159.074	6722.99	1.28097	225.556	30656.3	7.80748	399.674	14665.7	3.10386	460.893	29201.3
3.17408	182.782	7076.55	4.2437	2475.6	995294	2.43767	168.463	8801	1.99775	152.795	7873.06	1.64494	438.84	83149.5	2.16791	481.646	45068.3	1.3329	507.396	143305
3.36515	162.048	4830.3				4.54278	343.438	17782.1	3.31205	513.694	56952.8	1.34928	448.357	93410.7	4.34801	162.304	4221.75	8.16785	222.638	2937.61
4.54599	156.208	2789.09				4.64722	598.386	52555	1.04554	364.639	95629.4	1.83097	161.685	8568.36	7.14456	501.047	26764.4	8.44867	194.796	2941.55
6.47587	320.39	10436.1				3.34632	912.781	178189	2.48189	223.543	12175	3.75235	393.858	23322.1	4.72128	152.412	2844.29	3.37213	561.347	54506.8
1.8591	182.557	12926.8				4.94784	192.687	5706.98	1.17569	223.043	32422.8	1.14118	229.202	30740.4	1.70019	221.695	21102.2	8.0759	260.751	2807.49
2.68352	691.88	119869				1.59639	581.57	91805.9	2.37751	487.321	72751.5	1.83097	192.828	13489.3	4.77063	559.547	49521.4	3.66872	167.976	5087.91
1.6372	287.837	38727.8				4.07833	191.05	6662.52	4.44849	432.435	27751.5	2.62705	167.704	5696.47	4.89125	600.552	52077.8	15.7968	410.652	6788.7
3.03254	307.206	22661				3.07023	284.241	14893.1	1.24606	153.911	14338.4	1.48502	499.687	113133	3.67804	254.575	9375.38	4.33951	1057.1	56224.7
2.93547	512.145	54966.8				1.66979	1606.62	1.16188e+06	1.91635	292.079	30066.1				4.29029	190.968	5362.62	2.9884	465.387	54765.7
1.96537	156.884	8093.87				4.27069	154.414	4020.65	1.721	209.389	17971.3				10.965	204.354	2619.53	7.50465	221.829	3937.84
2.51312	454.369	59366				8.22845	440.928	13679.9	1.68552	591.211	146526				9.36015	696.004	34176.2	2.53935	547.987	82999.6
3.36217	153.296	3735.43				5.36014	1567.99	335486	1.82947	402.962	61412.5				1.32933	175.716	17151.2	2.25839	440.82	61248.2
4.50125	429.985	28018.4				3.79373	1866.12	646264	2.17983	507.757	60367.5				1.90869	253.544	23069.8	2.65176	2893.9	1.37289e+06
1.1735	667.226	280173				2.37691	216.793	9165.08	2.44088	237.32	17443				10.3184	380.106	7051.58	13.5283	322.602	3983.85
4.57823	210.082	5950.14				6.77762	393.058	16392.8	1.24891	526.113	166106				1.29262	312.833	54455.5	2.2848	156.349	7603.61
6.77395	248.443	4819.78				3.63798	383.974	16600.5	1.7766	299.307	37291.2				13.7469	273.845	3837.95	1.72631	882.847	218207
1.5391	848.573	357044				3.93007	166.083	5172.03	1.40565	540.366	153893				6.34943	150.966	2747.03	5.22128	156.164	2543.3
1.34795	768.742	320641				3.49155	434.343	40432.5	1.60697	510.926	114565				1.9893	780.975	145511	7.89708	400.738	13954.6
4.22803	151.799	4192.83				2.92341	515.124	67495.4	1.47021	212.087	21446.5				1.89798	866.344	268937	1.3603	208.133	11513.9
2.07209	574.381	121168				1.63725	479.061	94254.6	3.65194	224.607	9619.85				2.51329	390.471	45925.3	3.66659	176.367	6295.82
1.0953	394.542	107275				2.61567	467.253	60999.8	1.86428	161.294	10235				6.43681	244.208	5264.04	6.14631	191.192	3772.23
2.04166	1444.87	767560				5.91637	319.716	10595.1	3.15474	234.452	13406.5				5.62906	865.337	86466.9	5.99687	1086.02	105120
1.62483	1201.55	664059				1.72878	523.037	99761.7	2.63077	307.127	24854.7				1.77106	168.613	11977.8	3.93199	469.426	32984
3.91992	188.017	6264.27				1.57251	263.772	33868.6	4.36194	191.356	5601.83				1.46128	547.722	92678.6	9.17615	285.352	6393.08
2.39463	2179.02	1197920				5.91282	327.443	12398.4	1.81631	1399.93	646503				4.60968	502.008	40360.3	4.35403	219.337	7052.89
3.47879	180.689	5211.46				2.97976	2033.39	465944	1.33627	237.858	26659.3				3.63884	175.33	5575.54	3.52962	247.254	9535.73
3.02201	172.893	6519.26				1.56948	262.349	33643.8	1.07907	511.651	174240				3.93128	566.575	54652.7	3.55593	1920.92	392841
1.717	179.556	12206.5				1.97854	305.126	31232	3.31419	665.773	88024.5				3.73063	725.469	104825	2.46381	1536.65	376846
3.69435	279.306	14308.2				1.81154	261.286	28207.6	1.33047	282.224	45257.6				1.90797	902.243	290229	5.00888	208.349	5994.83
1.28263	507.64	71780.2				3.44501	454.782	40477.2	1.67377	560.488	121459				3.6579	210.337	8860.15	8.57562	154.366	1382.71
1.45976	512.333	124807				1.91942	492.145	33616.2	1.53027	362.176	66069.3				3.2291	1391.22	403152	2.61033	276.083	21501.7
5.78264	502.609	30501.2				3.0916	192.124	4924.93	3.05203	619.65	68864.9				2.22682	814.292	140228	1.91318	171.916	9165.08
2.21385	272.63	19820.6				1.95345	249.347	22039.3	1.66936	241.677	20032.3				5.30829	984.958	133282	7.08962	453.485	21280.9
2.91704	530.749	62859.6				5.6352	477.971	28182.7	1.69288	990.829	379479				2.83213	206.483	11053.8	2.11841	205.43	13883.7
2.78049	252.168	10507				1.64107	291.594	27675.3	1.90651	709.455	199267				4.86726	491.195	36289.7	3.97327	462.643	39006.5
4.52702	880.215	39789.8				3.63292	210.63	8749.74	1.29466	193.83	17607.3				3.63065	862.225	81317.2	5.32336	775.405	76263.5
2.34186	573.544	106815				1.42697	283.216	42781.3	1.58357	310.994	46370.9				6.9239	525.495	27839.6	5.61673	689.295	60919.6
2.12684	879.55	273907				8.94718	2141.77	328070	1.79515	181.788	12692.8				4.12846	1313.16	145694	3.16054	157.776	5788.47
2.31047	151.121	7193.53				6.38823	591.246	38684.4	1.84475	266.11	29430				2.26569	236.153	17065.7	1.33947	425.061	90151.1
2.03754	606.554	132161				10.7678	287.464	4814.53	1.63548	255.367	27863.3				2.51251	819.921	105615	6.36974	286.364	7221.13
2.26891	233.753	16497.9				2.69564	965.709	252824	2.03375	224.873	18543.1				11.9361	794.488	35669.3	2.96623	187.148	8607.79
1.55371	336.96	56048.5				1.43408	659.008	203143	2.13912	368.165	39657.1				3.87585	723.454	100452	5.52654	605.1	35171.1
4.63298	206.769	5617.6				7.60283	375.336	13461.7	1.70752	175.318	12194.7				2.06456	173.097	10128.5	2.68888	466.941	59748.5
4.93287	526.048	40117.1				2.11671	316.357	32470.1	1.99674	253.29	24699.6				3.54001	469.688	46278.9	1.81273	407.479	65714.4
5.60468	208.435	5308.73				6.49153	793.717	43943.2	2.71722	367.729	34489				12.2488	256.996	3697.31	2.55524	174	5708.29
1.08751	165.798	18815.2				2.94133	276.483	14689.4	1.67864	237.248	21487.3				2.72986	423.201	50169.4	2.64769	851.063	115374
2.32986	292.518	18181.6				4.89737	2166.72	702852	2.49211	265.964	20956.3				8.71133	732.129	35522.1	4.54131	545.149	45357.5
1.7771	407.877	52386.7				2.80855	1093.44	167704	1.37891	316.919	54172.9				3.37745	327.957	21018	4.90192	2005.14	406995
3.68335	222.621	7745.56				4.25192	289.89	15039	1.72976	760.311	218324				6.11046	551.225	37238.6	1.93909	674.142	162938
8.60107	177.285	2306.71				1.50186	658.924	192698	1.44667	960.639	472838				5.57809	517.483	31668.4	9.37697	503.253	17872.8
1.35738	468.221	120341				5.08295	204.189	6027.69	2.57442	1096.06	269295				5.53536	666.202	22034	13.3571	454.145	9809.12
1.5333	315.569	49508.3				3.814	756.353	104049	1.85439	577.343	130804				3.11531	1039.61	200877	2.03134	197.857	14714.3
1.41249	156.323	12320.9				2.36082	291.237	26631.7	1.17763	534.766	173800				1.58203	222.624	23695.4	1.75161	1756.06	485289
1.51413	1165.24	635277				1.88243	1690.36	1.02607e+06	1.21364	253.201	37839.3				8.63423	1176.62	119121	2.71791	983.6	263713
4.60767	547.732	46936				1.46114	473.545	98823.3	1.63097	778.902	239198				3.2567	679.623	101955	6.73503	1787.87	249989
2.82553	265.641	18581.2				3.47649	245.691	11901.6	1.25925	496.17	136623				6.17608	491.19	28692.6	1.65343	270.055	33200.9
2.4001	193.344	10658.2				7.63588	1565.3	157898	1.33205	217.195	26878.8				10.9206	371.373	9494.99	2.50375	413.29	46465.5
1.23906	213.667	26934				2.70685	197.463	10275.7	1.43388	243.557	29042.2				4.61413	252.543	10237.6	3.40564	366.651	7586.52
4.43443	693.009	79324.7				2.32834	190.196	10675.3	1.68739	348.713	53304.1				10.3739	258.199	3159.74	2.91419	191.673	9611.96
1.36708	173.844	16821.3				6.91902	285.26	7689.05	1.69741	308.28	42794.5				2.89995	969.932	221291	3.00775	218.9	10650.3
2.31559	553.612	60442.5				2.2169	185.305	10796.2	1.57578	150.447	9421.38				1.15411	488.081	57159.2	6.43099	181.157	3471.24
1.47758	339.755	46494.4				3.8286	1810.51	505749	1.70759	423.524	64659				1.61161	376.94	59291.1	10.1897	169.268	1565.41
1.71922	366.791	42719.5				12.3805	502.64	10826.4	1.98909	389.465	57331.4				5.51936	181.431	2290.94	7.83847	383.236	12724.4
2.30917	183.23	9860.38				1.99239	243.635	19046.5	1.41543	414.517	85414.1				1.83223	375.064	15366.3	4.35758	210.51	6174.89
3.34028	155.22	5308.73				1.27562	1846.11	1.28332e+06	1.30526	261.768	37540.9				4.67136	690.914	74750.7	1.7566	3030.55	1.65418e+06
1.79177	389.885	51499.5				3.30053	157.217	5650.46	1.27914	280.958	40444.4				12.8949	297.867	4974.88	8.32619	167.261	2146.36
1.80824	913.619	337953				1.4655	167.357	14573.7	2.5959	799.139	116302				1.37115	570.681	140399	8.58912	221.624	3590.85
1.84005	159.431	9564.65				1.67587	156.816	4633.14	1.29475	536.495	156984				2.2459	880.369	62538.9	3.88905	981.373	162109
1.7282	198.926	16612.3				2.18187	928.088	222982	1.52123	308.27	47137.1				2.62222	299.783	21982.8	2.91414	566.405	75870.5
2.56026	164.883	7635.16				4.14042	217.682	7373.6	1.38628	207.696	22979.1				2.84823	1503.79	587722	10.0436	213.166	2986.24
2.76955	251.939	15813.1				2.04675	469.338	62332.5	1.63724	536.709	109581				11.4796	201.355	2560.39	7.73857	1451.19	80791.5
1.64742	1113.65	504936				1.78934	267.788	30958.6	1.68546	352.6	55129.8				3.9046	182.79	5490.11	4.95438	802.14	37982.6
7.15817	555.228	25594.7				2.25009	197.159	12690.2	1.69759	167.913	10330.9				2.94188	335.927	21157.4	2.75412	510.623	51753.2
1.6907	714.906	207634				10.0977	454.696	10818.6	1.56959	422.709	69620.7				2.73978	485.187	17931.9	2.72123	1452.23	517186
2.26731	1553.02	784874				2.5568	300.482	15537.1	1.41018	360.728	57893.9				2.49514	1715.59	700243	10.9832	992.078	54037.6
4.74774	175.961	4336.1				2.27047	352.629	32788.2	1.59212	785.475	245123				7.26744	211.829	3086.13	4.24503	224.806	7671.96
1.51449	155.541	9890.61				1.94974	792.096	176409	1.43734	162.286	11014.4				4.63833	988.926	60546.3	1.15408	303.096	59260.9
3.89536	208.759	7236.9				2.37221	447.697	47735.2	1.66542	169.72	6878.08				18.2735	724.367	19465.8	4.592	404.902	23916.2
3.59962	462.125	42546.1				2.45441	302.16	11529.6	1.18875	178.584	20714.4				4.16634	1312.81	134197	2.81127	186.879	6829.45
6.61855	268.954	6891.22				1.9348	274.116	30068.8	1.75472	330.991	25323.9				11.385	199.028	1194.76	2.31073	446.588	65577.7
7.08906	169.36	2311.97				5.6709	1740.5	281080	4.84007	447.386	16901.4				2.43086	357.814	35374.9	5.2143	159.423	3301.69
3.20648	589.595	79987.1				3.31446	2952.31	1.05233e+06	1.32384	278.246	41711.4				1.97691	185.691	12824.3	1.63846	384.823	64008.3
1.92411	384.015	49552.9				1.70982	307.656	37351.7	5.93142	580.368	36092.5				2.25702	308.961	32078.4	2.80096	409.657	41273.7
2.46719	630.43	98013.6				1.72537	400.999	55630.6	3.83615	229.381	9462.13				9.72419	499.383	18022.6	2.9126	1018.75	154290
1.93006	385.158	58489.3				3.4522	424.514	37147.9	9.02551	163.894	1685.02				2.75456	182.359	8644.59	2.49479	241.263	16055
5.47041	293.665	3514.62				4.96417	1150.63	179353	3.1209	403.4	32316.3				3.00222	3000.81	1.01529e+06	7.57754	395.306	12819
1.62629	391.917	65489.6				1.84343	630.365	157462	2.71003	760.147	111065				3.78513	374.689	24255.3	1.61259	245.794	23163.1
1.78844	743.367	234362				1.66918	1121.23	548602	2.20054	200.703	12699.4				4.53496	203.748	5961.97	2.2839	186.853	11254.9
1.24749	269.644	36022.8				6.92592	1525.45	241046	14.6858	284.95	2714.17				3.25594	358.863	28558.6	2.66988	2658.85	1.535e+06
2.07247	1977.06	1302957				2.26598	365.103	43839.4	2.46616	159.95	7678.53				7.06619	568.837	33902.8	8.37444	303.275	8117.53
5.10475	247.236	7585.21				5.15019	472.83	29959.7	1.16328	243.521	38902.6				3.71001	460.401	41158.1	3.04898	810.123	130816
2.79939	184.916	7841.51				19.2073	1717.15	66935.4	1.6084	314.821	46286.7				3.95862	226.609	7921.69	1.56249	435.698	91357.7
2.29097	375.281	37514.7				2.91193	161.766	6665.15	2.9653	1091.43	156595				2.79398	628.874	96511.3	3.78873	1169.64	236317
2.49501	213.853	14182				1.8191	239.202	22902.8	1.94598	199.019	12080.3				2.2536	389.498	47557.7	3.39639	150.525	5010.37
4.01502	360.472	24014.8				2.24788	550.552	93116.3	1.7386	286.733	36248.9				6.23865	811.026	74123.7	4.83753	339.236	17470.6
2.56732	187.062	6617.84				1.43693	260.499	34164.3	1.13038	190.776	23085.5				1.90258	210.997	16441.4	1.31824	437.918	30682.6
1.49608	181.484	15966.9				3.35987	161.166	5678.06	1.19182	627.722	195291				3.29663	430.663	41294.8	2.64686	438.741	34315.5
1.82051	177.095	12302.5				3.02107	1022.15	241698	3.15817	537.025	37845.9				10.763	729.968	28998.9	2.13313	2688.41	1.07052e+06
2.4629	1518.47	641052				1.91947	614.782	127940	1.83888	391.782	54693.4				3.00254	838.567	176604	5.70232	287.421	10961.8
2.28787	209.878	14057.2				2.34236	673.583	138989	2.03754	524.93	85723				3.36961	307.337	20078.3	5.07123	392.736	19937.6
1.69896	871.876	329081				4.80026	1272.17	243312	2.10095	947.965	256530				7.33812	386.833	15111.3	5.13974	308.127	10819.9
2.21666	1034.2	245680				2.79359	761.906	145983	1.43163	194.795	15376.8				2.32868	223.262	15443.8	5.38479	308.366	13378.9
1.15917	218.195	27200.8				1.69888	449.722	87009.8	1.99738	164.751	8845.69				3.19825	489.43	55466.3	4.53934	197.095	6249.81
5.72592	259.385	7545.78				5.02412	1019	149815	1.61685	156.874	10543.8				6.18245	197.477	3464.67	2.60673	1119.75	337696
5.83956	1619.45	237343				4.18953	280.945	4291.41	1.27702	302.962	54552.8				5.80098	394.354	14118.9	10.6364	249.234	2352.72
5.86522	245.831	7027.92				12.201	222.075	2903.44	1.70393	494.215	78675.4				7.8713	216.281	2185.79	12.661	318.218	5286.38
1.75902	303.277	33751.6				10.4666	181.967	2033.33	7.65396	206.015	3816.92				10.4869	240.054	3024.36	4.05896	196.998	7030.55
2.63844	354.282	18489.2				9.51491	287.278	5320.56	1.36067	240.073	32064				2.47393	603.452	69444.6	9.27678	312.043	6717.73
3.13647	417.535	24251.4				8.97434	934.246	72359.8	1.57359	182.507	16395.4				1.83504	189.761	12238.1	2.24306	924.753	284065
1.46558	371.011	55463.6				4.60458	215.174	5572.91	2.28454	1039.86	306859				2.91634	224.93	5800.3	8.02386	171.267	2620.85
1.97347	383.478	46633.7				8.8777	865.24	62688.7	1.83374	711.39	170559				2.07688	300.01	32982.7	2.49991	364.63	39566.4
1.80427	341.943	35685.1				8.70771	381.647	3975.96	2.05688	1008.7	222408				6.41216	504.913	27420.3	4.41526	432.748	25217.4
2.18974	300.694	10562.3				5.27917	235.845	7401.2	2.94705	933.868	198375				2.11483	1921.26	288883	2.22598	587.515	94424.1
1.6588	349.904	49159.9				4.18055	150.826	2912.64	1.61924	240.316	25506.6				2.73498	476.224	58187	3.35397	486.319	30523.5
1.31881	204.516	18735				3.55973	206.894	7820.48	1.53292	261.874	28350.9				2.2307	228.819	11173.4	3.24934	850.156	170594
2.4421	260.412	11582.2				8.49607	541.397	24632.5	1.38451	560.884	157297				3.71375	182.523	5676.75	9.72524	856.003	51289.2
2.33644	282.911	24746.9				3.03615	256.193	15554.2	1.2995	573.438	163003				3.98985	813.36	117314	3.2774	406.766	38616.1
1.70653	345.521	46165.8				2.9108	327.444	25864.1	1.14234	191.174	21484.6				4.10232	519.681	49056.1	3.06993	183.87	7594.41
1.68965	287.379	36166.1				5.61547	152.45	2913.95	1.42613	287.752	42669.6				8.77969	274.306	6450.91	1.69693	376.014	51857
1.73291	260.969	30263.3				4.76553	183.903	4343.98	1.82947	313.387	38455.7				2.13356	206.216	13883.7	3.58336	419.739	24231.7
1.95545	275.822	27676.6				4.40206	177.677	5119.46	1.69874	462.119	88880.1				2.42354	246.615	16023.4	2.62344	505.275	60119.1
2.63794	462.528	44078.6				2.84064	2259.7	1.27978e+06	1.08836	188.414	25041.3				2.05753	271.826	26679	6.89144	1339.37	168507
2.1523	280.147	24098.9				6.42481	2623.33	762564	2.33387	816.088	184377				3.37409	1093.27	240753
1.66701	524.58	114731				1.45624	426.753	92580	1.90276	186.05	12808.5				3.20071	688.854	107472
7.19303	242.766	5106.31				4.92113	812.587	99911.6	1.63855	211.724	19381.7				6.02482	955.339	30227.8
1.93645	617.411	145030				3.57909	1194.14	289546	1.27295	270.457	34928				2.51475	401.189	34708.5
1.98982	186.011	12901.8				6.24405	523.674	31757.7	1.39114	1355.28	630407				2.93045	1009.94	254093
						6.06613	2484.6	457100	2.51358	510.609	75100.3				8.88397	241.956	4329.52
									1.30542	167.482	16235.1
									1.88437	239.759	23427.3
									1.69438	391.686	61787.1
									1.53141	316.822	49149.4
									1.72554	561.746	105891
